# Supplementary material
Source: publisher figshare collection journal article supplement (https://acs.figshare.com/ndownloader/files/3940291)

# Anionic Phospho-Fries Rearrangement at Ferrocene: One-Pot Approach to *P,O*-substituted Ferrocenes

Marcus Korb, Dieter Schaarschmidt and Heinrich Lang\*

Technische Universität Chemnitz, Fakultät für Naturwissenschaften, Institut für Chemie, Anorganische Chemie,  
Straße der Nationen 62, 09107 Chemnitz, Germany

E-mail: heinrich.lang@chemie.tu-chemnitz.de

## Supporting Information

### Inhalt

|                                                                           |   |
|---------------------------------------------------------------------------|---|
| Crystal structures of <b>10</b> and <b>18</b> .....                       | 2 |
| General Information .....                                                 | 2 |
| Instruments .....                                                         | 3 |
| Reagents .....                                                            | 3 |
| Optimization of the Stelzer coupling of ferrocenylphosphine .....         | 4 |
| Experimental procedures .....                                             | 4 |
| General Procedure for Suzuki-Miyaura cross-coupling reactions .....       | 4 |
| 2-Methyl-1-(2'-methylphenyl)naphthalene ( <b>25a</b> ) .....              | 5 |
| 2-Methyl-1-(2-methoxyphenyl)naphthalene ( <b>25b</b> ) .....              | 5 |
| 2-Methyl-1-(2-fluorophenyl)naphthalene ( <b>25c</b> ) .....               | 5 |
| 2-Methoxy-1-(2-fluorophenyl)naphthalene ( <b>25d</b> ) .....              | 6 |
| 2-Methoxy-1-(2-methylphenyl)naphthalene ( <b>25e</b> ) .....              | 6 |
| 2-Methoxy-1-(2-methoxyphenyl)naphthalene ( <b>25f</b> ) .....             | 7 |
| 2-Methoxy-1-(2-phenylphenyl)naphthalene ( <b>25g</b> ) .....              | 7 |
| 9-(2-Methoxy-1-naphthyl)phenanthrene ( <b>25h</b> ) .....                 | 7 |
| <sup>1</sup> H and <sup>13</sup> C NMR spectra of the new compounds ..... | 9 |

## Crystal structures of **10** and **18**

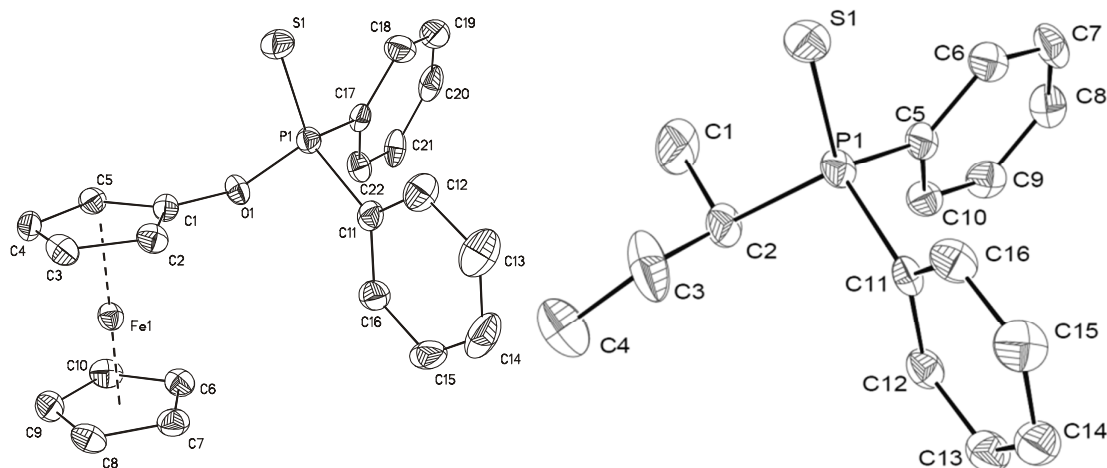

**Figure S11.** ORTEP diagram (50 % probability level) of the molecular structure of **10** (left) and **18** (right) with the atom-numbering scheme. All hydrogen atoms have been omitted for clarity. Selected bond distances (Å), angles (°) for **10**: C1–O1 1.394(4), C11–P1 1.806(3), C17–P1 1.805(3), O1–P1 1.616(2), P1–S1 1.9249(12), D1–Fe1 1.6453(5), D2–Fe1 1.6504(5); C1–O1–P1 121.30(19), O1–P1–S1 116.33(9), C17–P1–S1 115.05(12), C11–P1–C17 107.09(15), C11–P1–O1 105.46(15), O1–P1–C17 98.41(14), C11–P1–S1 113.04(12), D1–Fe1–D2 178.40(4) (D1 denotes the centroid of C<sub>5</sub>H<sub>4</sub>; D2 denotes the centroid of C<sub>5</sub>H<sub>5</sub>). Selected bond distances (Å), angles (°) for **18**: C2–P1 1.828(4), C5–P1 1.814(4), C11–P1 1.827(3), P1–S1 1.9632(13), C5–P1–C11 103.25(15), C5–P1–C2 107.56(18), C11–P1–C2 106.48(17), C5–P1–S1 112.36(13), C11–P1–S1 113.68(13), C2–P1–S1 112.84(13).

The thiophosphinate **10** and phosphine sulfide **18** crystallize in the monoclinic space group  $P2_1/c$  (**10**) and the triclinic space group  $P\bar{1}$  (**18**) with two independent molecules in the asymmetric unit. In case of phosphine sulfide **10** the asymmetric unit contains both enantiomers with respect to the chiral carbon atom C2. The P–C<sub>Ph</sub> distances are equal for both molecules, whereas the P–S distance increases from 1.9249(12) (**10**) to 1.9632(13) Å (**18**) through the exchange of the ferrocenolato moiety by a <sup>s</sup>butyl group. The angle between the two phenyl rings is reduced from 107.09(15) ° (**10**) to 103.25(15) ° (**18**), due to the presence of a sterically more demanding secondary carbon in comparison to an oxygen atom. Thus, both phosphorous atoms possess a distorted tetrahedral geometry.

## General Information.

All reactions were carried out under an argon or nitrogen atmosphere using standard Schlenk techniques. Reaction vessels were heated at reduced pressure with a heat gun and flushed with argon. This procedure was repeated three times. If necessary, solvents were deoxygenated by standard procedures.

For column chromatography either silica with a particle size of 40–60  $\mu\text{m}$  (230–400 mesh (ASTM), Fa. Macherey-Nagel) or alumina with a particle size of 90  $\mu\text{m}$  (Standard, Fa. Macherey-Nagel) was used.

## Instruments

FT IR spectra were recorded with a Nicolet IR 200 spectrometer (Fa. Thermo) between NaCl crystals or as KBr pellets.

NMR spectra were recorded with a Bruker Avance III 500 spectrometer (500.3 MHz for  $^1\text{H}$ , 125.7 MHz for  $^{13}\text{C}\{^1\text{H}\}$ , and 202.5 MHz for  $^{31}\text{P}\{^1\text{H}\}$  spectra). Chemical shifts are reported in  $\delta$  (ppm) downfield from tetramethylsilane with the solvent as reference signal ( $^1\text{H}$  NMR,  $\text{CHCl}_3$   $\delta$  7.26,  $\text{C}_6\text{HD}_5$   $\delta$  7.16;  $^{13}\text{C}\{^1\text{H}\}$  NMR,  $\text{CDCl}_3$   $\delta$  77.00,  $\text{C}_6\text{D}_6$   $\delta$  128.06;  $^{31}\text{P}\{^1\text{H}\}$  NMR, standard external relative to 85%  $\text{H}_3\text{PO}_4$   $\delta$  0.0,  $\text{P}(\text{OMe})_3$   $\delta$  139.0). The melting points were determined using a Gallenkamp MFB 595 010 M melting point apparatus. Elemental analyses were measured with a Thermo FlashAE 1112 instrument. High-resolution mass spectra were recorded with a Bruker Daltonik micrOTOF-QII spectrometer.

## Single-Crystal X-ray Diffraction Analysis.

Suitable single crystals of **1**, **10**, and **18** for X-ray diffraction analysis were obtained by recrystallization from n-hexane at ambient temperature. Data were collected with an Oxford Gemini S diffractometer at 100 K with graphite-monochromated Mo  $K_\alpha$  radiation ( $\lambda = 0.71073 \text{ \AA}$ ). The structures were solved by direct methods and refined by fullmatrix least-squares procedures on  $F^2$ .<sup>1</sup> All non-hydrogen atoms were refined anisotropically and a riding model was employed in the treatment of the hydrogen atom positions.

The HPLC measurements were performed with a Knauer system consisting of a WellChrom Mini-Star K-500 pump and a WellChrom K-2000 UV detector operating at 245 nm equipped with a Chiralcel OD-H column (4.6 x 250 mm) using 9/1 (v/v) hexane/isopropanol mixture (0.5 mL/min) as the solvent. Retention times are reported in  $t$  (minutes).

## Reagents

Tetrahydrofuran was purified by distillation from sodium/ benzophenone ketyl; dichloromethane was purified by distillation from calcium hydride.

All starting materials were obtained from commercial suppliers and used without further purification. Acetocyferrocene,<sup>2</sup> ferrocenol<sup>3</sup>, 1,1-bis(acetoxy)ferrocene,<sup>2</sup> 1,1'-ferrocenediol<sup>2</sup> and ferrocenylphosphine (**26**)<sup>4</sup> were prepared according to published procedures. The spectroscopic data of synthesized ferrocenyldiphenylphosphane (**27**) are in agreement with literature.<sup>5</sup>

## Optimization of the Stelzer coupling of ferrocenylphosphine

The Palladium-catalyzed Stelzer *P,C*-bond formation between ferrocenylphosphine (**26**) and arylhalides has not been described so far in the literature. The phosphine is accessible in a multi gram scale, thus, we investigated **26** instead of **12** in a test reaction to explore the reaction conditions. The results for the formation of **27** are summarized in Table **SI1**. The best results were reached using two equivalents  $K_3PO_4$  with toluene as the solvent (Table **SI1**, entry 4). The usage of other bases decreases the yield dramatically. With an increase of base also a significant amount of the corresponding phosphanoxide can be detected (up to 50 %, Table **SI1**, entry 2). Nevertheless, it is known that phosphaneoxides can be converted to the corresponding phosphane.<sup>6</sup>

**Table SI1.** Stelzer-coupling of ferrocenylphosphine

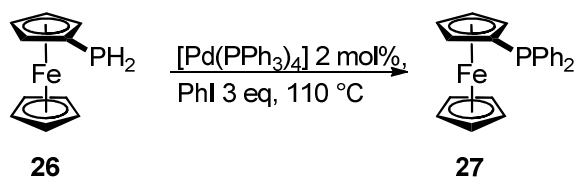

| Entry | Base (equiv)  | solvent     | Yield <sup>[a]</sup> |
|-------|---------------|-------------|----------------------|
| 1     | $NEt_3$ (4)   | toluene     | 0 %                  |
| 2     | $K_3PO_4$ (4) | toluene     | 68 % <sup>[b]</sup>  |
| 3     | $CsF$ (4)     | toluene     | 26 %                 |
| 4     | $K_3PO_4$ (2) | toluene     | 72 %                 |
| 5     | $K_3PO_4$ (4) | 1,4-dioxane | 65 %                 |
| 6     | $K_3PO_4$ (2) | 1,4-dioxane | 48 %                 |

[a] isolated Yiel. Spectroscopic date are in agreement with literature.<sup>5</sup> [b] 50 % of corresponding phosphanoxide were formed.

## Experimental procedures

### General Procedure for Suzuki-Miyaura cross-coupling reactions

A glass vessel (3 mL size) was charged with  $[Pd_2(dba)_3]$ , 0.25 mol%, **1**  $[Pd/P = 1:2 (n/n)]$ , boronic acid (1.5 mmol), powdered  $K_3PO_4 \times H_2O$  (690 mg, 3.0 mmol), the appropriate aryl halide (1.0 mmol) and dry toluene (3 mL). The vessel was purged with argon and closed. The reaction mixture was heated at  $70\text{ }^\circ\text{C}$ , except otherwise noted, with vigorous stirring for 24 h. After cooling to room temperature, the reaction mixture was diluted with water (25 mL) and extracted with diethyl ether (3 x 25 mL). The

combined organic extracts were filtered through alumina and concentrated under reduced pressure. The obtained crude material was purified by flash chromatography on silica (hexane/diethyl ether mixtures).

### 2-Methyl-1-(2'-methylphenyl)naphthalene (25a)

The title compound was obtained as a colourless liquid from 2-methyl-1-bromnaphthalene (220 mg) and *o*-tolylboronic acid (205 mg) by using the general procedure for Suzuki-Miyaura cross-coupling reactions and purified using hexane. The analytical data are in agreement with literature.<sup>7</sup> Yield: 230 mg (99 % based on the aryl halide). <sup>1</sup>H NMR (CDCl<sub>3</sub>,  $\delta$ ): 1.94 (s, 3H, CH<sub>3</sub>), 2.18 (s, 3H, CH<sub>3</sub>), 7.14 (d,  $J_{\text{H,H}}$  = 7.1 Hz, 1H), 7.26 (d,  $J_{\text{H,H}}$  = 8.4 Hz, 1H), 7.31–7.34 (m, 2H), 7.35–7.39 (m, 2 H), 7.41 (ddd,  $J_{\text{H,H}}$  = 8.1 Hz,  $J_{\text{H,H}}$  = 6.8 Hz,  $J_{\text{H,H}}$  = 1.3 Hz, 1H), 7.44 (d,  $J_{\text{H,H}}$  = 8.4 Hz, 1H), 7.80 (d,  $J_{\text{H,H}}$  = 8.4 Hz, 1H), 7.85 (d,  $J_{\text{H,H}}$  = 8.6 Hz, 1H). <sup>13</sup>C{<sup>1</sup>H} NMR (CDCl<sub>3</sub>,  $\delta$ ): 19.5, 20.3, 124.7, 125.87, 125.7, 125.9, 127.1, 127.4, 127.8, 128.6, 129.97, 130.04, 132.0, 132.6, 133.1, 136.8, 137.5, 139.2.

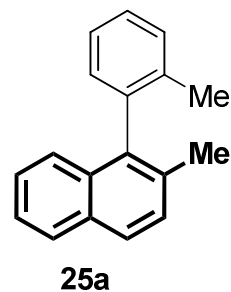

### 2-Methyl-1-(2-methoxyphenyl)naphthalene (25b)

The title compound was obtained as colourless liquid from 2-methyl-1-bromnaphthalene (220 mg) and 2-methoxyphenylboronic acid (230 mg) by using the general procedure for Suzuki-Miyaura cross-coupling reactions and purified using a 98/2 (v/v) hexane/diethyl ether mixture. The analytical data are in agreement with literature.<sup>8</sup> Yield: 247 mg (99 % based on the aryl halide). <sup>1</sup>H NMR (CDCl<sub>3</sub>,  $\delta$ ): 2.22 (s, 3H, CH<sub>3</sub>), 3.68 (s, 3H, OCH<sub>3</sub>), 7.06–7.11 (m, 2H), 7.14 (dd,  $J_{\text{H,H}}$  = 7.4 Hz,  $J_{\text{H,H}}$  = 1.8 Hz, 1H), 7.29–7.32 (m, 1H), 7.35–7.40 (m, 2H), 7.42–7.45 (m, 2H), 7.78 (d,  $J_{\text{H,H}}$  = 8.4 Hz, 1H), 7.83 (d,  $J_{\text{H,H}}$  = 8.1 Hz, 1H). <sup>13</sup>C{<sup>1</sup>H} NMR (CDCl<sub>3</sub>,  $\delta$ ): 20.5 (CH<sub>3</sub>), 55.6 (OCH<sub>3</sub>), 111.2, 120.7, 124.6, 125.6, 125.9, 127.2, 127.8, 128.3, 128.5, 128.8, 131.8, 132.0, 132.9, 133.9, 134.6, 157.4.

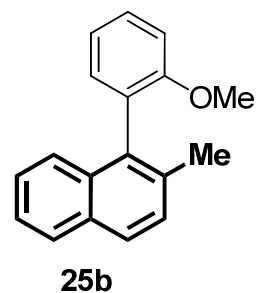

### 2-Methyl-1-(2-fluorophenyl)naphthalene (25c)

The title compound was obtained as a colourless oil from 2-methyl-1-bromnaphthalene (220 mg), 2-fluorophenylboronic acid (335 mg) and K<sub>3</sub>PO<sub>4</sub> x 3H<sub>2</sub>O (800 mg, 3.0 mmol) by using the general procedure for Suzuki-Miyaura cross-coupling reactions and purified using a 99/1 (v/v) hexane/diethyl ether mixture. The analytical data are in agreement with literature. Yield: 215 mg (91 % based on the

aryl halide).  $^1\text{H}$  NMR ( $\text{CDCl}_3$ ,  $\delta$ ): 2.27 (s, 3H,  $\text{CH}_3$ ), 7.21–7.30 (m, 3H), 7.34–7.47 (m, 5H), 7.82 (d,  $J_{\text{H,H}} = 8.5$  Hz, 1H), 7.85 (d,  $J_{\text{H,H}} = 8.1$  Hz, 1H).  $^{13}\text{C}\{^1\text{H}\}$  NMR ( $\text{CDCl}_3$ ,  $\delta$ ): 20.5 (s,  $\text{CH}_3$ ), 115.8 (d,  $J_{\text{C,F}} = 22.3$  Hz), 124.1 (d,  $J_{\text{C,F}} = 3.6$  Hz), 124.9, 125.5, 126.1, 126.8 (d,  $^2J_{\text{C,F}} = 17.7$  Hz, C<sup>*i*</sup>-Ph), 127.90, 127.96, 128.5, 129.4 (d,  $J_{\text{C,F}} = 7.9$  Hz), 131.6, 132.0, 132.4 (d,  $J_{\text{C,F}} = 3.8$  Hz), 132.7, 134.3, 160.2 (d,  $^1J_{\text{C,F}} = 245.4$  Hz, C–F). HRMS (ESI-TOF,  $m/z$ ): calcd for  $\text{C}_{17}\text{H}_{13}\text{F}+\text{H}$  237.1074, found 237.1065  $[\text{M}+\text{H}]^+$ .

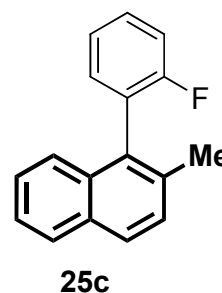

### 2-Methoxy-1-(2-fluorophenyl)naphthalene (25d)

The title compound was obtained as a white solid from 2-methoxy-1-bromnaphthalene (235 mg), 2-fluorophenylboronic acid (210 mg) and  $\text{K}_3\text{PO}_4 \times 3\text{H}_2\text{O}$  (800 mg, 3.0 mmol) by using the general procedure for Suzuki-Miyaura cross-coupling reactions and purified using a 94/6 (v/v) hexane/diethyl ether mixture. The analytical data are in agreement with literature.<sup>9</sup> Yield: 235 mg (93 % based on the aryl halide).  $^1\text{H}$  NMR ( $\text{CDCl}_3$ ,  $\delta$ ): 3.88 (s, 3H,  $\text{OCH}_3$ ), 7.22 (ddd,  $J_{\text{H,H}} = 9.3\text{Hz}$ ,  $J_{\text{H,H}} = 8.3$  Hz,  $J_{\text{H,H}} = 1.0$  Hz, 1H), 7.28 (dd,  $J_{\text{H,H}} = 7.4$  Hz,  $J_{\text{H,H}} = 1.2$  Hz, 1H), 7.32–7.40 (m, 4H), 7.42–7.45 (m, 2H), 7.82–7.85 (m, 1H), 7.93 (d,  $J_{\text{H,H}} = 9.0$  Hz, 1H).  $^{13}\text{C}\{^1\text{H}\}$  NMR ( $\text{CDCl}_3$ ,  $\delta$ ): 56.8 ( $\text{OCH}_3$ ), 113.6, 115.7 (d,  $J_{\text{C,F}} = 22.5$  Hz), 118.8, 123.6, 123.8 (d,  $^2J_{\text{C,F}} = 17.3$  Hz), 123.8 (d,  $J_{\text{C,F}} = 3.6$  Hz), 124.7, 126.6, 128.0, 129.0, 129.3 (d,  $J_{\text{C,F}} = 8.0$  Hz), 129.9, 133.1 (d,  $J_{\text{C,F}} = 3.7$  Hz), 133.4, 154.4, 160.6 (d,  $^1J_{\text{C,F}} = 246.3$  Hz, C–F). HRMS (ESI-TOF,  $m/z$ ): calcd. for  $\text{C}_{17}\text{H}_{13}\text{FO}+\text{H}$  253.1023, found 253.1036  $[\text{M}+\text{H}]^+$ .

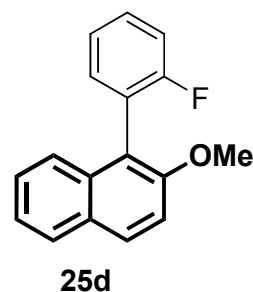

### 2-Methoxy-1-(2-methylphenyl)naphthalene (25e)

The title compound was obtained as a white solid from 2-methoxy-1-bromnaphthalene (235 mg) and *o*-tolylboronic acid (205 mg) by using the general procedure for Suzuki-Miyaura cross-coupling reactions and purified using a 98/2 (v/v) hexane/diethyl ether mixture. The analytical data are in agreement with literature.<sup>10</sup> Yield 160 mg (64 % based on the aryl halide)  $^1\text{H}$  NMR ( $\text{CDCl}_3$ ,  $\delta$ ): 2.02 ( $\text{CH}_3$ ), 3.85 ( $\text{OCH}_3$ ), 7.21 (d,  $J_{\text{H,H}} = 7.0$  Hz, 1H), 7.28–7.40 (m, 7H), 7.85 (dd,  $J_{\text{H,H}} = 6.8$  Hz,  $J_{\text{H,H}} = 2.5$ , 1H), 7.91 (d,  $J_{\text{H,H}} = 9.0$  Hz, 1H).  $^{13}\text{C}\{^1\text{H}\}$  NMR ( $\text{CDCl}_3$ ,  $\delta$ ): 19.7 ( $\text{CH}_3$ ), 56.6 ( $\text{OCH}_3$ ), 113.6, 123.5, 124.5, 125.0, 125.6, 126.3, 127.5, 127.8, 128.97, 129.0, 129.8, 130.8, 133.5, 136.1, 137.6, 153.7.

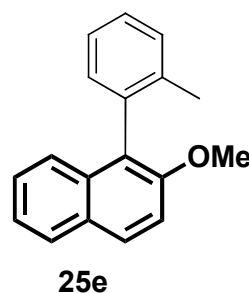

### 2-Methoxy-1-(2-methoxyphenyl)naphthalene (25f)

The title compound was obtained as a white solid from 2-methoxy-1-bromnaphthalene (235 mg) and 2-methoxyphenylboronic acid (230 mg) by using the general procedure for Suzuki-Miyaura cross-coupling reactions and purified using a 9/1 (v/v) hexane/diethyl ether mixture. The analytical data are in agreement with literature.<sup>10</sup> Yield: 243 mg (92 % based on the aryl halide). <sup>1</sup>H NMR (CDCl<sub>3</sub>,  $\delta$ ): 3.69 (s, 3H, OCH<sub>3</sub>), 3.84 (s, 3H, OCH<sub>3</sub>), 7.05–7.11 (m, 2H), 7.22 (dd,  $J_{\text{H,H}} = 7.4$  Hz,  $J_{\text{H,H}} = 1.8$ , 1H), 7.29–7.33 (m, 2H), 7.35–7.39 (m, 2H), 7.42 (ddd,  $J_{\text{H,H}} = 8.3$  Hz,  $J_{\text{H,H}} = 7.5$  Hz,  $J_{\text{H,H}} = 1.8$  Hz, 1H), 7.80–7.83 (m, 1H), 7.88 (d,  $J_{\text{H,H}} = 9.0$  Hz, 1H). <sup>13</sup>C{<sup>1</sup>H} NMR (CDCl<sub>3</sub>,  $\delta$ ): 55.1 (OCH<sub>3</sub>), 57.0 (OCH<sub>3</sub>), 111.3, 114.2, 120.6, 122.1, 123.4, 125.3, 125.4, 126.1, 127.8, 128.8, 129.05, 129.08, 132.4, 133.7, 154.3, 157.8.

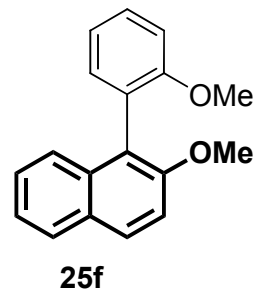

### 2-Methoxy-1-(2-phenylphenyl)naphthalene (25g)

The title compound was obtained as a white solid from 2-methoxy-1-bromnaphthalene (235 mg) and 2-phenylphenylboronic acid (290 mg) by using the general procedure for Suzuki-Miyaura cross-coupling reactions and purified using a 98/2 (v/v) hexane/diethyl ether mixture. The analytical data are in agreement with literature.<sup>9</sup> Yield: 305 mg (99 % based on the arylhalide). <sup>1</sup>H NMR (CDCl<sub>3</sub>,  $\delta$ ): 3.52 (s, 3H, OCH<sub>3</sub>), 7.00–7.05 (m, 5H), 7.11 (d,  $J_{\text{H,H}} = 9.0$  Hz, 1H), 7.30 (ddd,  $J_{\text{H,H}} = 8.0$  Hz,  $J_{\text{H,H}} = 6.8$  Hz,  $J_{\text{H,H}} = 7.4$  Hz, 1H), 7.32–7.36 (m, 2H), 7.47 (td,  $J_{\text{H,H}} = 7.2$  Hz,  $J_{\text{H,H}} = 2.1$  Hz, 1H), 7.49–7.54 (m, 3H), 7.75–7.77 (m, 2H). <sup>13</sup>C{<sup>1</sup>H} NMR (CDCl<sub>3</sub>,  $\delta$ ): 56.1 (OCH<sub>3</sub>), 113.1, 123.3, 124.4, 125.2, 126.2, 126.3, 127.1, 127.2, 127.7, 127.9, 128.6, 128.8, 129.0, 129.8, 131.9, 133.9, 134.8, 141.8, 143.0, 153.5.

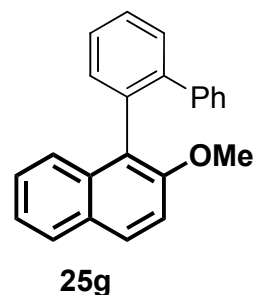

### 9-(2-Methoxy-1-naphthyl)phenanthrene (25h)

The title compound was obtained as a white solid from 2-methoxy-1-bromnaphthalene (235 mg) and 9-phenanthrylboronic acid (335 mg) by using the general procedure for Suzuki-Miyaura cross-coupling reactions and purified using a 98/2 (v/v) hexane/diethyl ether mixture. The

analytical data are in agreement with literature. Yield: 145 mg (43 % based on the aryl halide).  $^1\text{H}$  NMR ( $\text{CDCl}_3$ ,  $\delta$ ): 3.78 (s, 3H,  $\text{OCH}_3$ ), 7.22 (ddd,  $J_{\text{H,H}} = 8.6$  Hz,  $J_{\text{H,H}} = 6.6$  Hz,  $J_{\text{H,H}} = 1.3$  Hz, 1H), 7.29–7.31 (m, 1H), 7.34 (ddd,  $J_{\text{H,H}} = 8.1$  Hz,  $J_{\text{H,H}} = 6.6$ ,  $J_{\text{H,H}} = 1.2$ , 1H), 7.39–7.40 (m, 2H), 7.48 (d,  $J_{\text{H,H}} = 9.0$ , 1H), 7.62–7.66 (m, 2H), 7.71 (ddd,  $J_{\text{H,H}} = 8.4$  Hz,  $J_{\text{H,H}} = 6.9$  Hz,  $J_{\text{H,H}} = 1.3$  Hz, 1H), 7.73 (s, 1H), 7.89–7.91 (m, 2H), 8.01 (d,  $J_{\text{H,H}} = 9.0$  Hz, 1H), 8.81 (t,  $J_{\text{H,H}} = 7.8$  Hz, 2H).  $^{13}\text{C}\{^1\text{H}\}$  NMR ( $\text{CDCl}_3$ ,  $\delta$ ): 56.8 ( $\text{OCH}_3$ ), 113.9, 122.6, 122.8, 123.2, 123.6, 125.5, 126.45, 126.52, 126.54, 126.6, 126.8, 127.8, 128.7, 129.1, 129.6, 130.3, 130.5, 131.9, 132.1, 133.2, 134.3, 154.8. HRMS (ESI-TOF,  $m/z$ ): calcd. for  $\text{C}_{25}\text{H}_{18}\text{O}+\text{Na}$  357.1250, found 357.1247  $[\text{M}+\text{Na}]^+$ .

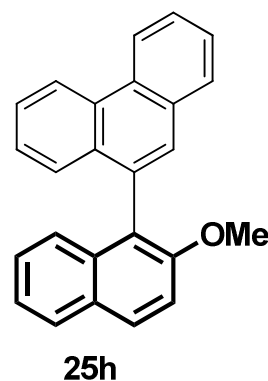

<sup>1</sup> Sheldrick, G. M.; *Acta Cryst. Sect. A* **1990**, *46*, 467. Sheldrick, G. M.; *SHELXL-97, Program for Crystal Structure Refinement*, **1997**, Universität Göttingen.

<sup>2</sup> Nesmejanow, A. N.; Ssasonowa, W.A.; Drosd, V. N. *Chem. Berichte*. **1960**, *96*, 2717–2729.

<sup>3</sup> Schaarschmidt, D.; Lang, H. *Organometallics* **2010**, *29*, 4196–4198.

<sup>4</sup> Ferrocenylphosphine was synthesized in accordance to literature. Henderson, W.; Alley, S. R. *J. Organomet. Chem.* **2002**, *656*, 120–128. Excess of  $\text{Li}[\text{AlH}_4]$  was destroyed by adding oxygen-free water followed by oxygen-free sulfuric acid ( $w = 30\%$ ). The mixture was extracted with oxygen-free ether under argon atmosphere and the organic layer was washed with oxygen-free water. After filtration through a plug of  $\text{MgSO}_4$  (minimum 5 cm thickness) the solvent was removed under reduced pressure to afford the phosphine as an orange oil, which crystallizes after several hours.

<sup>5</sup> Guillaneux, D.; Kagan H. B. *J. Org. Chem.* **1995**, *60*, 2502–2505.

<sup>6</sup> Denis, J. M.; Forintos, H.; Szelkeb, H.; Keglevich, G. *Tetrahedron Lett.* **2002**, *43*, 5569–5571.

<sup>7</sup> Su, W.; Urgaonkar, S.; McLaughlin, P. A.; Verkade, J. G. *J. Am. Chem. Soc.* **2004**, *126*, 16433–16439.

<sup>8</sup> Cammidge, A. N.; Goddard, V. H. M.; Gopee, H.; Harrison, N. L.; Hughes, D. L.; Schubert, C. J.; Sutton, B. M.; Watts, G. L.; Whitehead, A. J. *Org. Lett.* **2006**, *8*, 4071–4074.

<sup>9</sup> Tu, T.; Sun, Z.; Fang, W.; Xu, M.; Zhou, Y. *Org. Lett.* **2012**, *14*, 4250–4253.

<sup>10</sup> Terao, Y.; Wakui, H.; Nomoto, M.; Satoh, T.; Miura, M.; Nomura M. *J. Org. Chem.* **2003**, *68*, 5236–5243.

# <sup>1</sup>H and <sup>13</sup>C NMR spectra of the new compounds

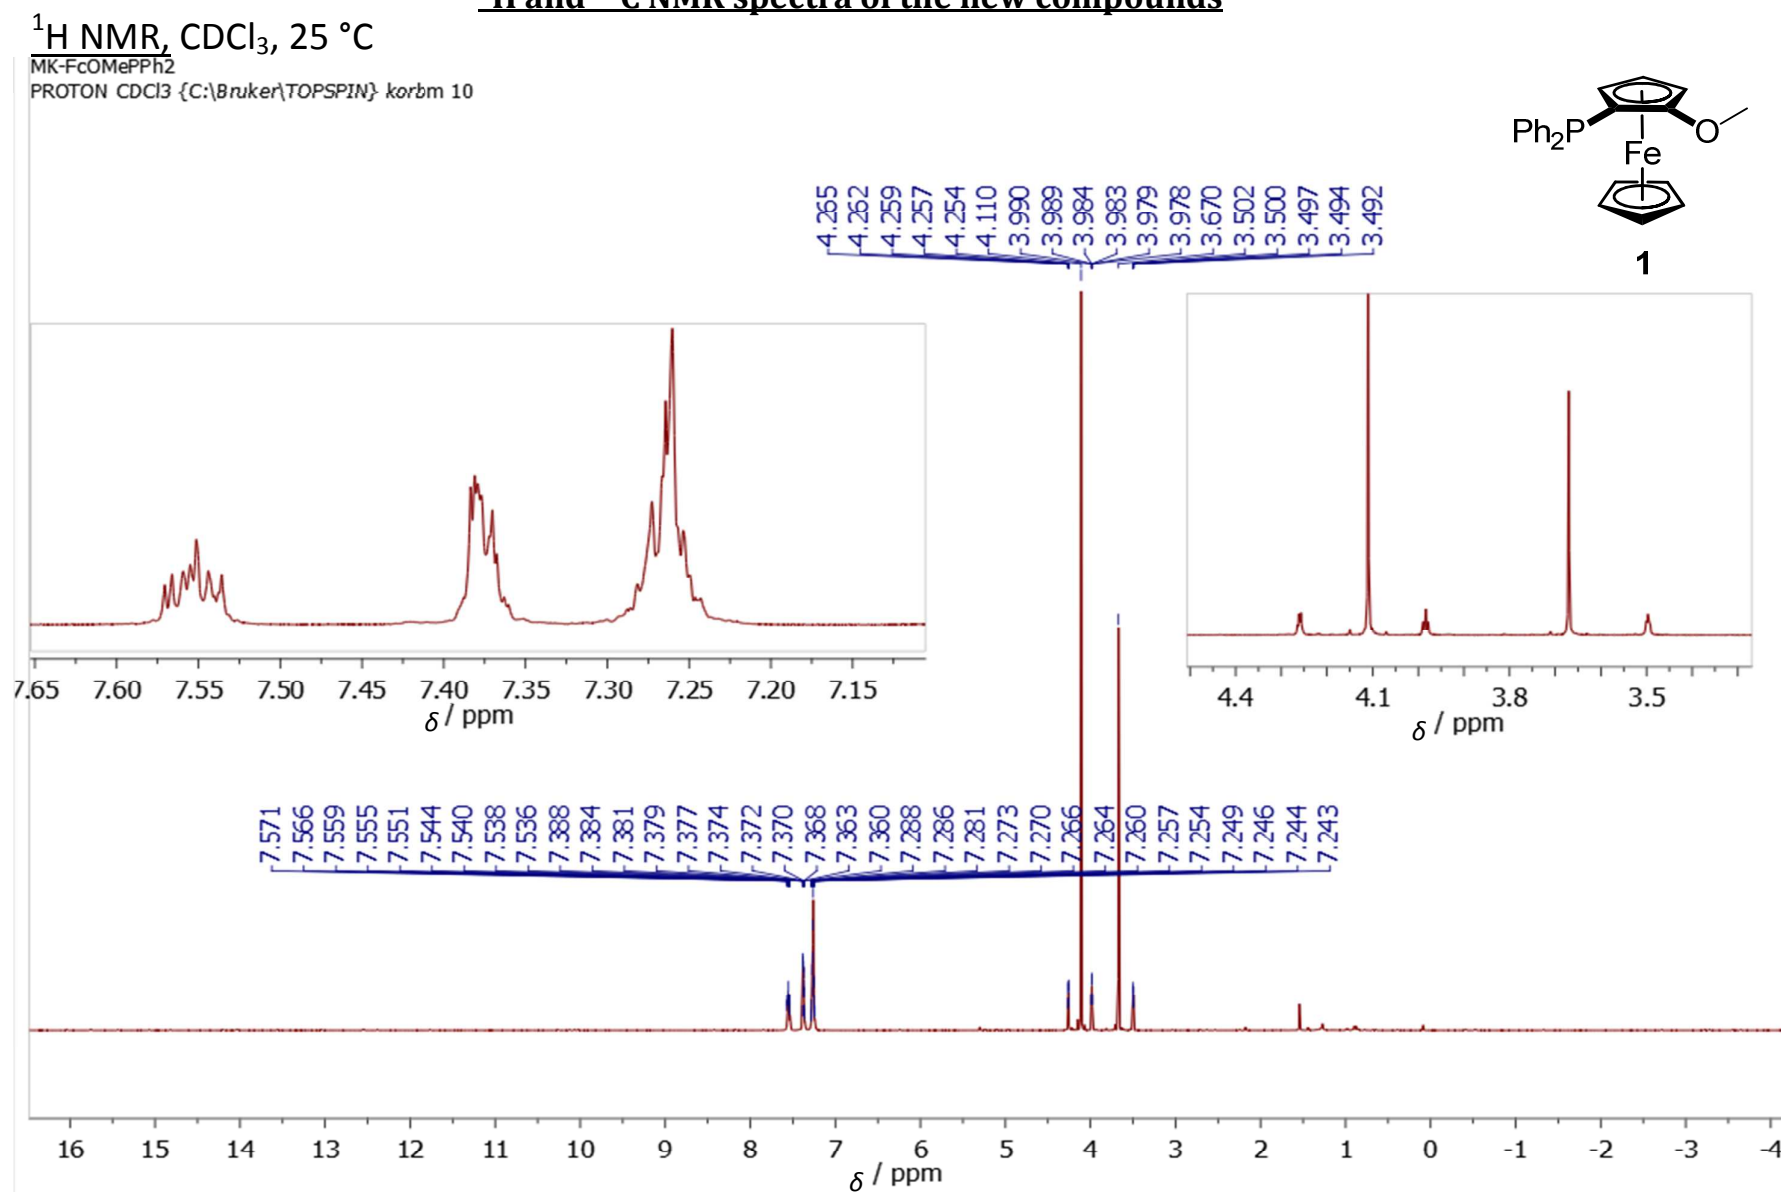

MK-FcOMePPh2  
C13CPD CDCl3 {C:\Bruker\TOPSPIN} korbm 10

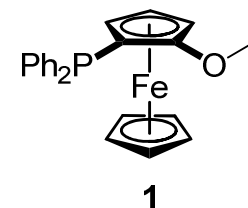

$^1\text{H}$  NMR,  $\text{CDCl}_3$ , 25 °C

MK-204-test2  
PROTON

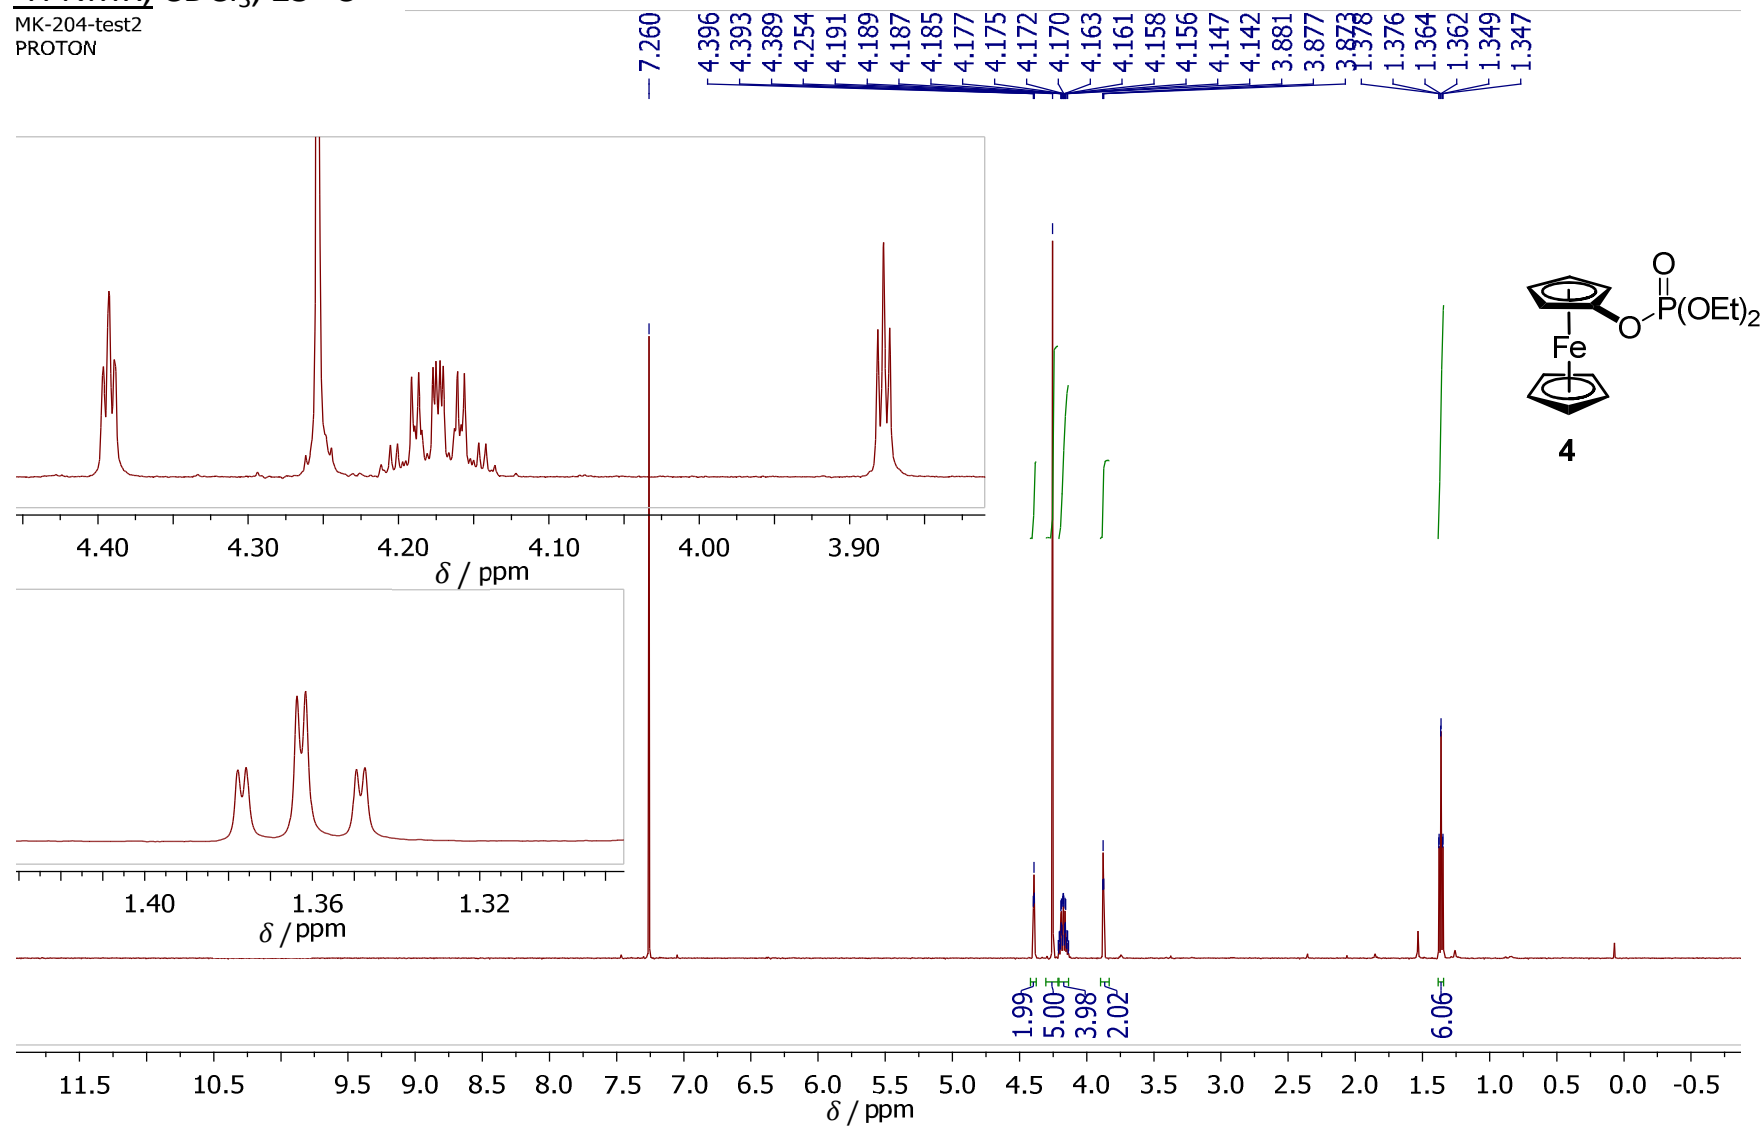

ՄԿ-204  
C13CPD ՀԾԾԻՂ (C:\Program\TSPFBI\W) հետևի՞ր 0

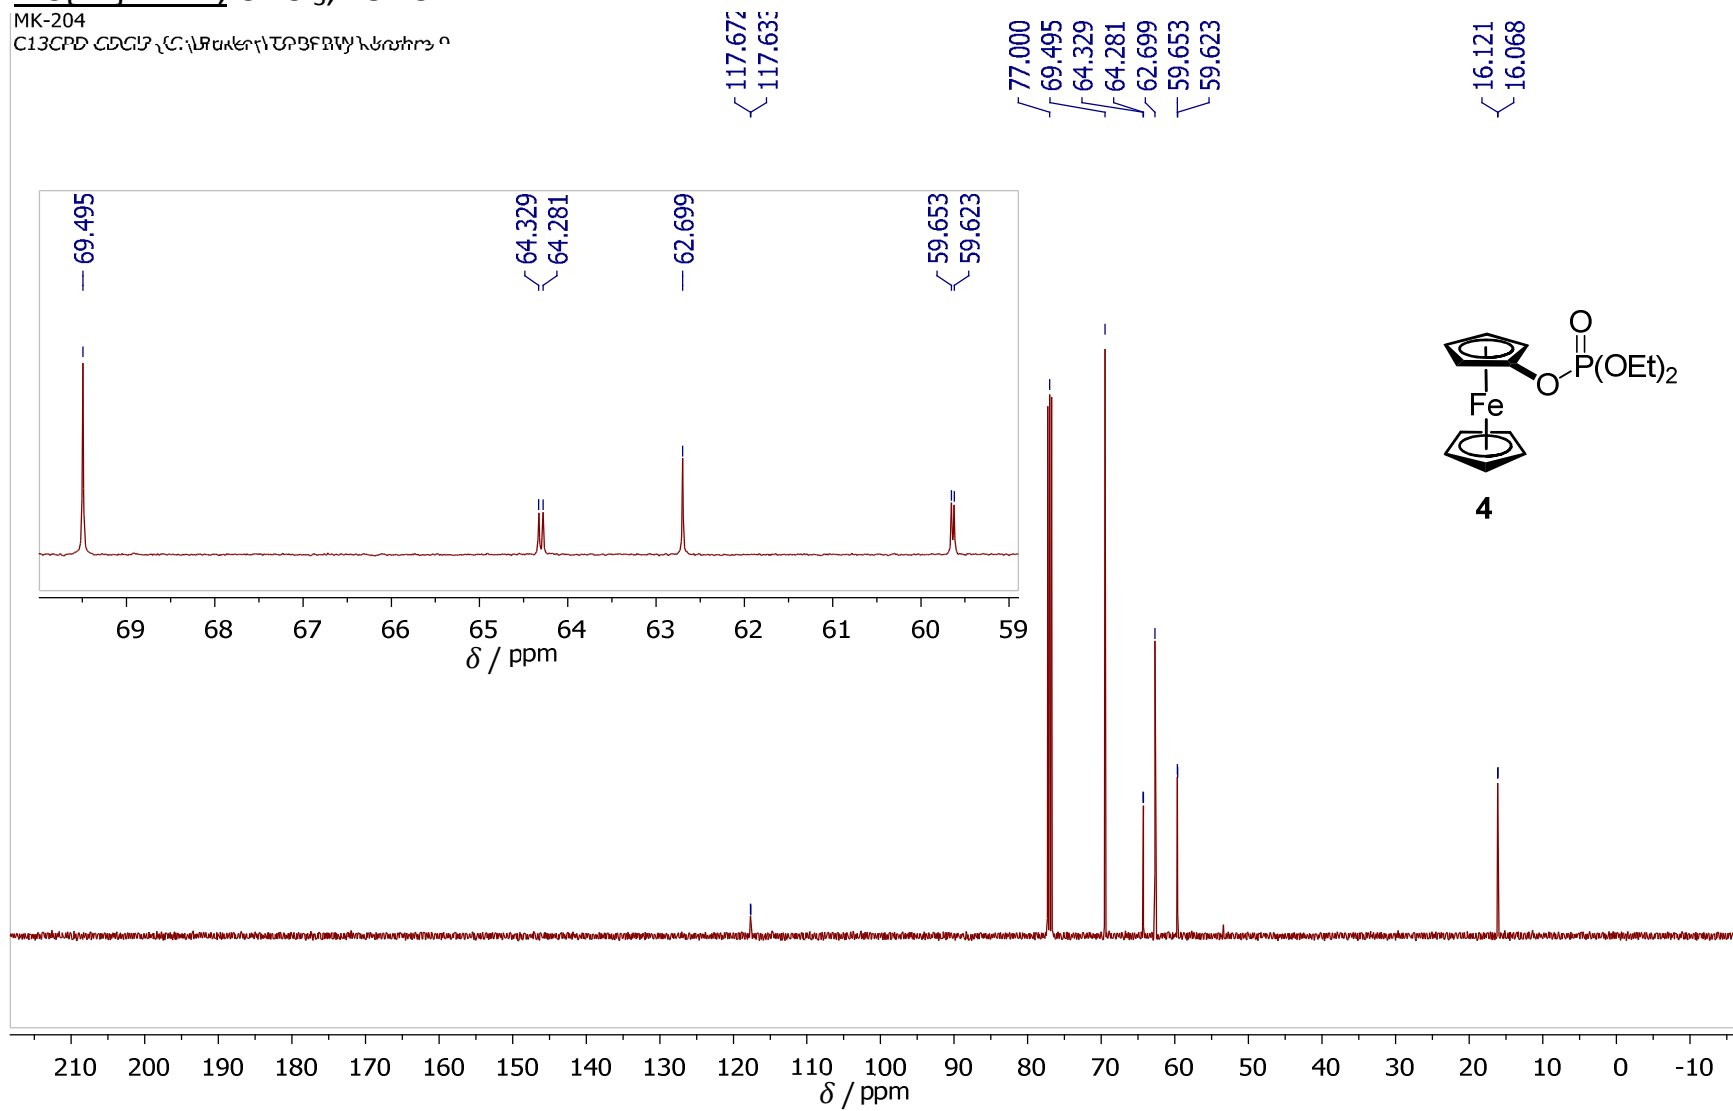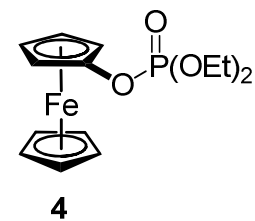

<sup>1</sup>H NMR, CDCl<sub>3</sub>, 25 °C

MK-230-F1  
PROTON CDCl<sub>3</sub> {C:\Bruker\TOPSPIN} korbm 50

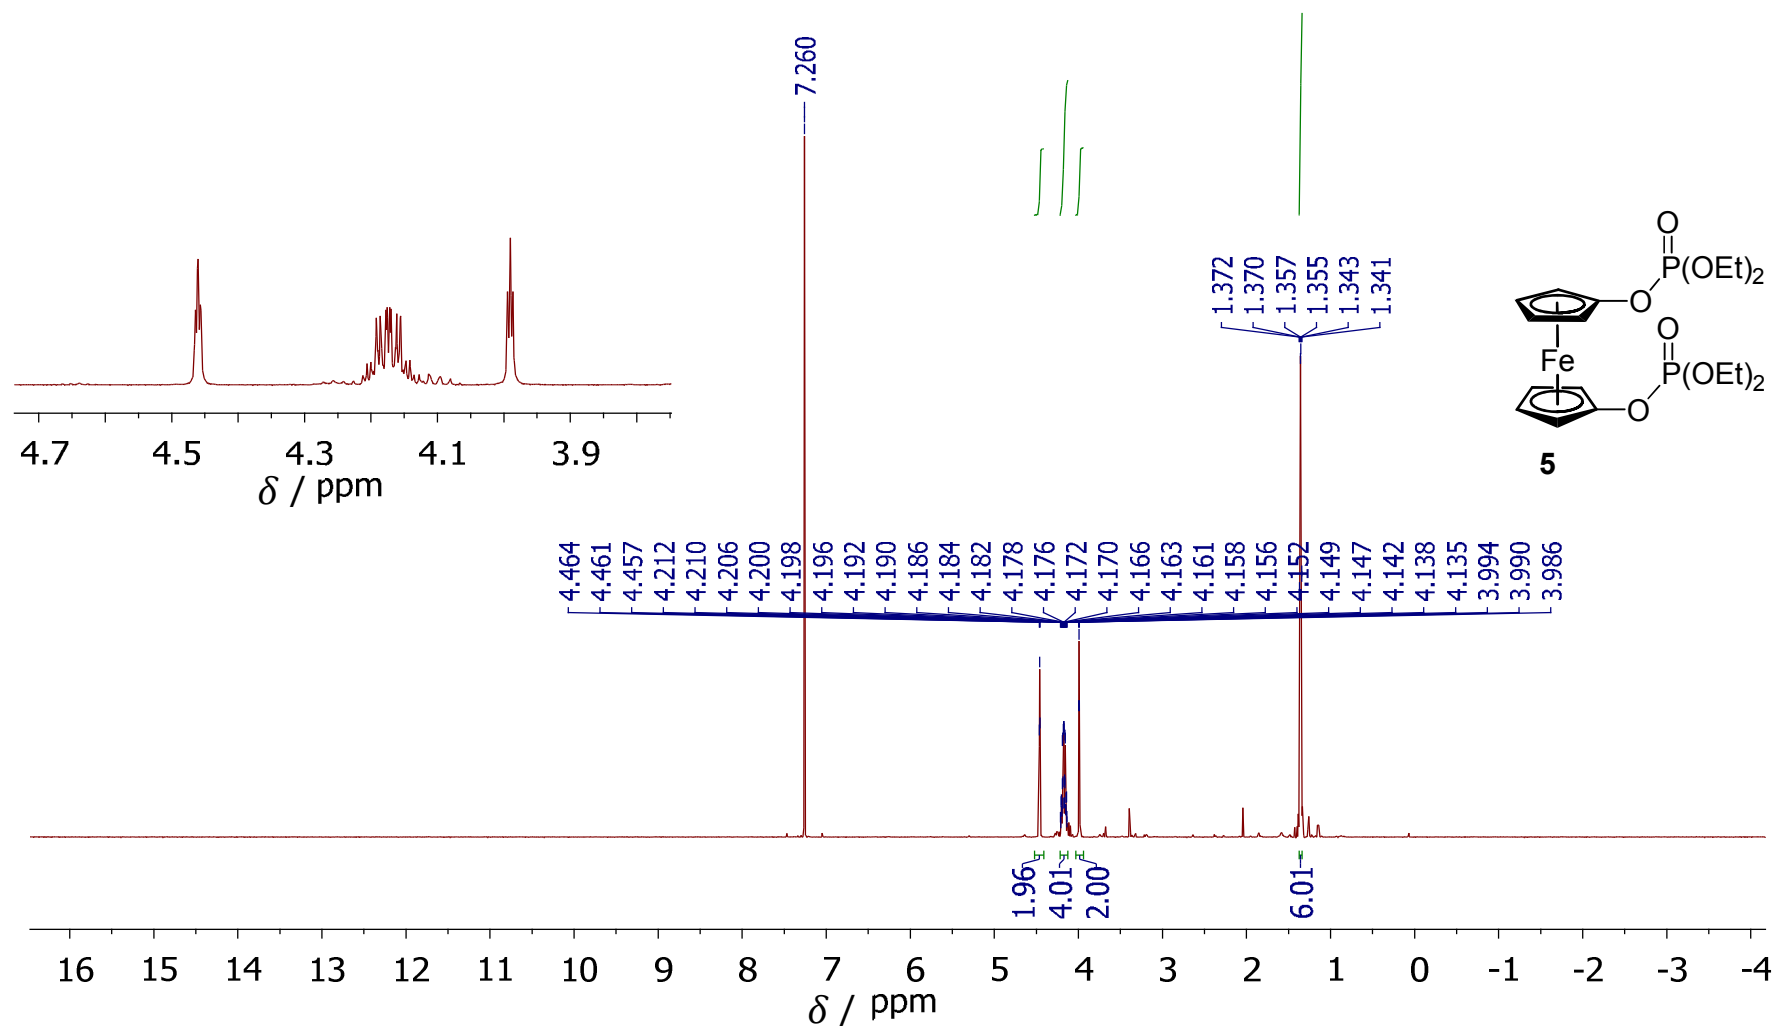

$^{13}\text{C}\{^1\text{H}\}$  NMR,  $\text{CDCl}_3$ , 25 °C

MK-230-F1

C13CPD  $\text{CDCl}_3$  {C:\Bruker\TOPSPIN} korbm 50

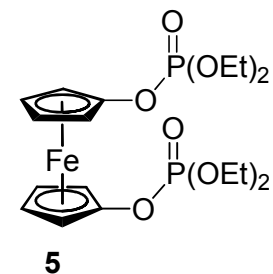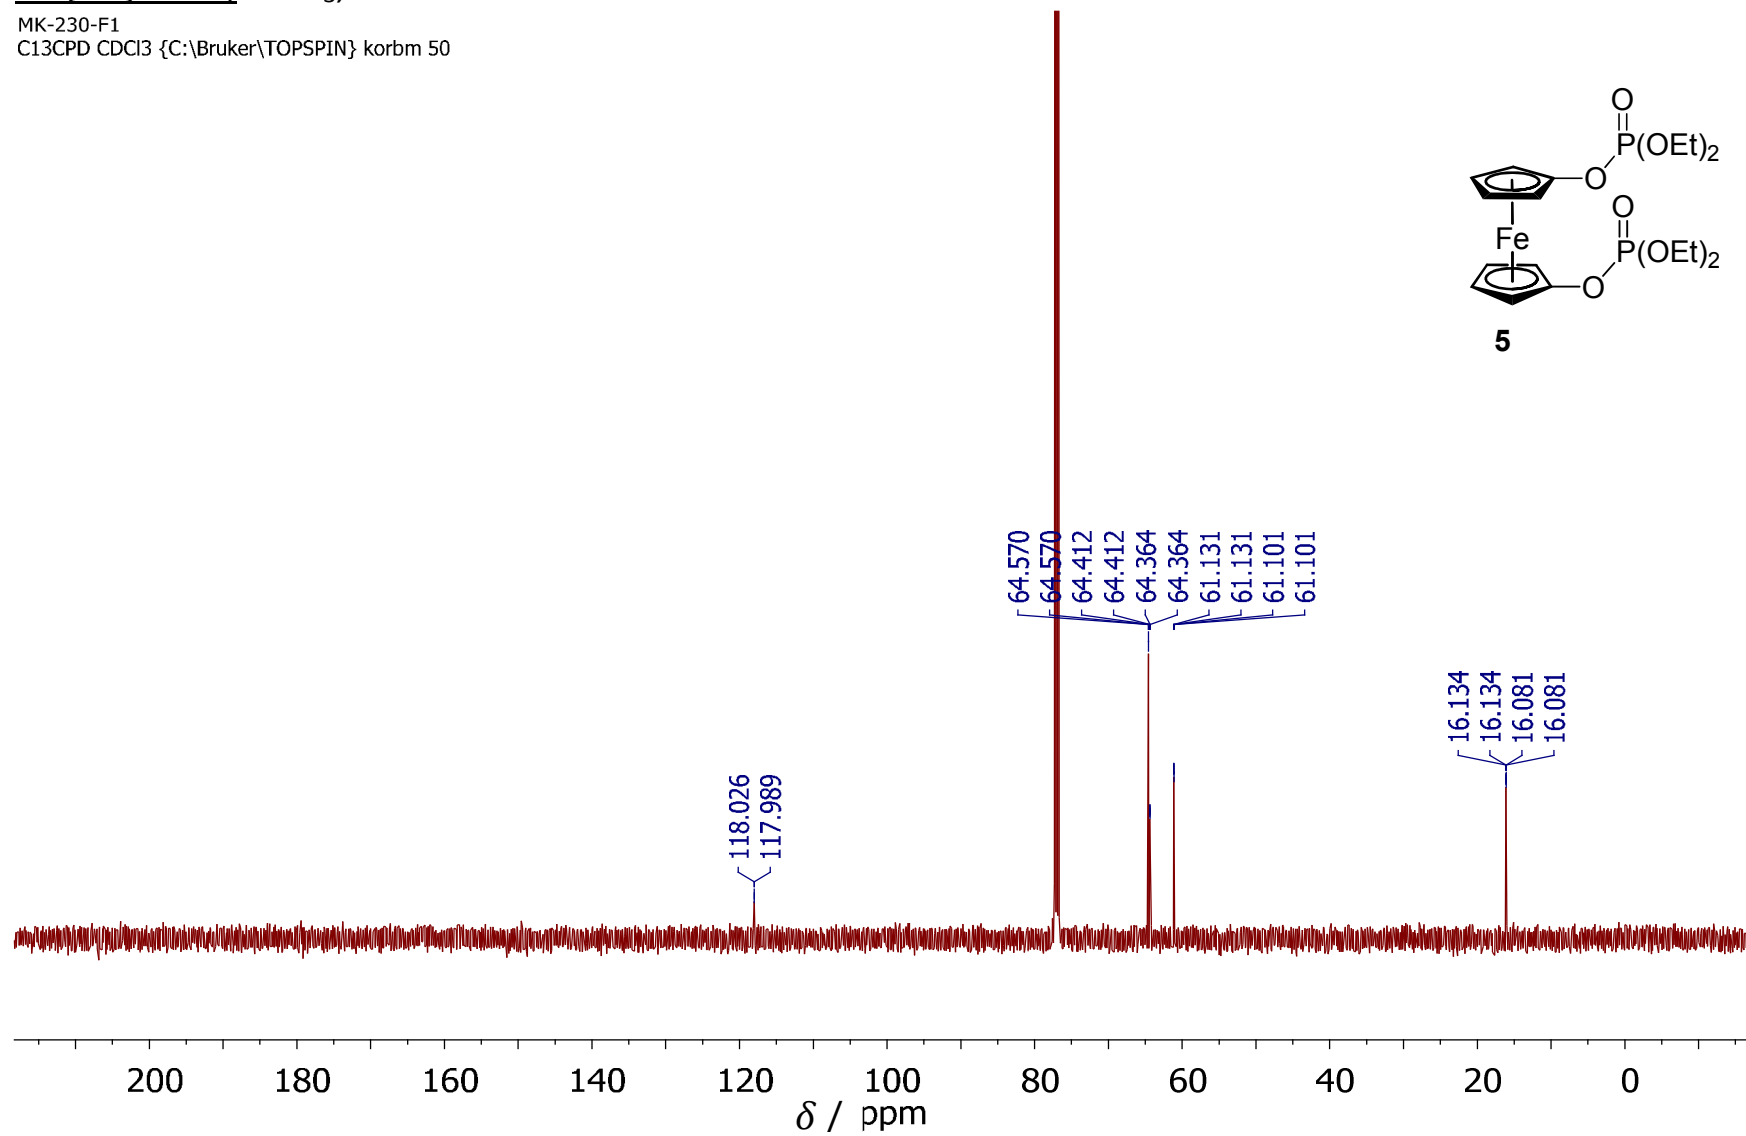

$^1\text{H}$  NMR,  $\text{CDCl}_3$ , 25 °C

MK-208

PROTON  $\text{CDCl}_3$  {C:} 120.000 Hz, 25.00 °C

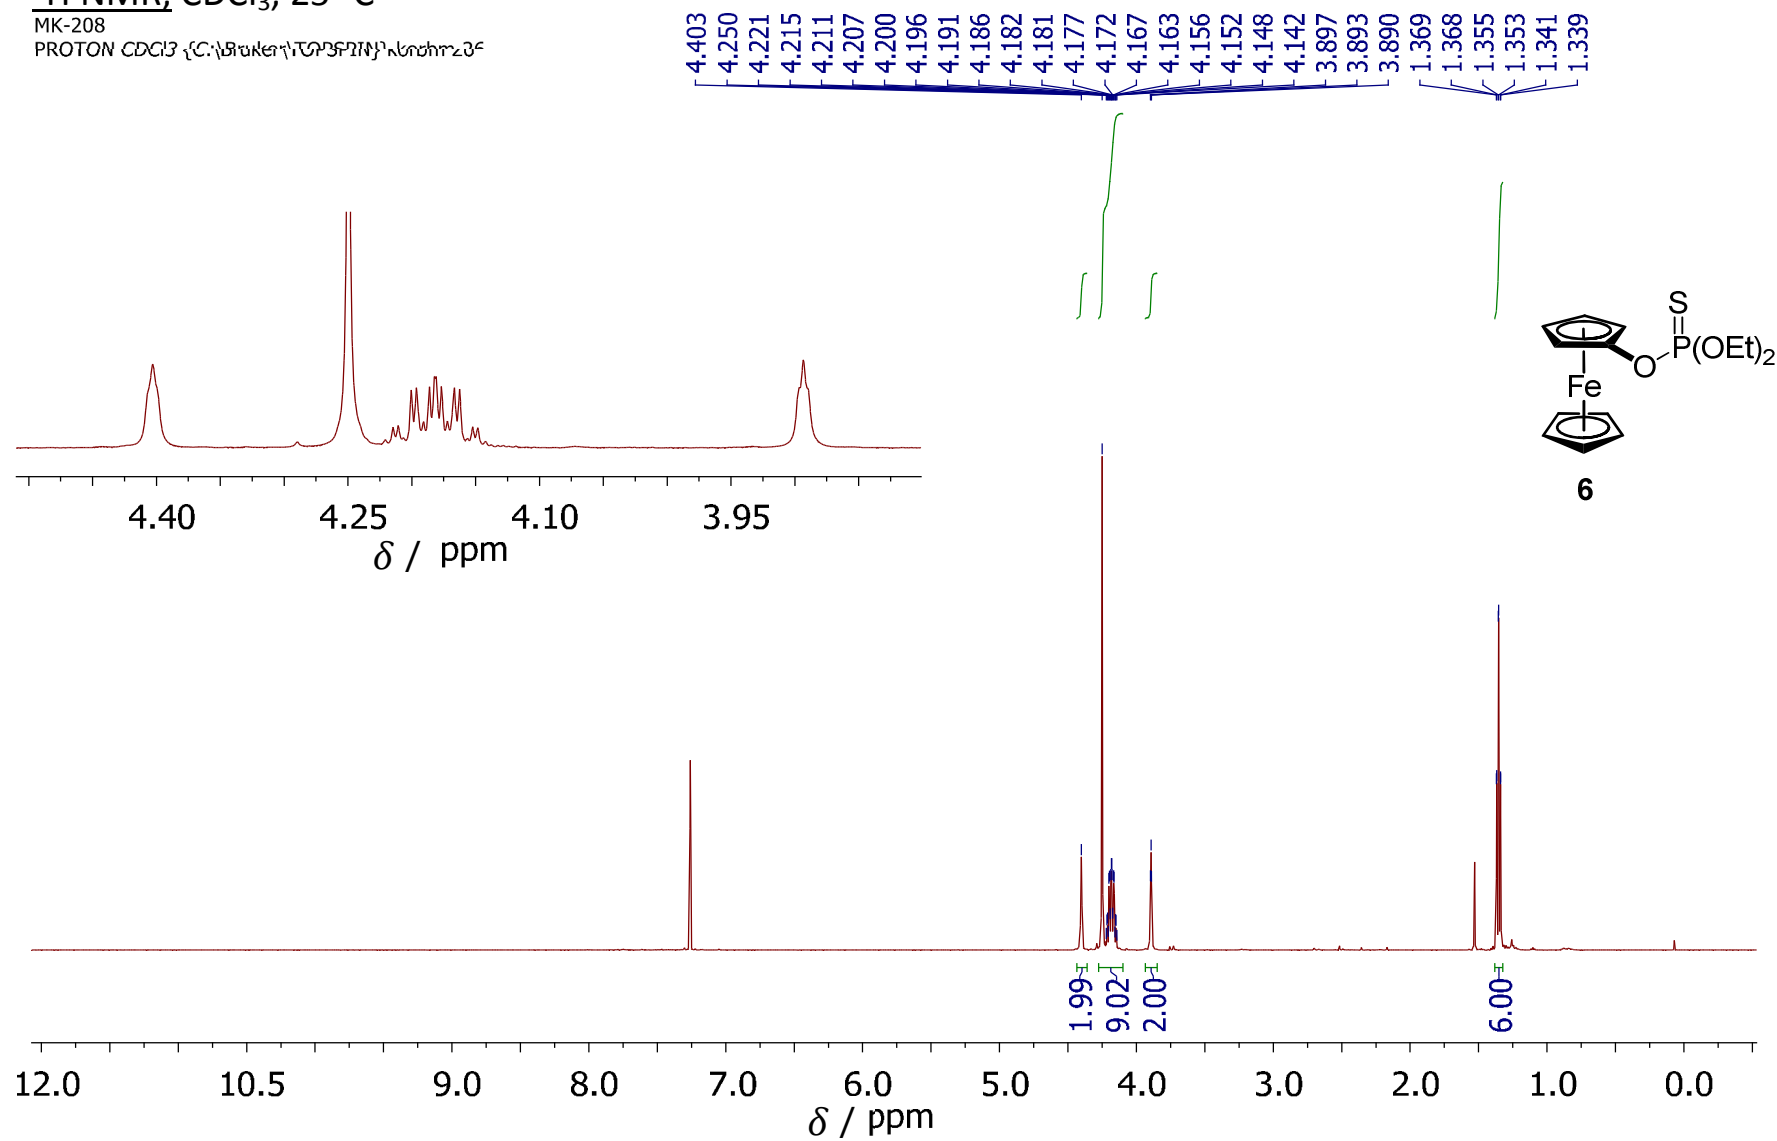

$^{13}\text{C}\{^1\text{H}\}$  NMR,  $\text{CDCl}_3$ , 25 °C

MK-208-Tol  
C13CPD  $\text{CDCl}_3$  {C:\Bruker\TOPSPIN} korbm 13

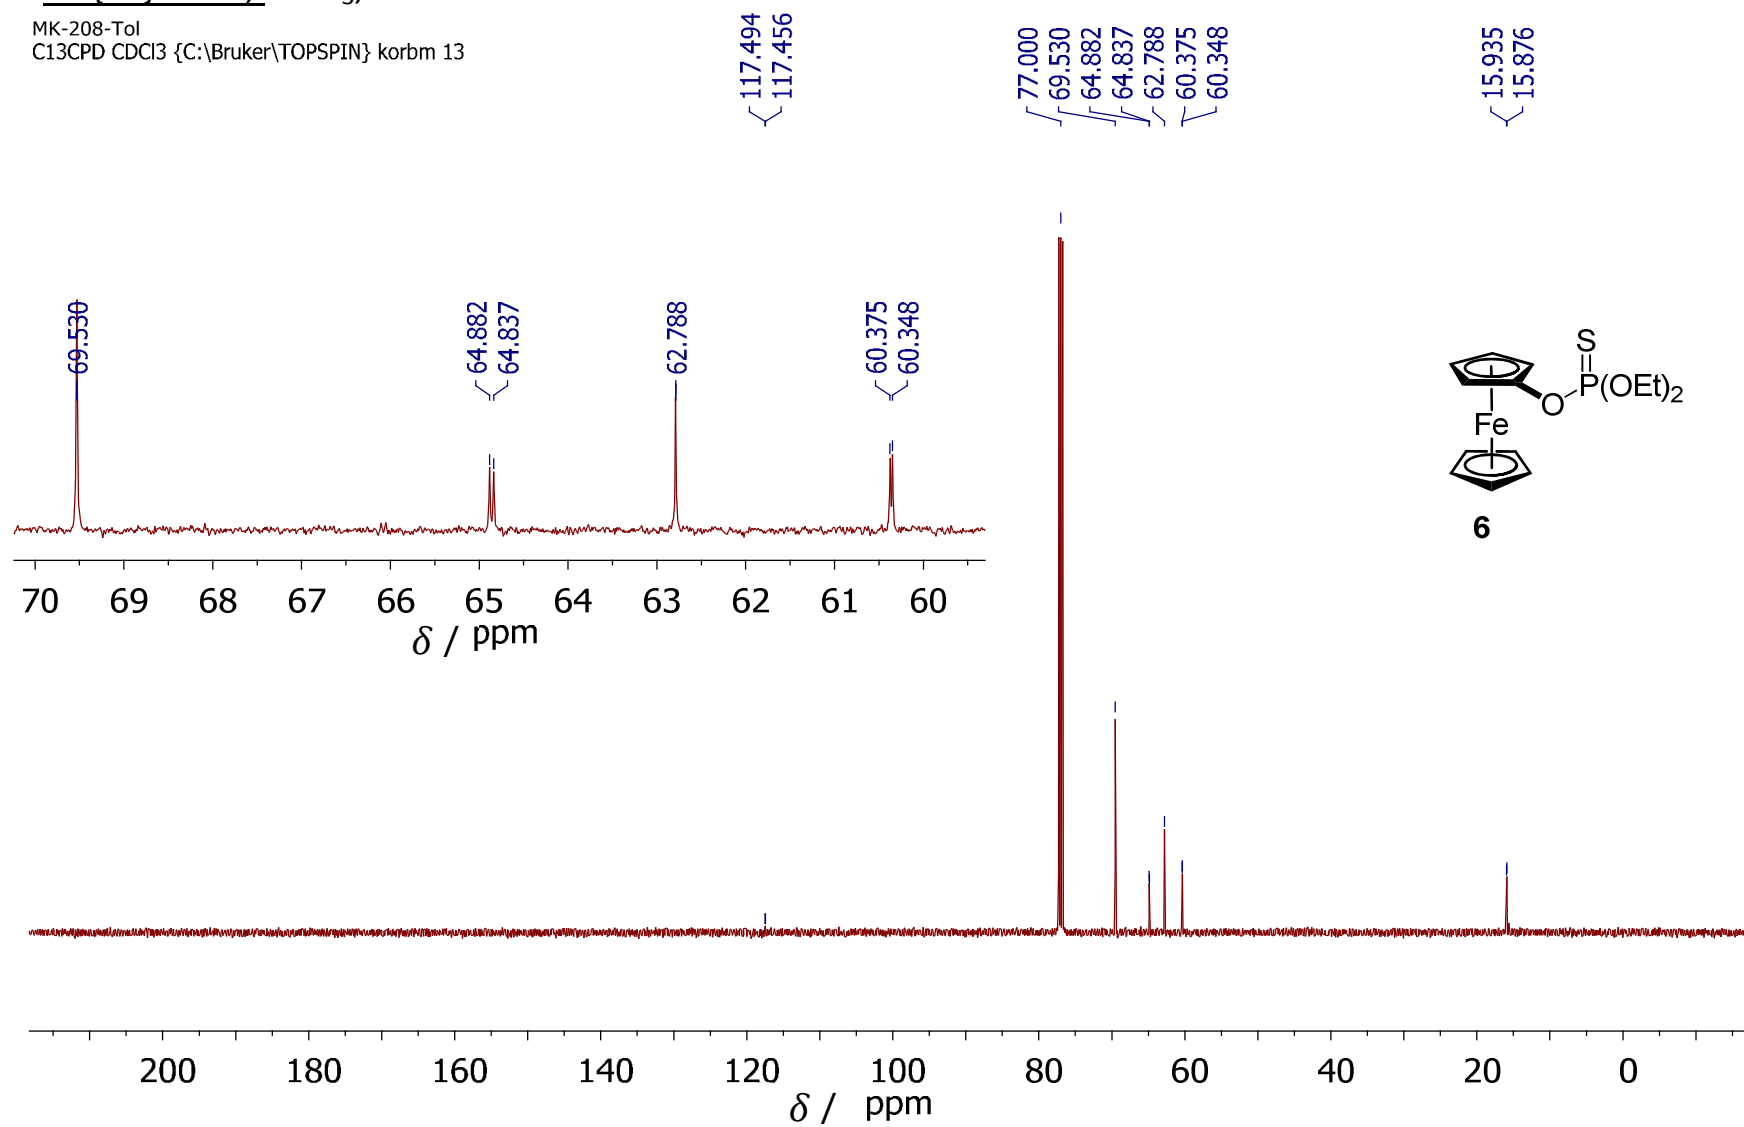

$^1\text{H}$  NMR,  $\text{C}_6\text{D}_6$ , 25 °C

MK-306-2

PROTON C6D6 {C:\Bruker\TOPSPIN} korbm 50

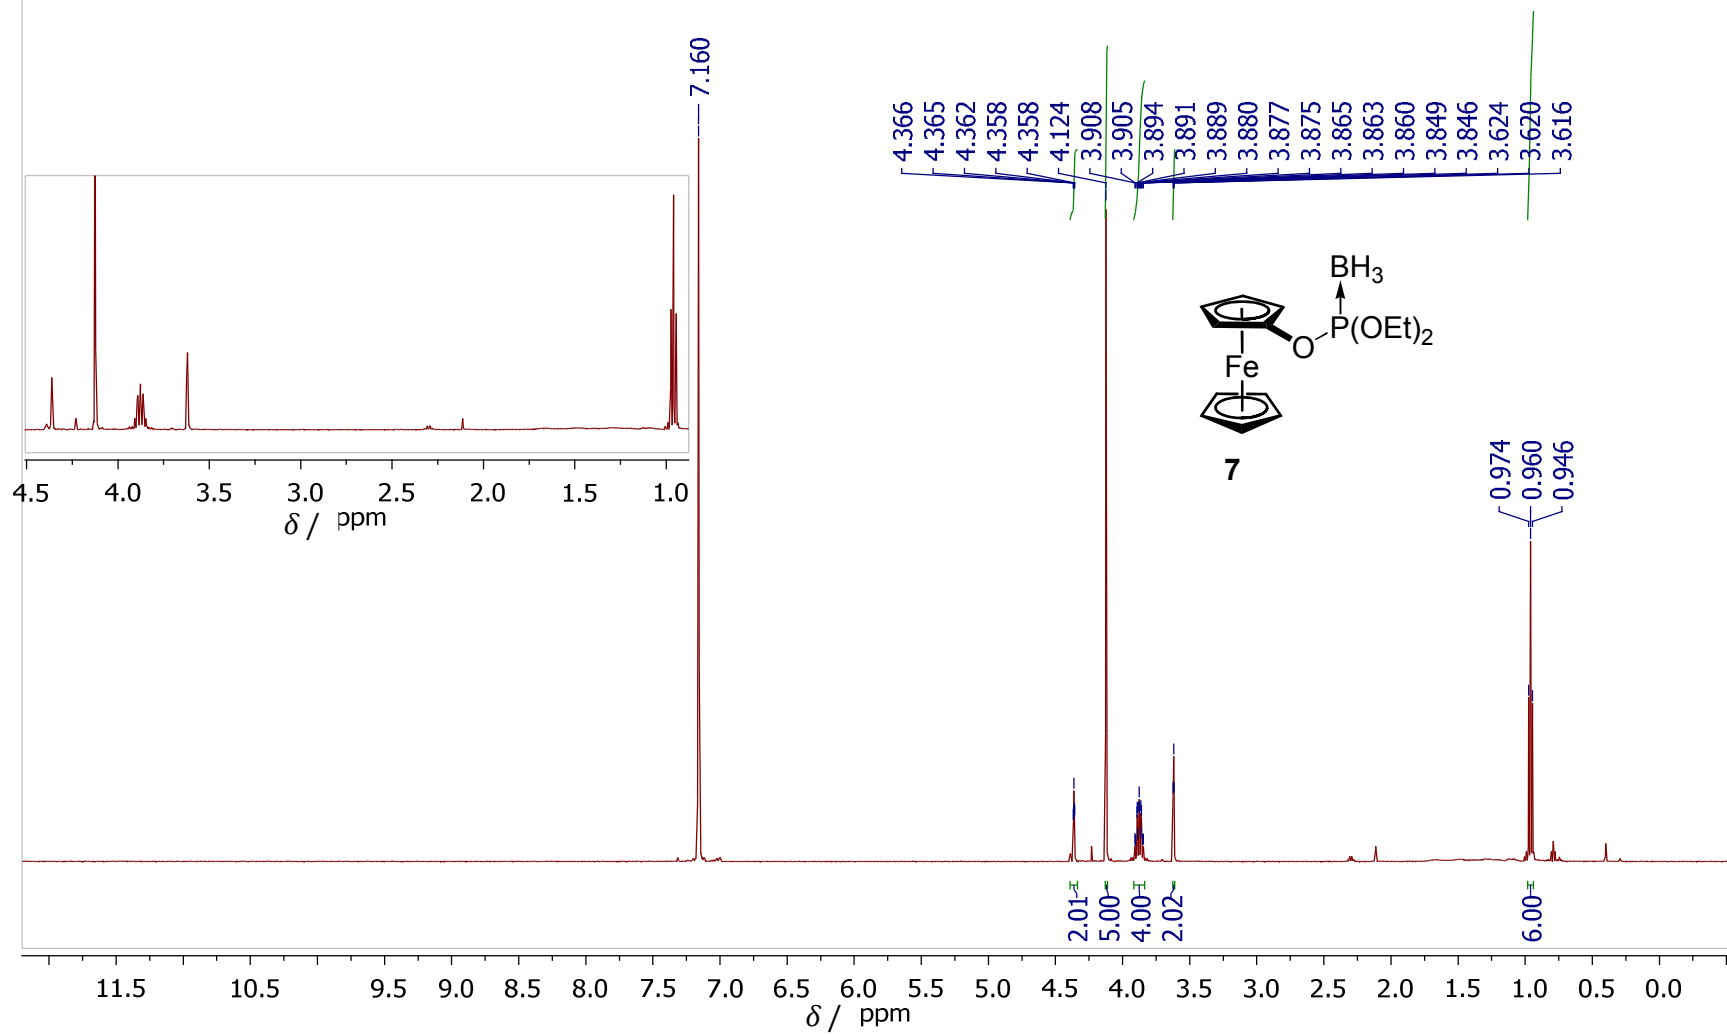

$^{13}\text{C}\{^1\text{H}\}$  NMR,  $\text{C}_6\text{D}_6$ , 25 °C

MK-306-2

C13CPD C6D6 {C:\Bruker\1\CPSPIN} kurdüm 51

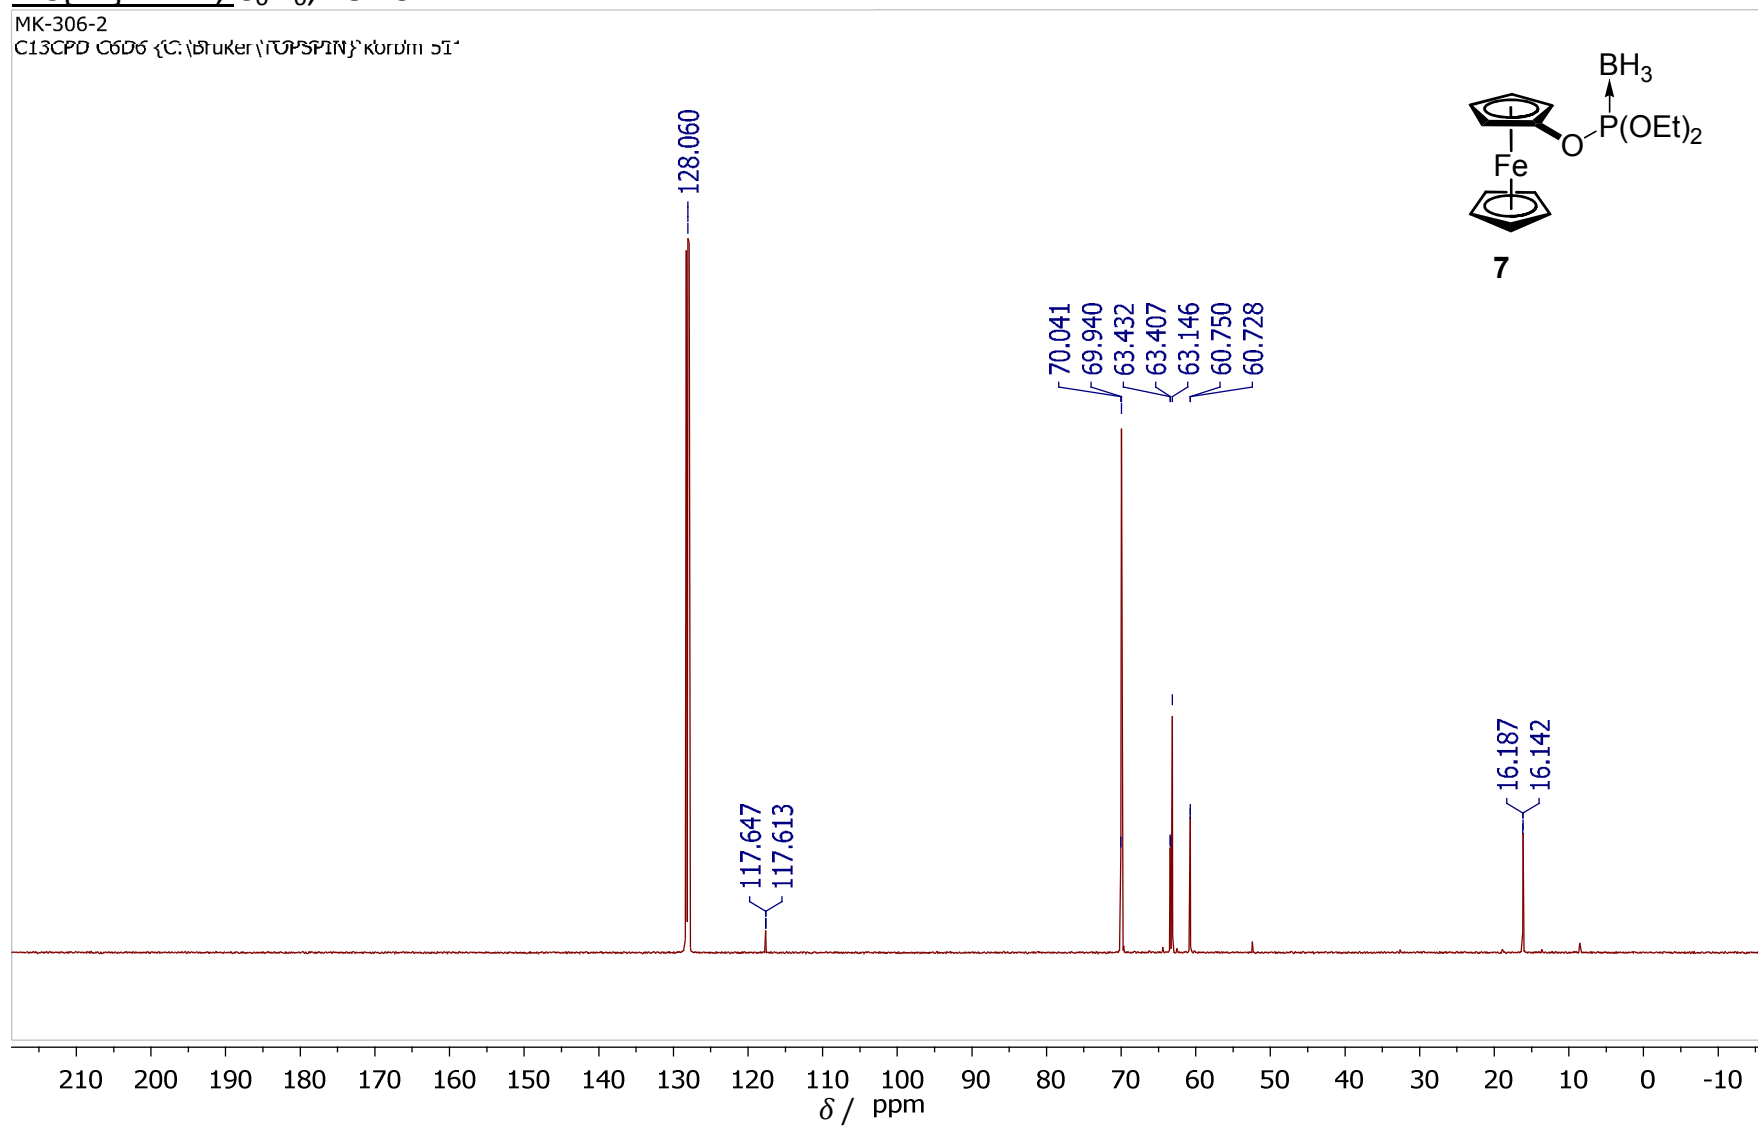

$^1\text{H}$  NMR,  $\text{CDCl}_3$ , 25 °C

MK-209

PROTON  $\text{CDCl}_3$  {C:\Bruker\TOPSPIN\kondm...

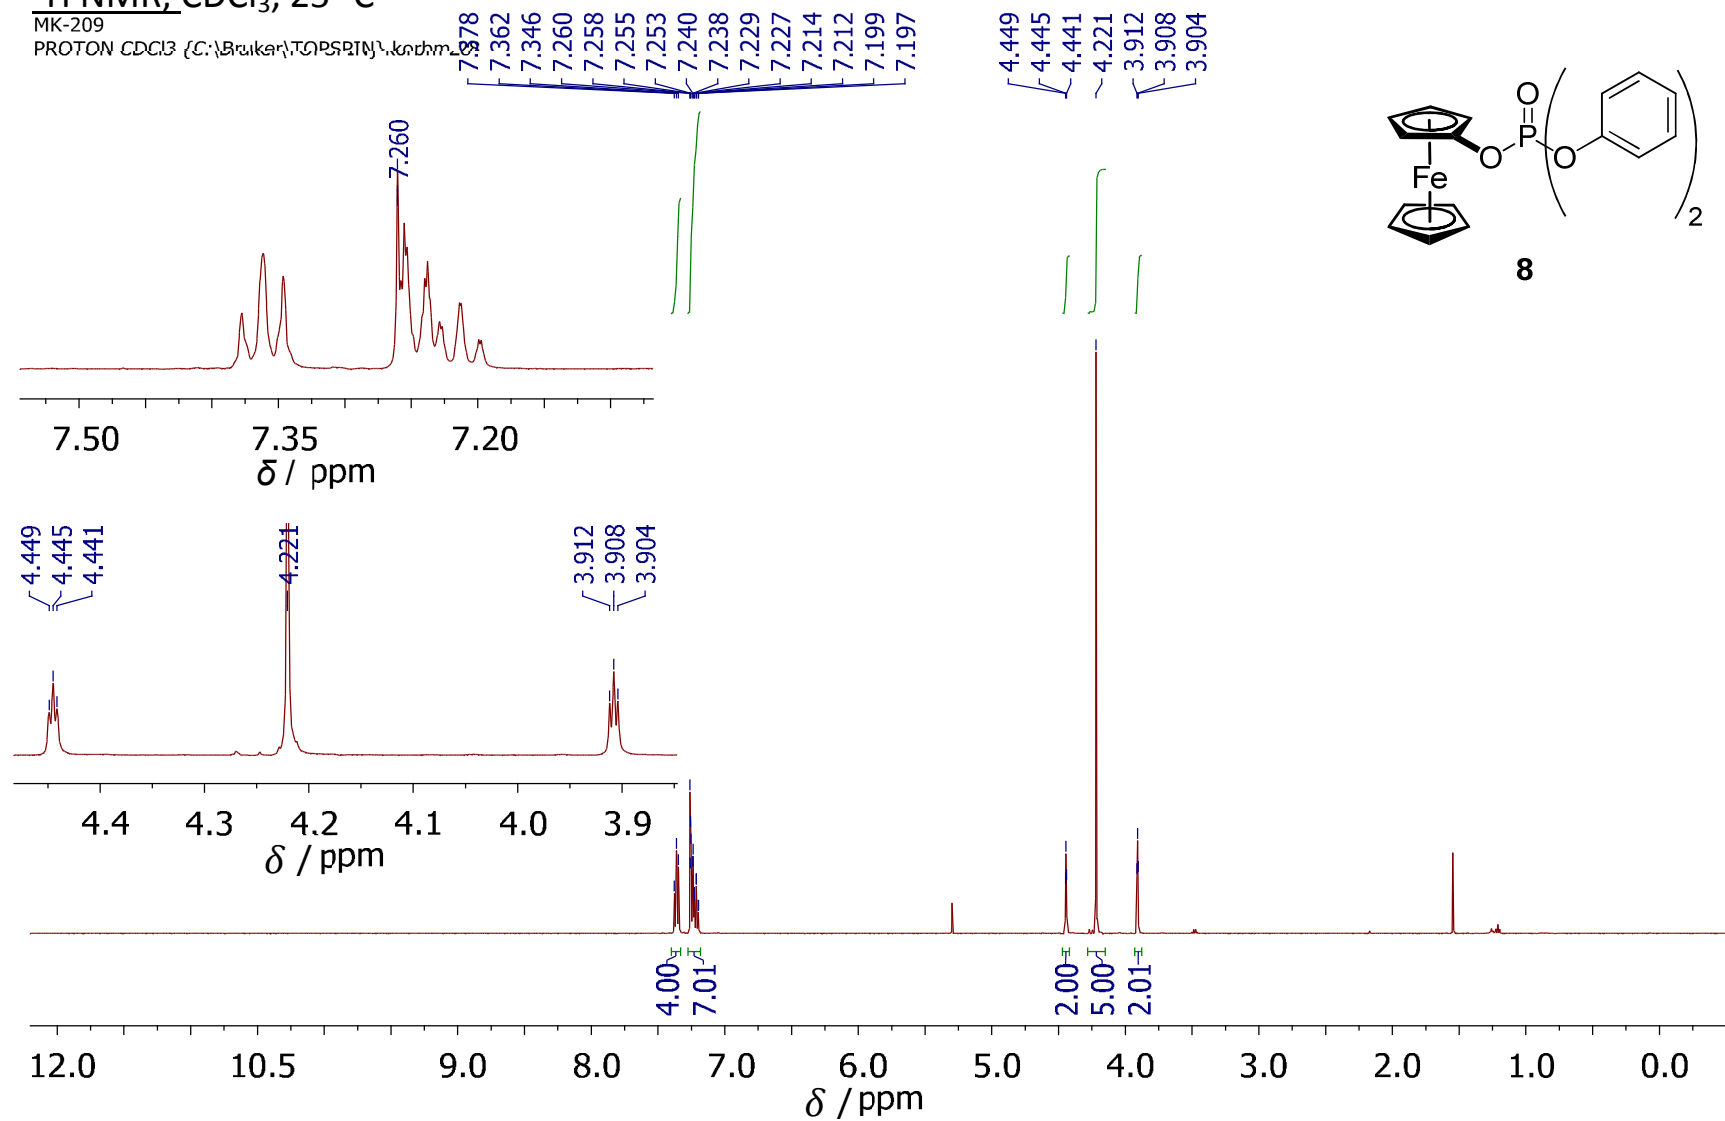

$^{13}\text{C}\{^1\text{H}\}$  NMR,  $\text{CDCl}_3$ , 25 °C

MK-209  
C13CPD  $\text{CDCl}_3$  {C:\Bruker\TOPSPIN} korbm 28

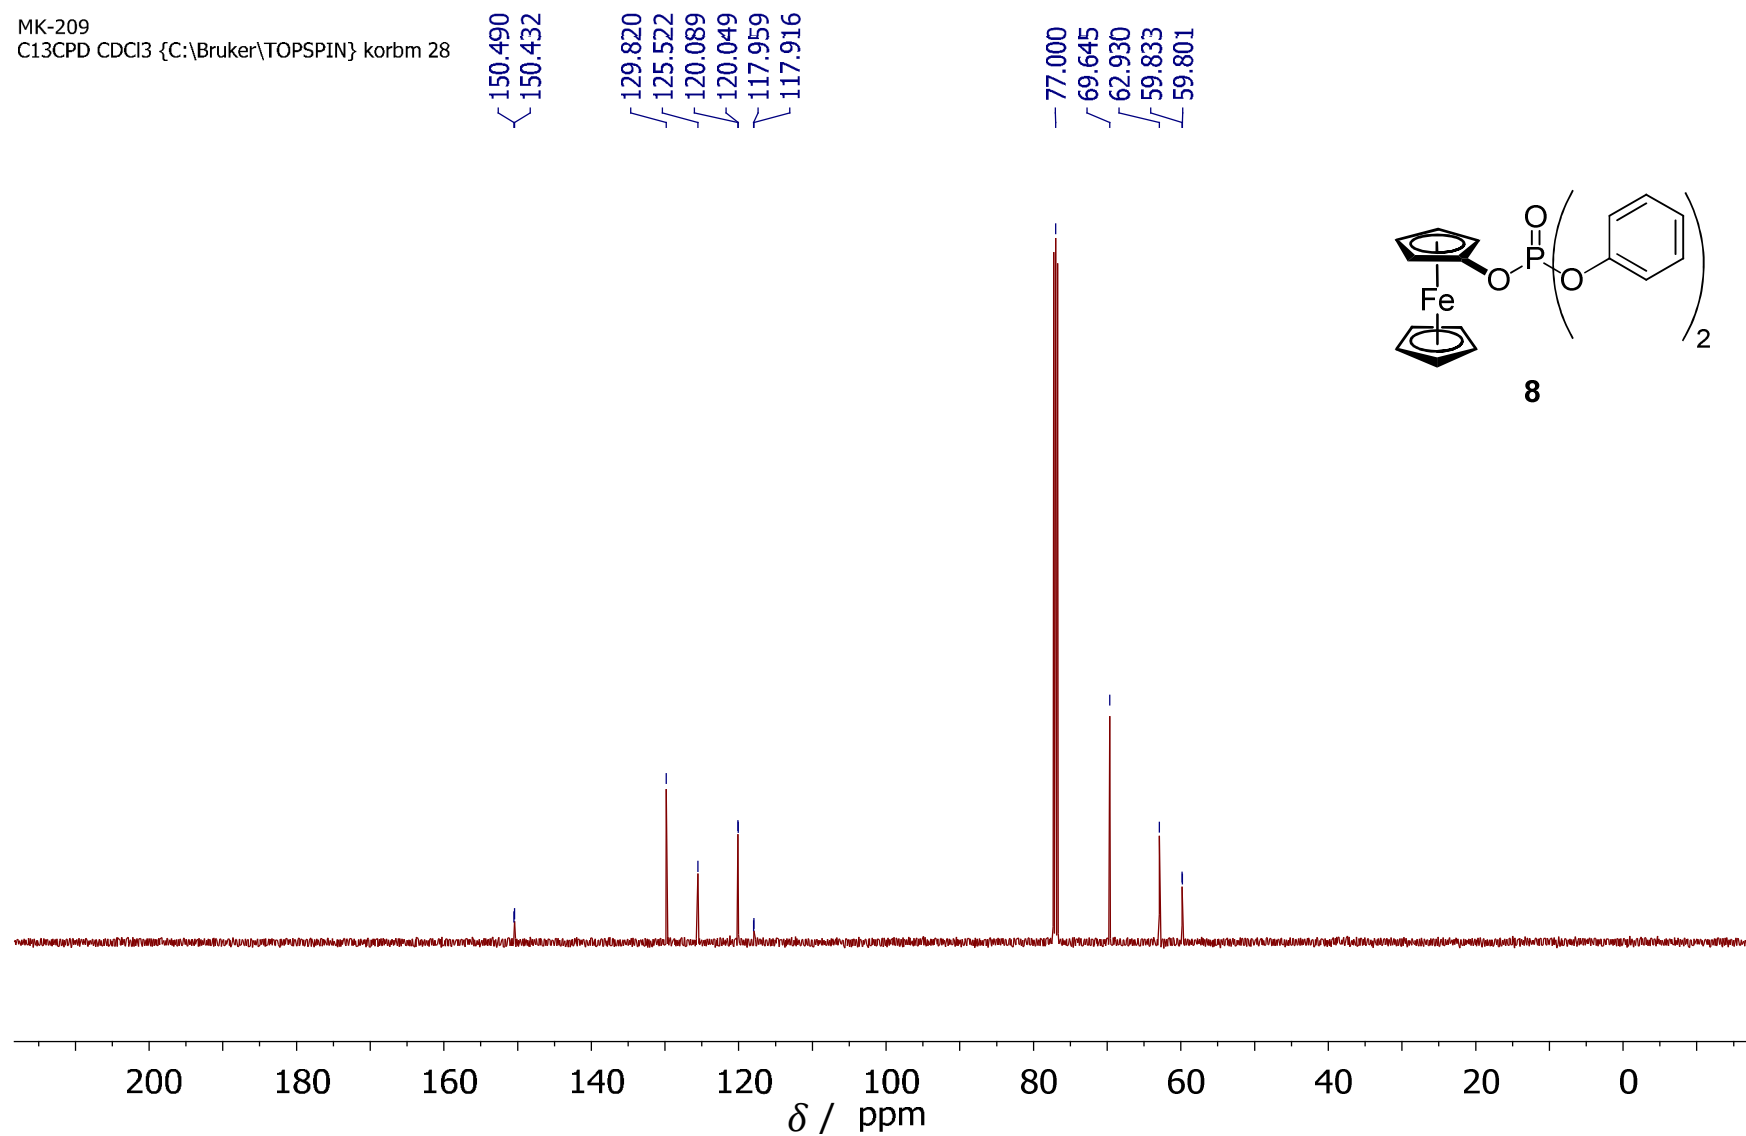

$^1\text{H}$  NMR,  $\text{CDCl}_3$ , 25 °C

MK-211

PROTON  $\text{CDCl}_3$  {C:\Bruker\TOPSPIN} korbm 15

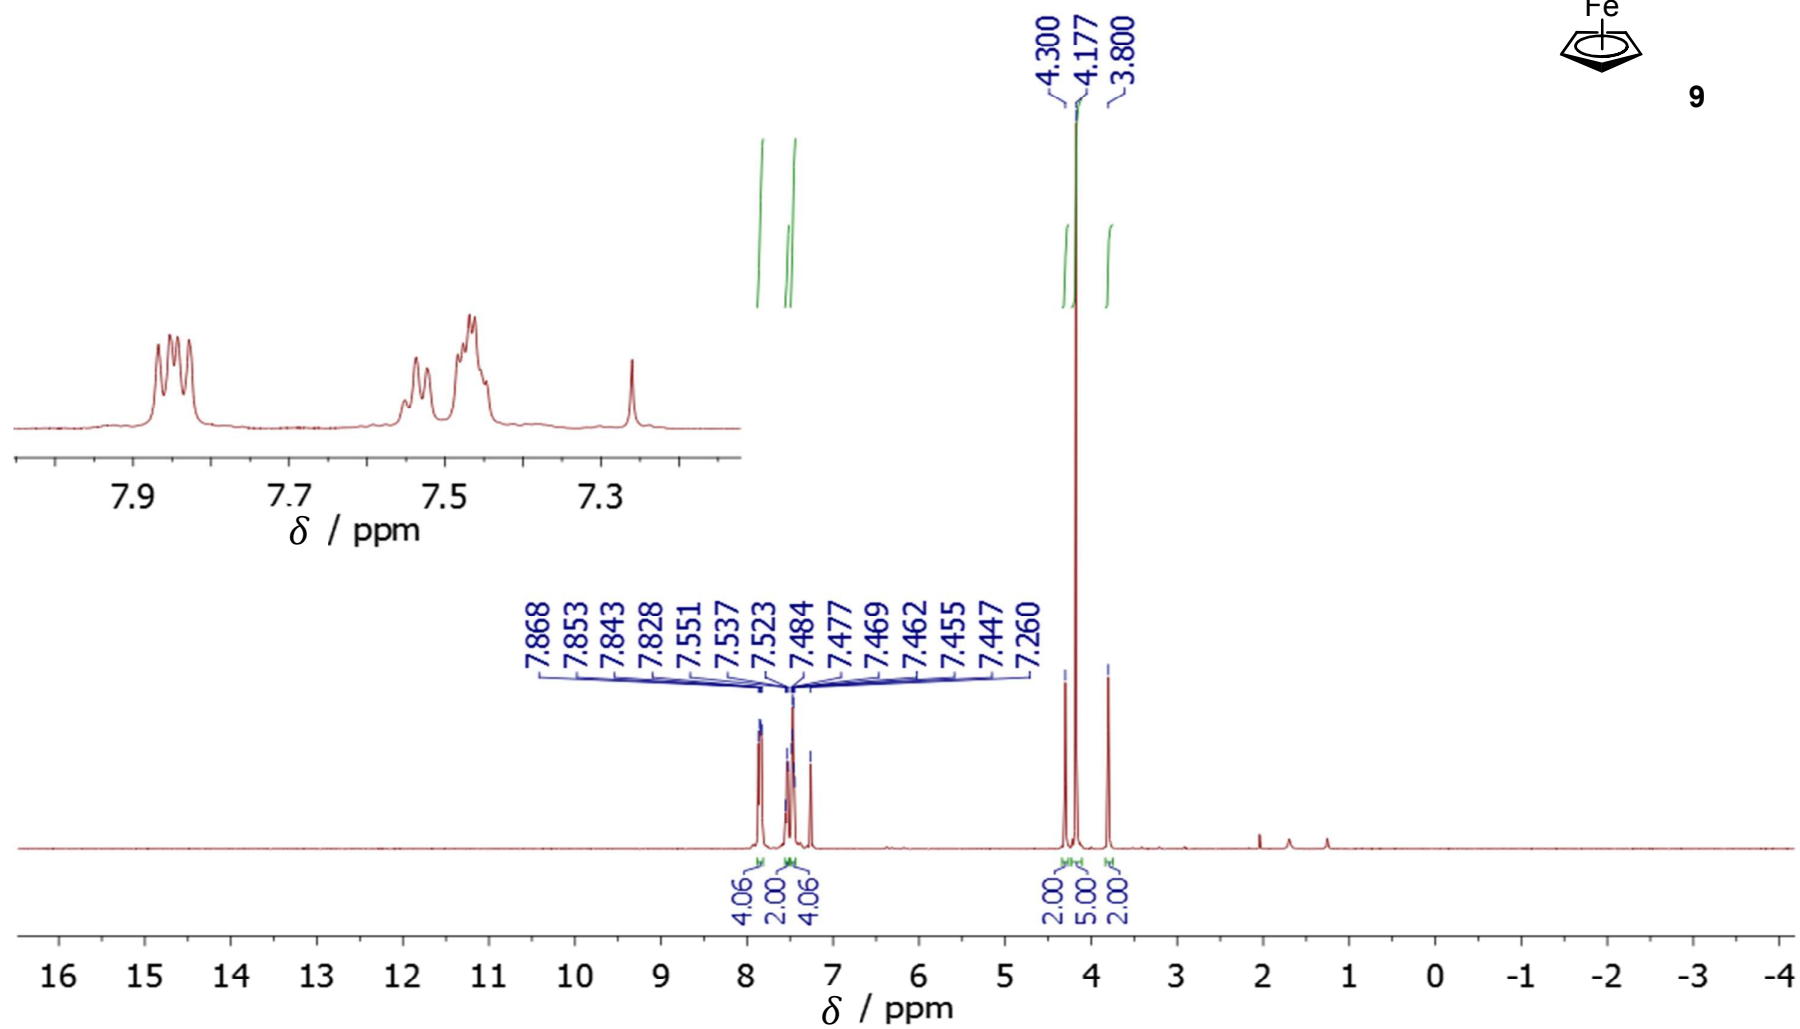

$^{13}\text{C}\{^1\text{H}\}$  NMR,  $\text{CDCl}_3$ , 25 °C

MK-211

C13CPD  $\text{CDCl}_3$  {C:\Bruker\TOPSPIN} korbm 15

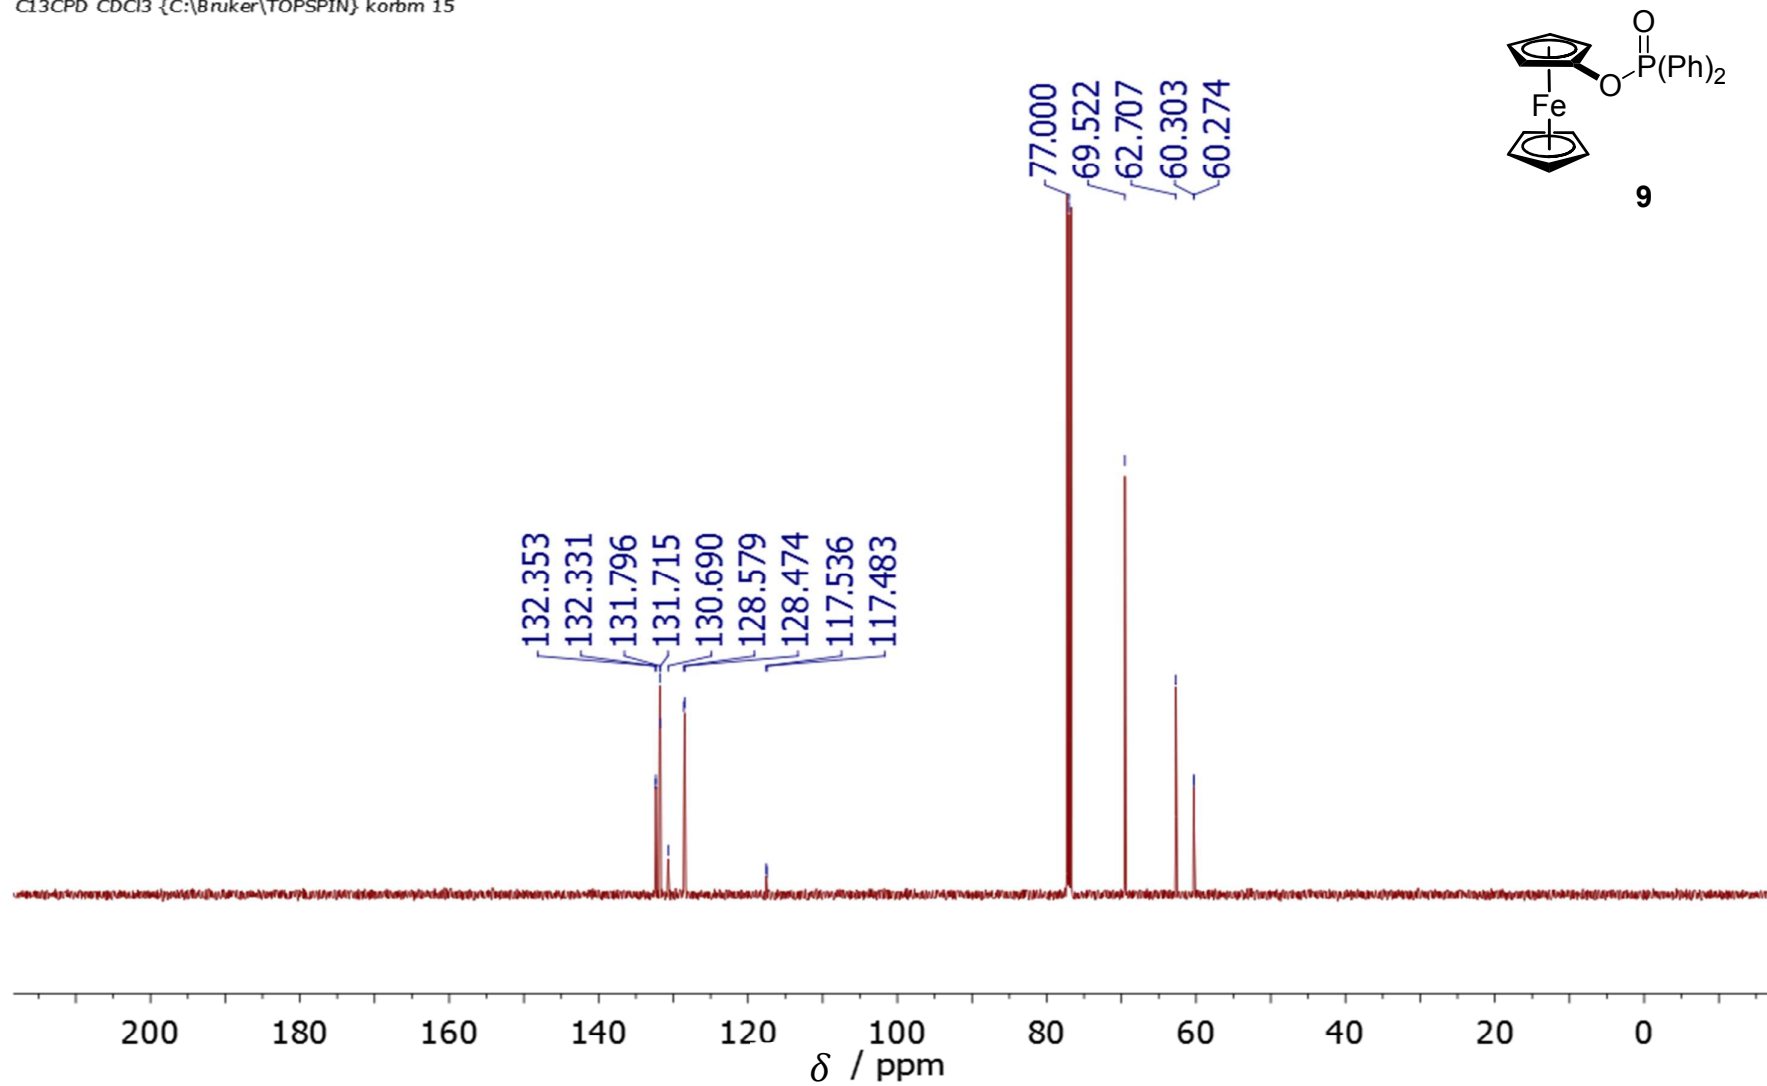

$^1\text{H}$  NMR,  $\text{CDCl}_3$ , 25 °C

MK-214

PROTON  $\text{CDCl}_3$  {C:\Bruker\TOPSPIN} korbm 58

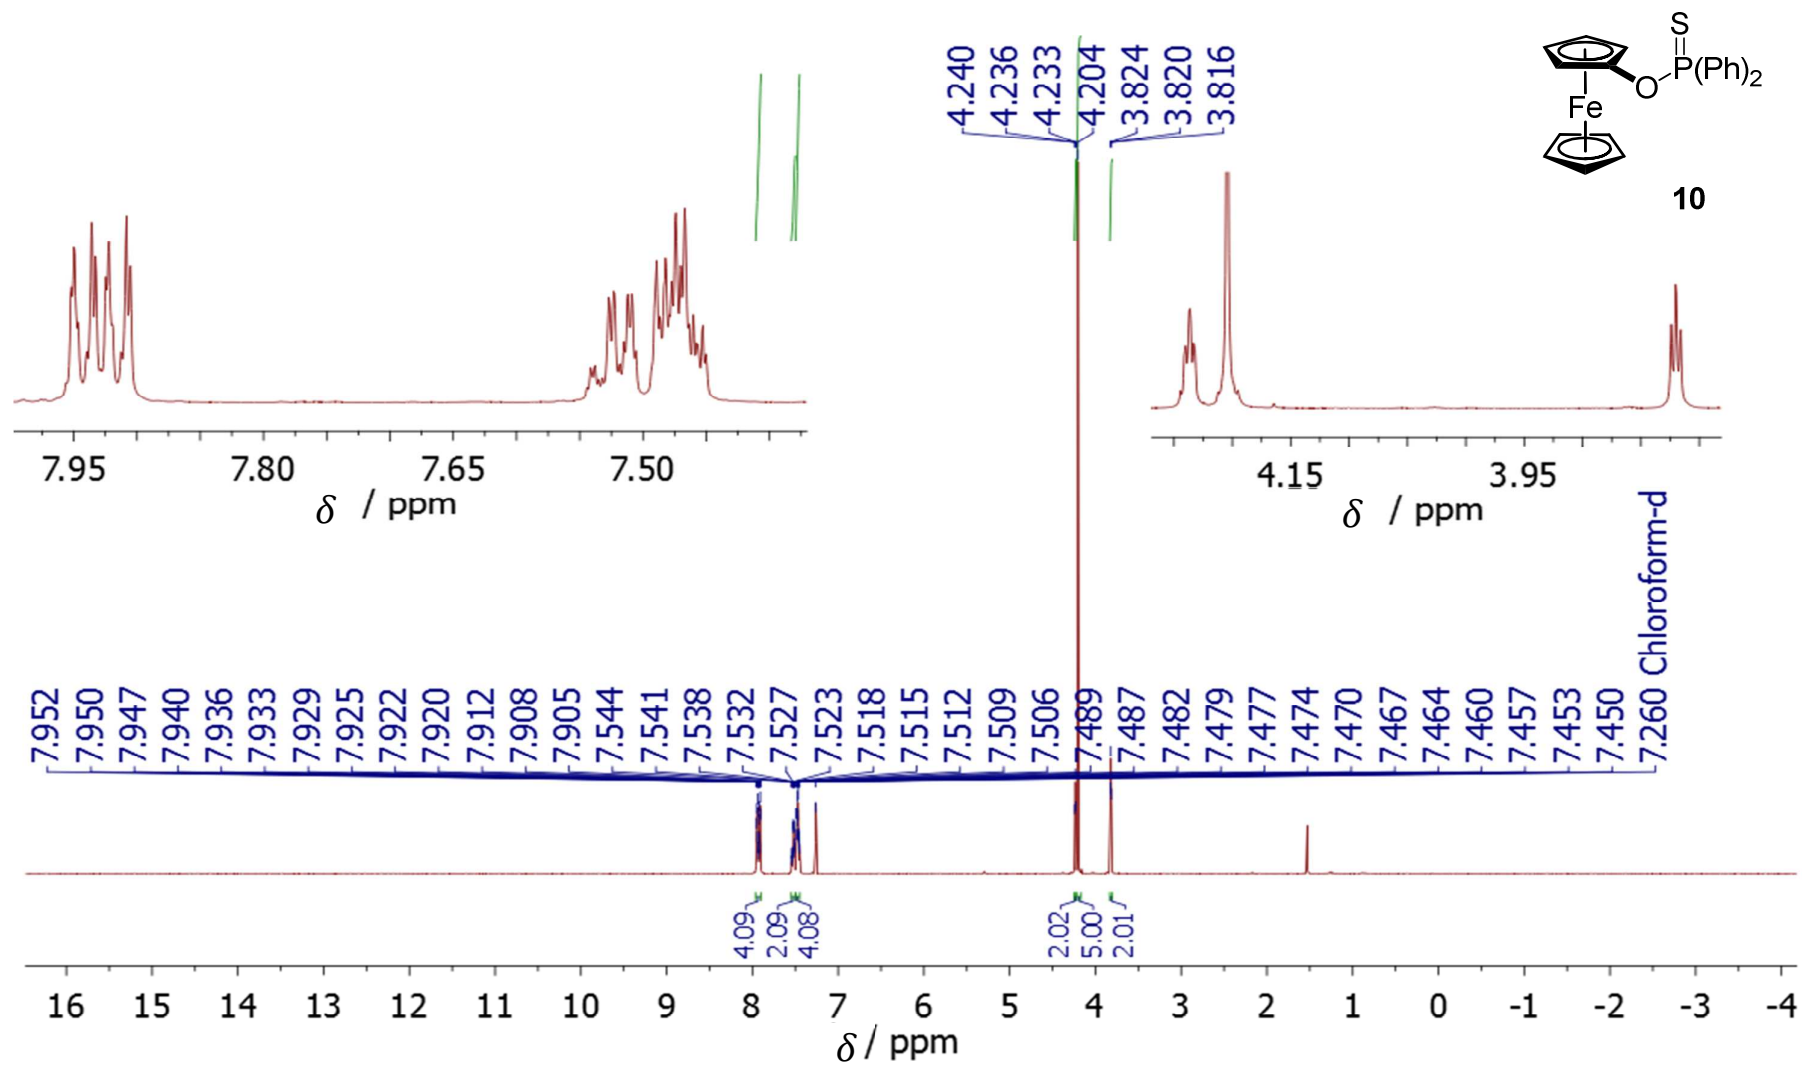

$^{13}\text{C}\{^1\text{H}\}$  NMR,  $\text{CDCl}_3$ , 25 °C  
 MK-214  
 C13CPD  $\text{CDCl}_3$  {C:\Bruker\TOPSPIN} korbm 58

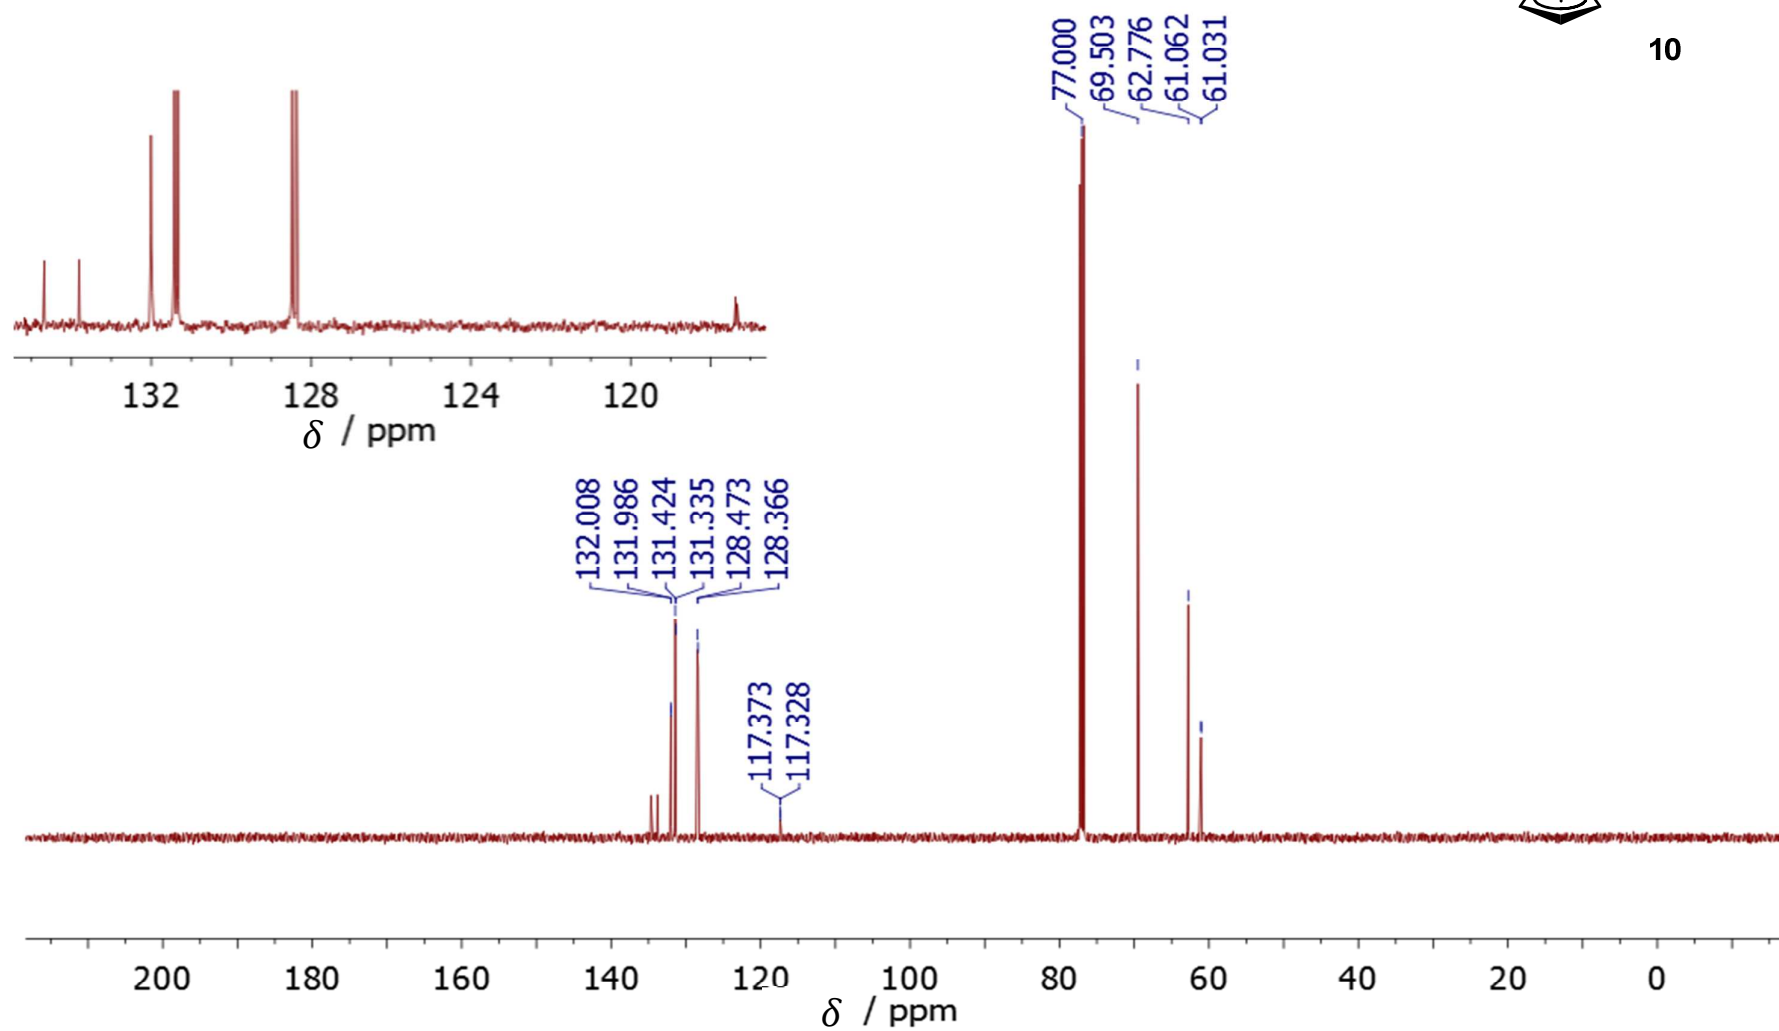

<sup>1</sup>H NMR, C<sub>6</sub>D<sub>6</sub>, 25 °C

MK-207-Benz

PROTON C6D6 {C:\Bukar\1\T05971\1\kordhru60

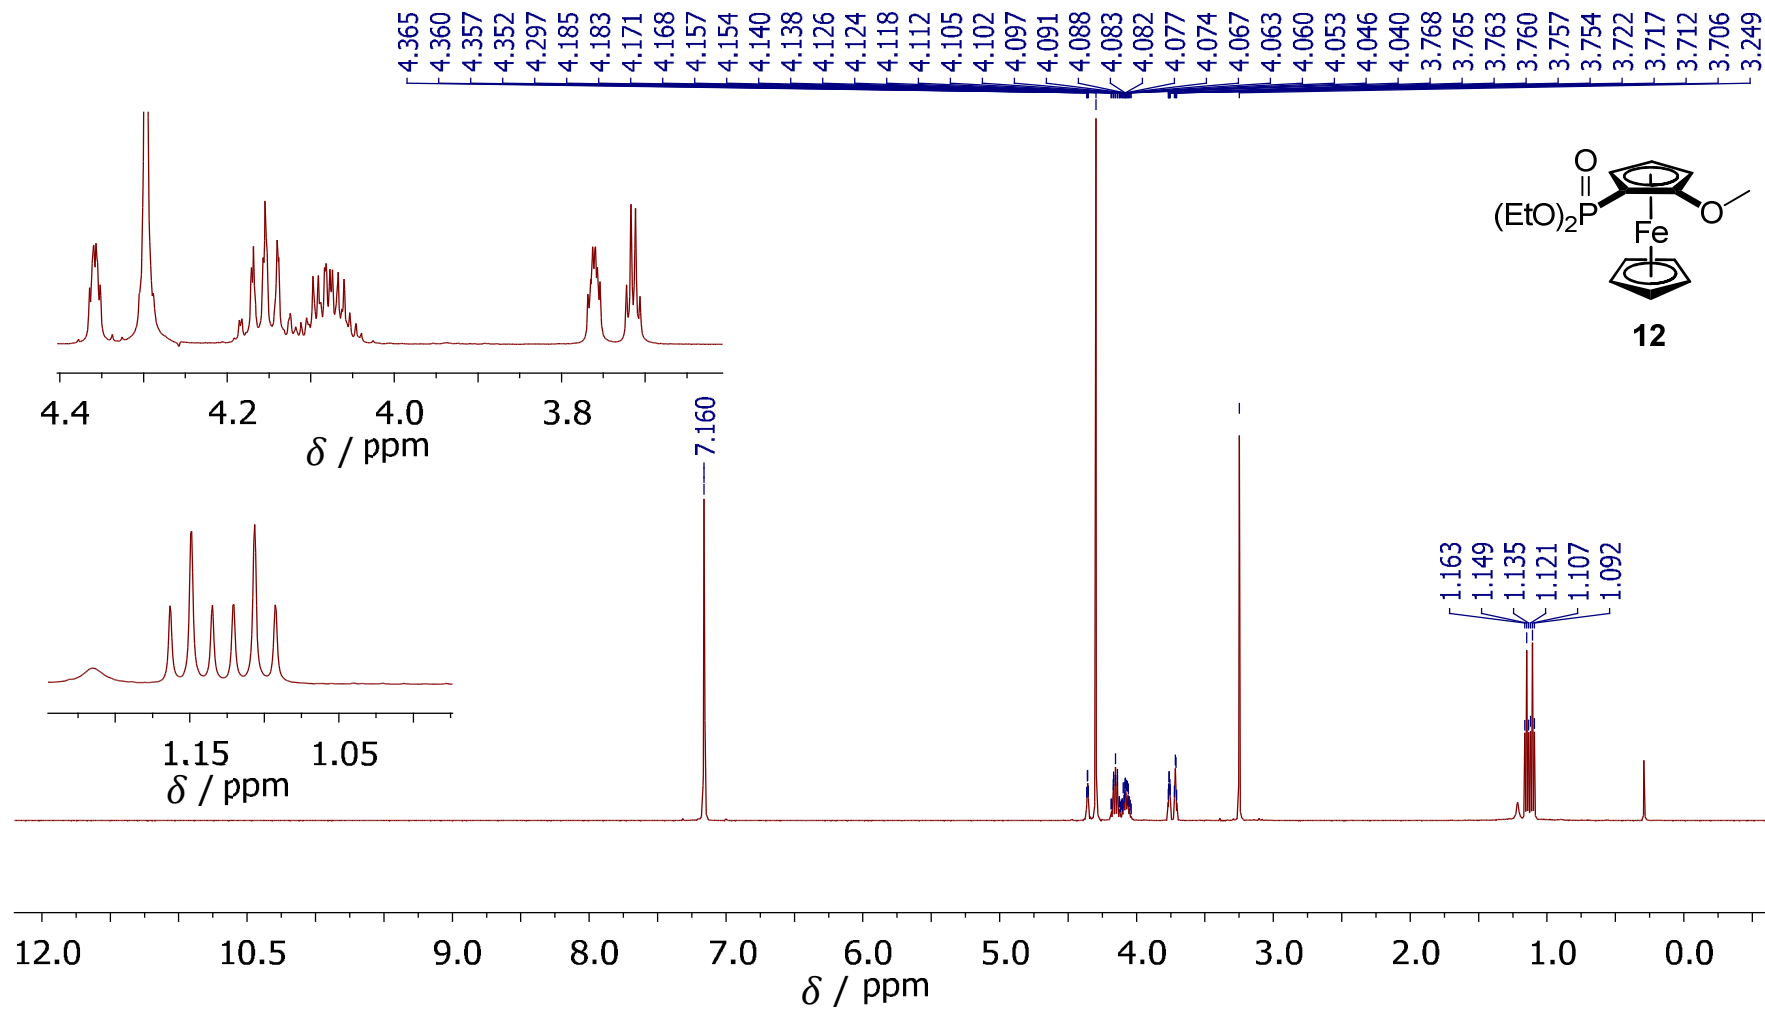

$^{13}\text{C}\{^1\text{H}\}$  NMR,  $\text{C}_6\text{D}_6$ , 25 °C

MK-207-Benz

C:\3CPD-C6D6\13C\Bilder\13CSPIN\Kbrdmm00

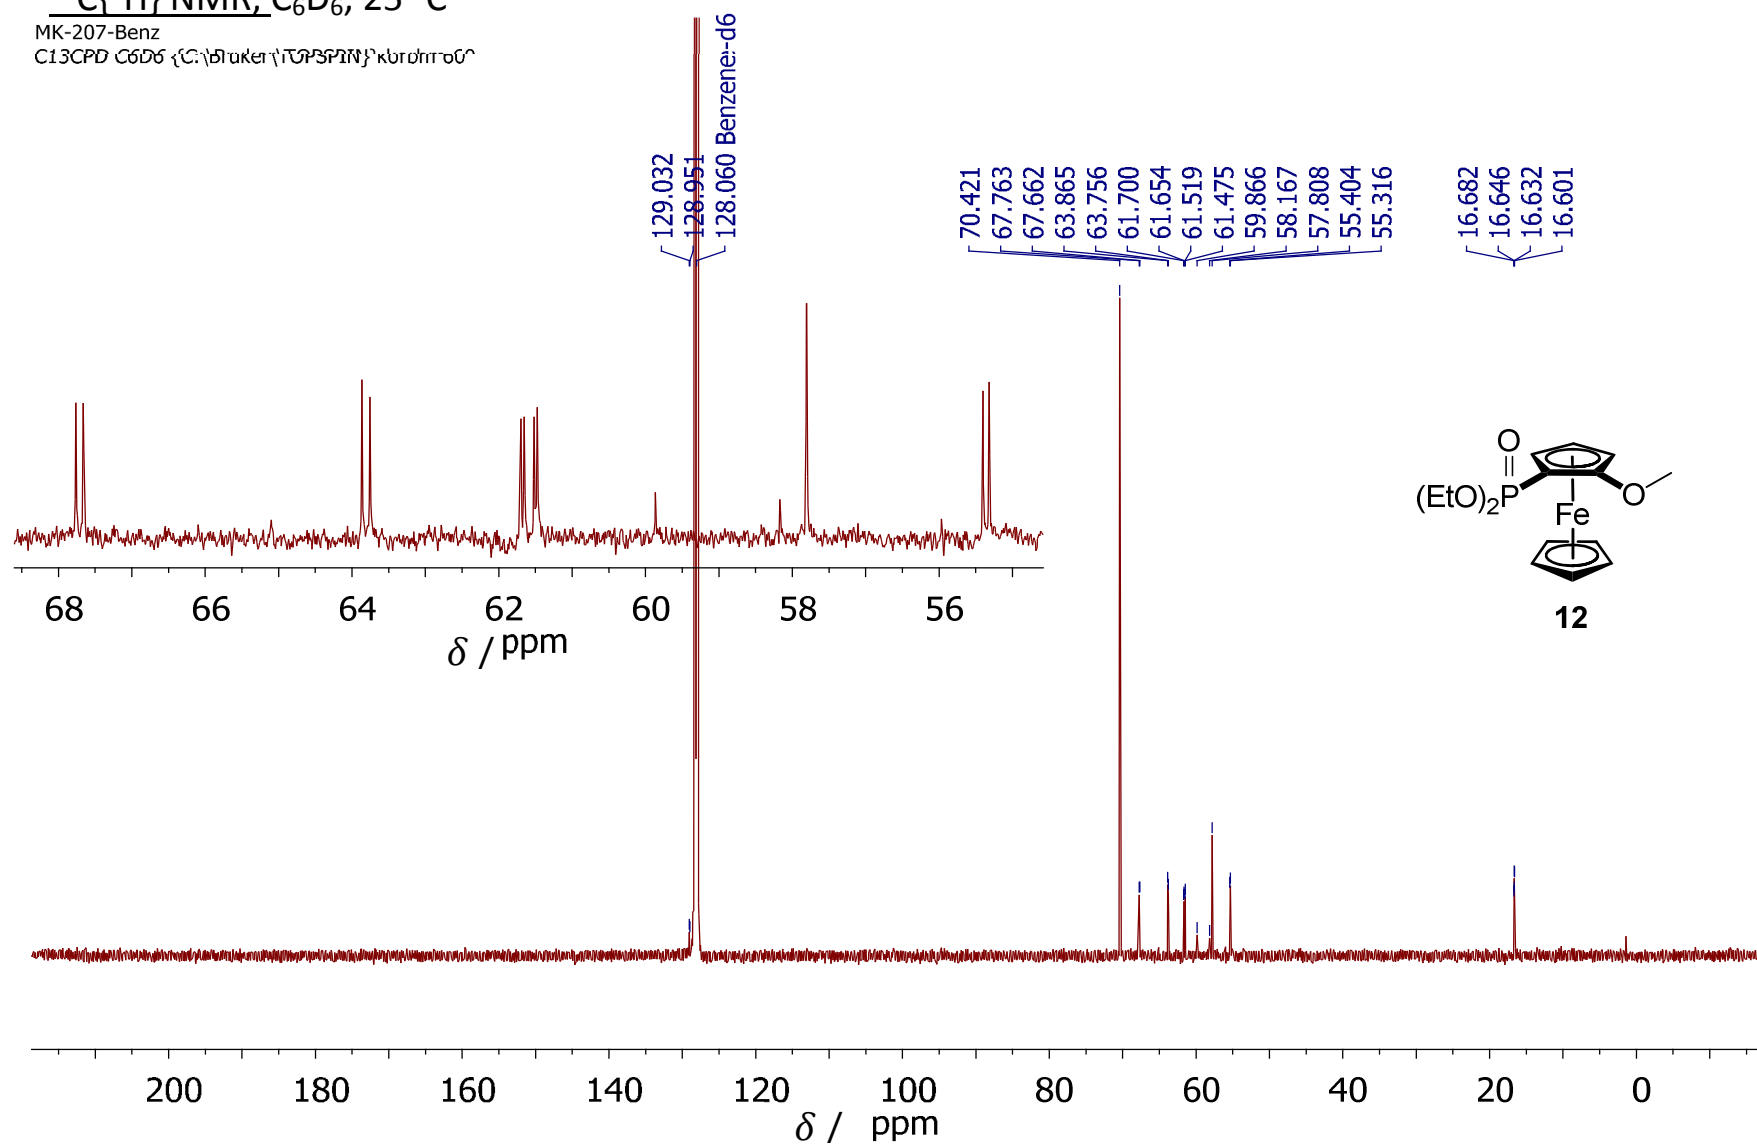

$^{13}\text{C}\{^1\text{H}\}$  NMR,  $\text{CDCl}_3$ , 25 °C

MK-207-F2-komz  
C13CPD  $\text{CDCl}_3$  {C:\Bruker\TOPSPIN} korbm 55

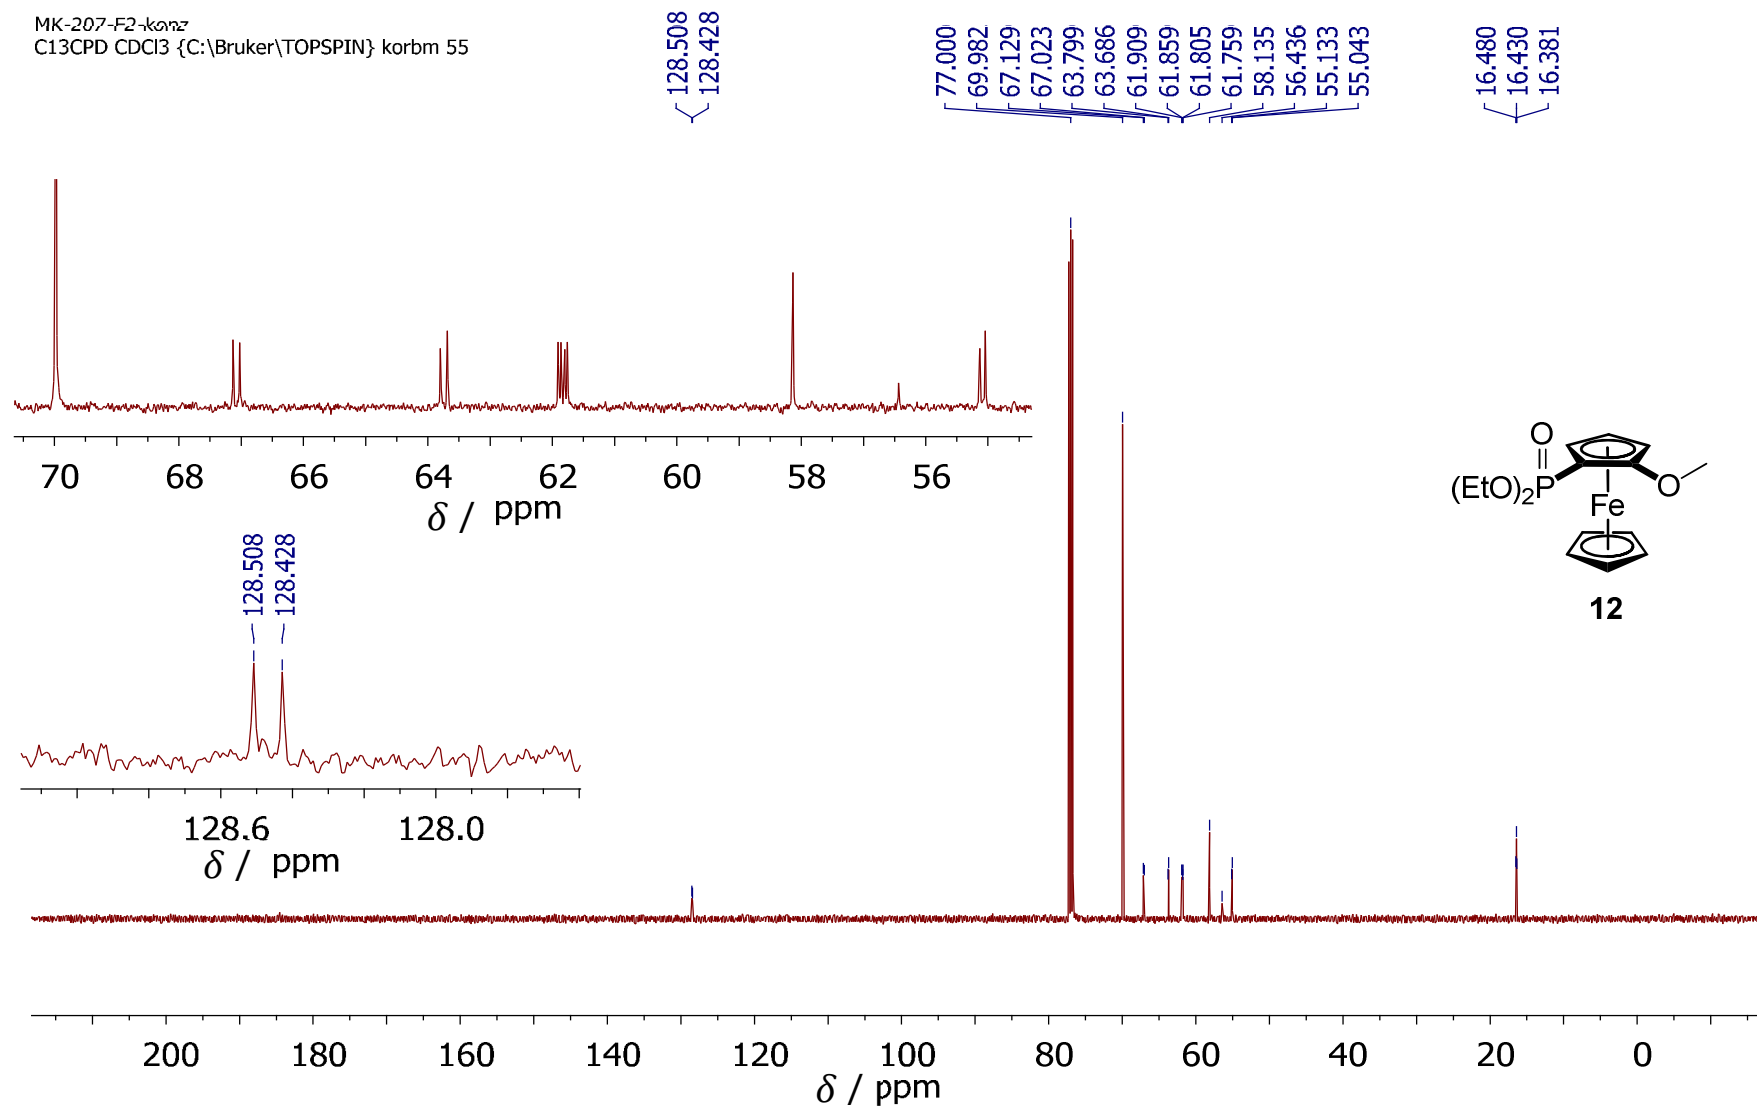

$^1\text{H}$  NMR,  $\text{CDCl}_3$ , 25 °C

MK-217-F2

PROTON  $\text{CDCl}_3$  {C:\Bruker\TOPSPIN} korbm 31

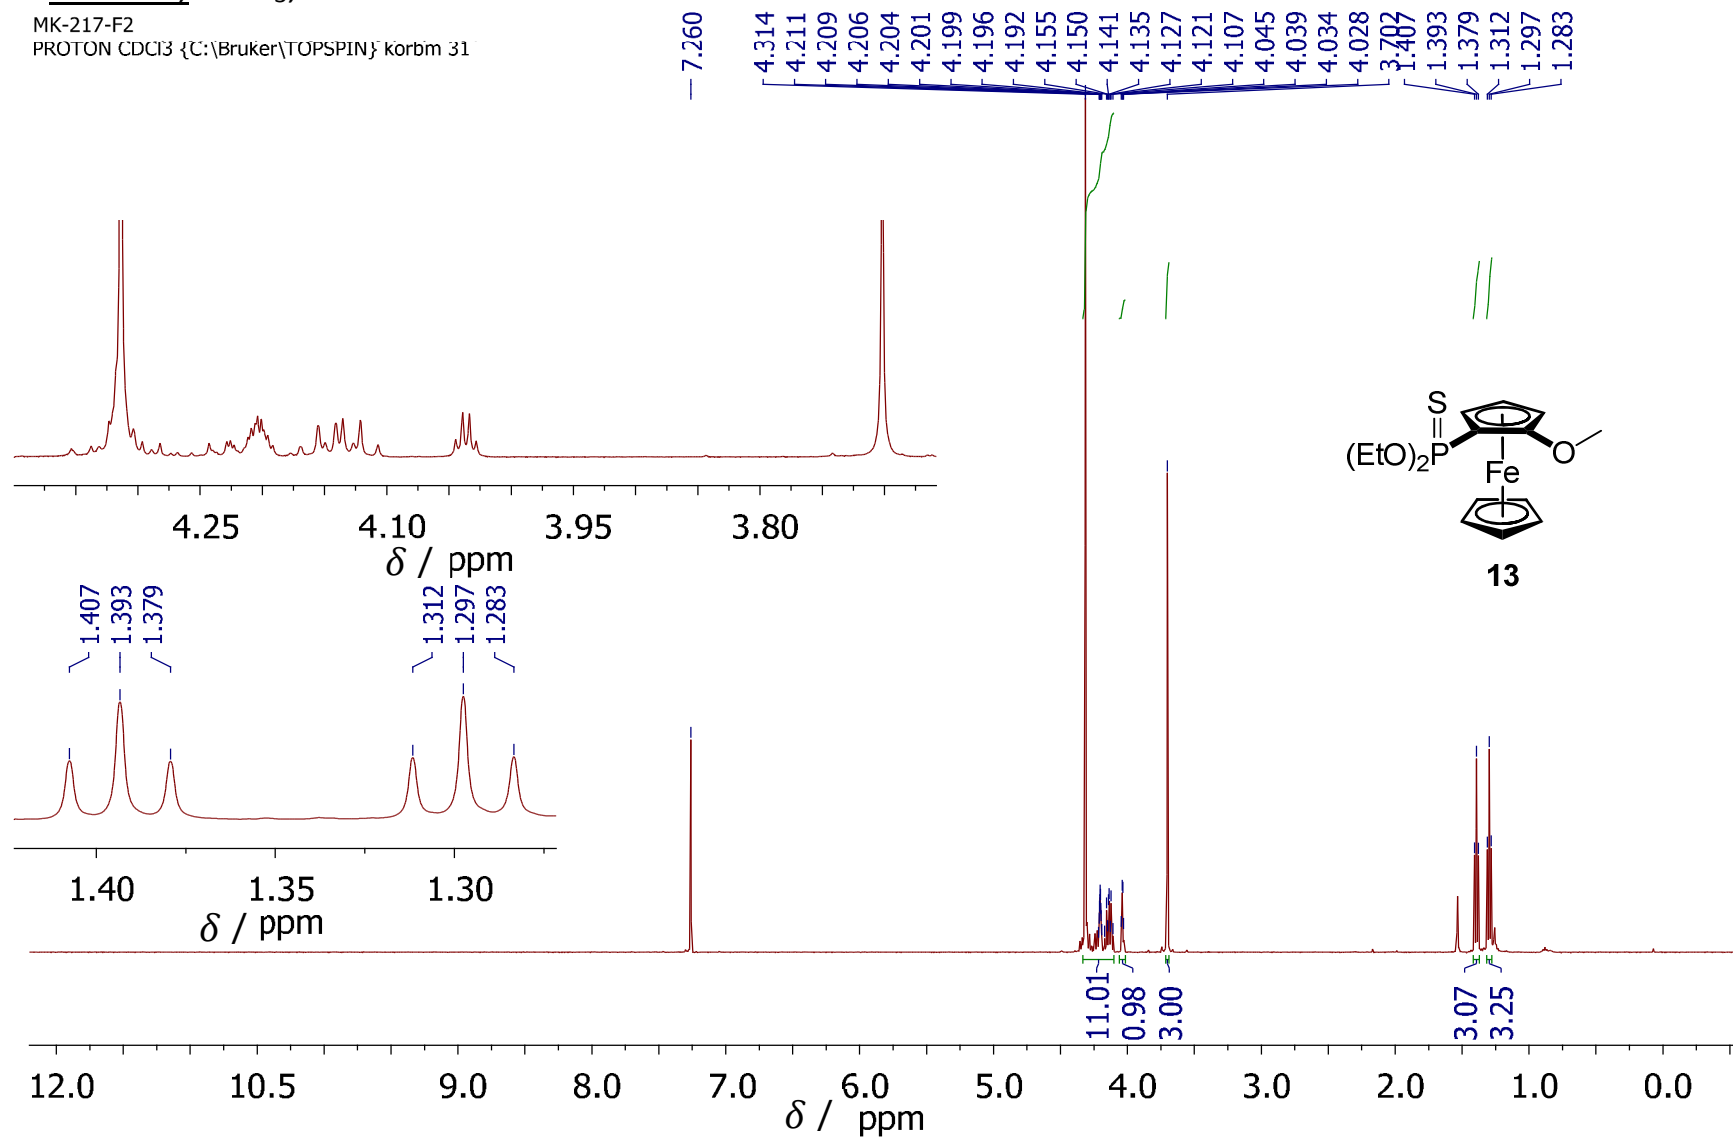

MK-217-F2-dicker  
C13CPD CDCl<sub>3</sub> {C:\bruker\100SPIN} köpdm 11'

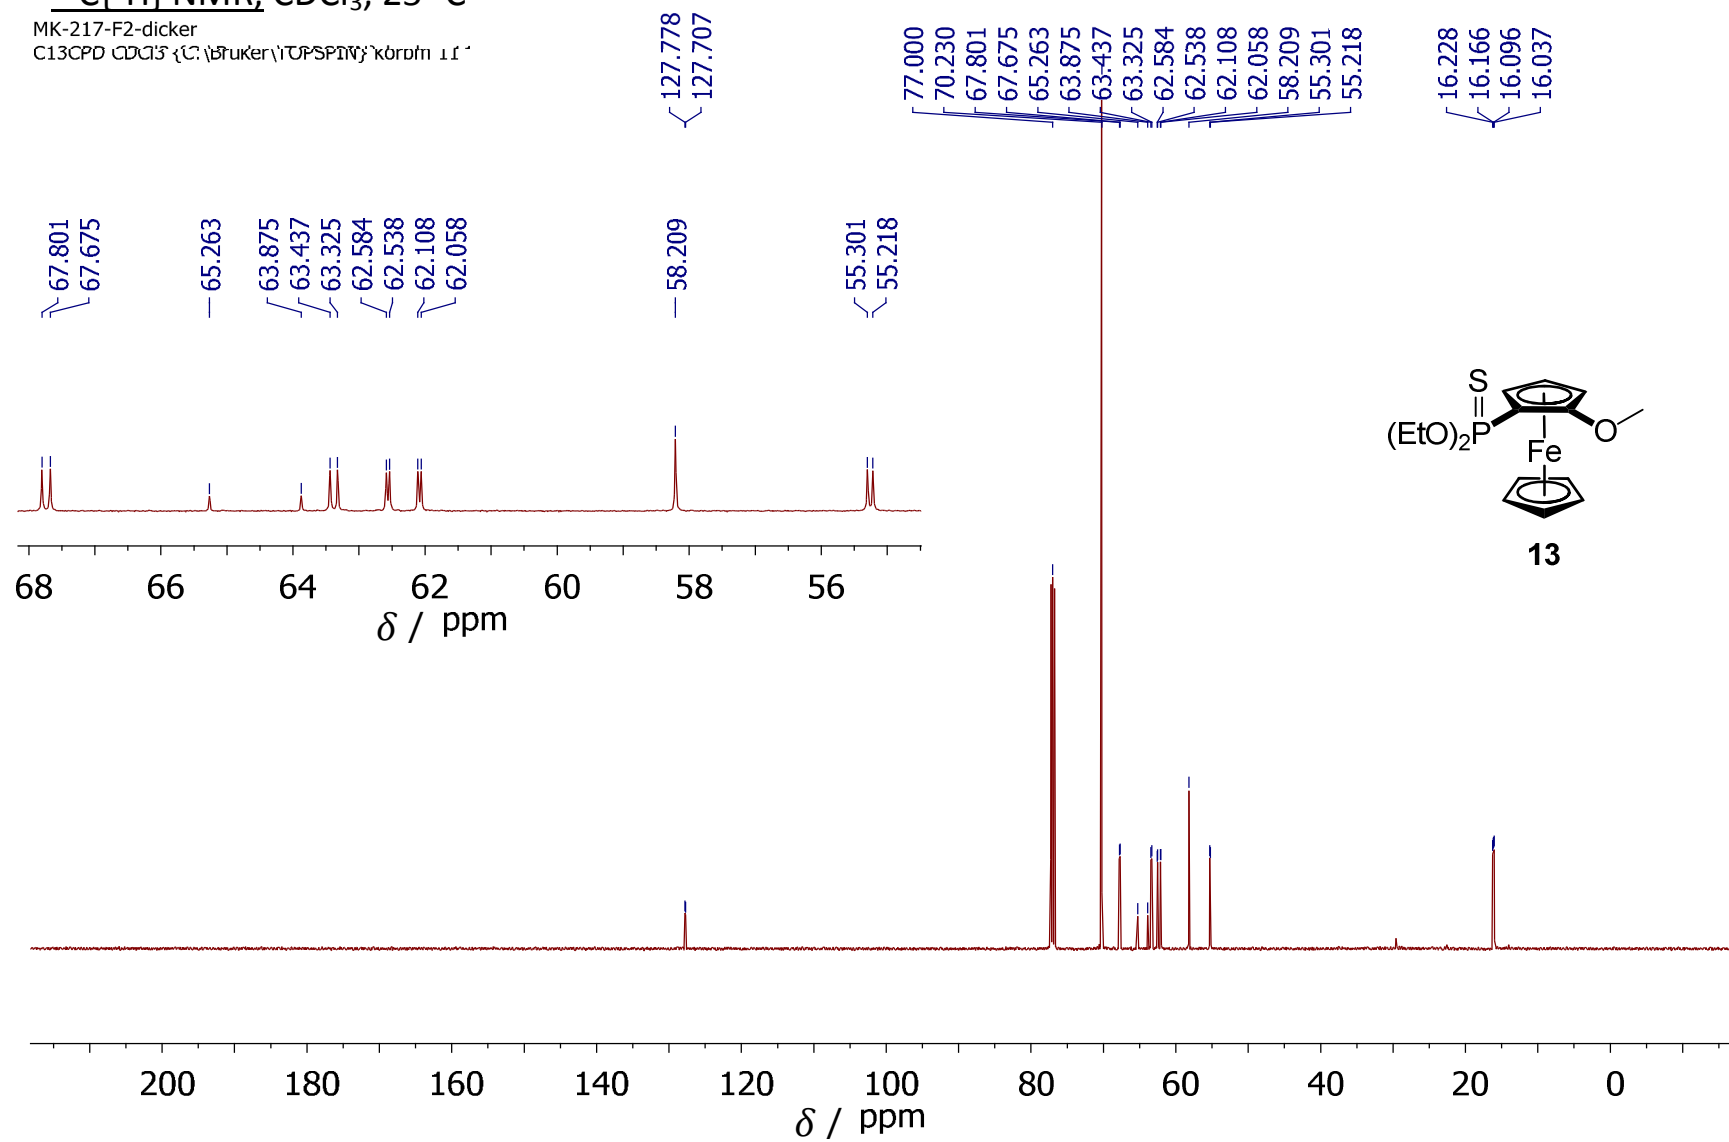

$^1\text{H}$  NMR,  $\text{CDCl}_3$ , 25 °C

MK-316-F2-neu

PROTON  $\text{CDCl}_3$  {C:\Bruker\TOPSPIN} korbm 41

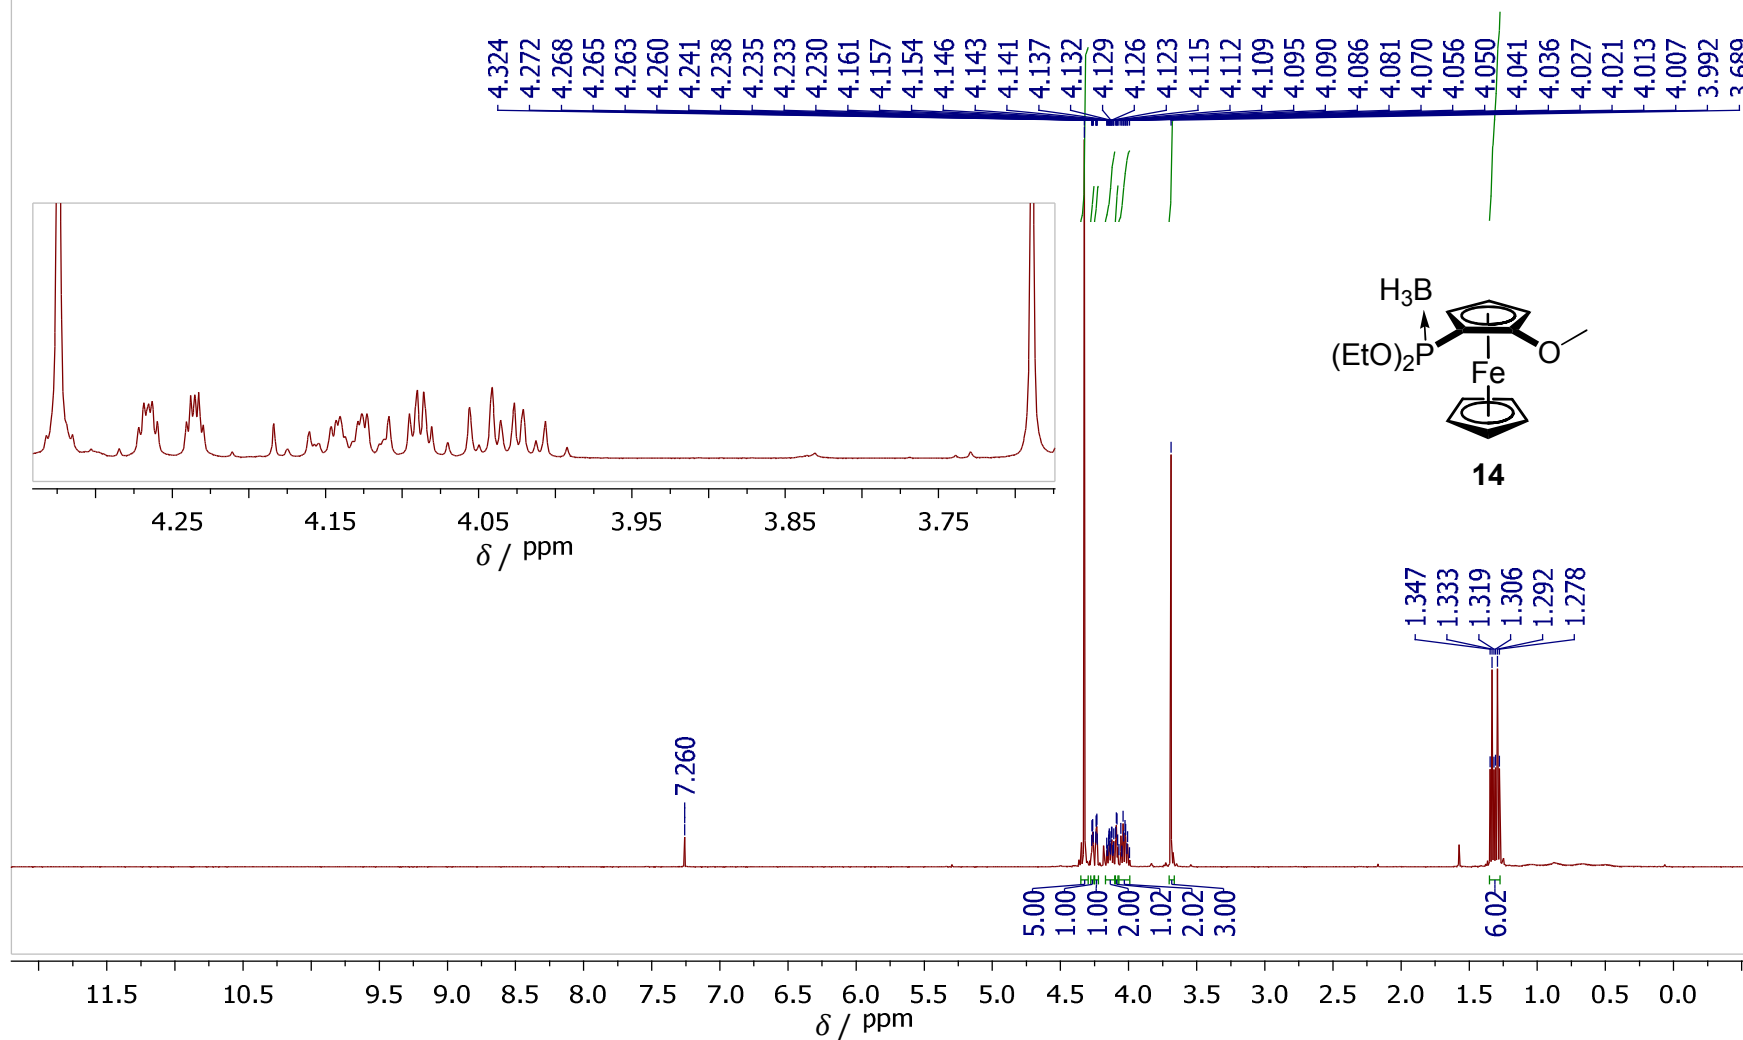

$^{13}\text{C}\{^1\text{H}\}$  NMR,  $\text{CDCl}_3$ , 25 °C

MK-316-F2-neu

C13CPD  $\text{CDCl}_3$  {C:\Bruker\TOPSPIN} korbm 41

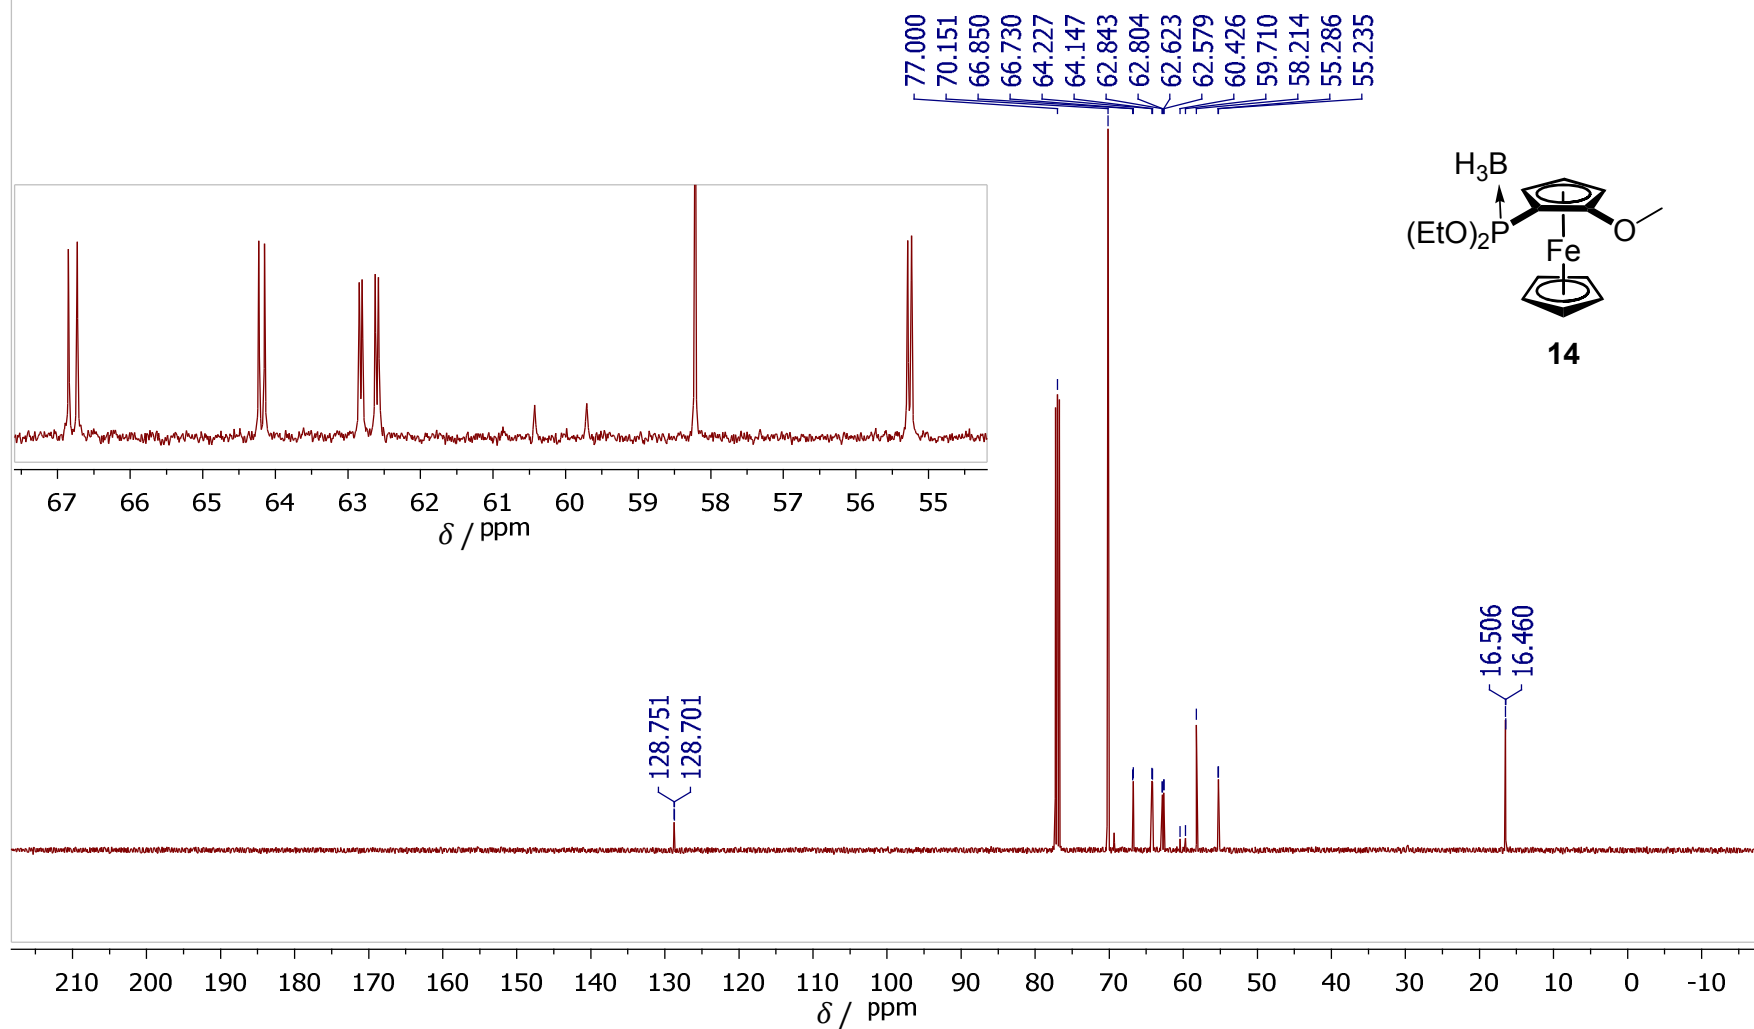

$^1\text{H}$  NMR,  $\text{CDCl}_3$ , 25 °C

MK-219-F2-F3  
PROTON  $\text{CDCl}_3$  {C:\Bruker\TOPSPIN} korbm 11

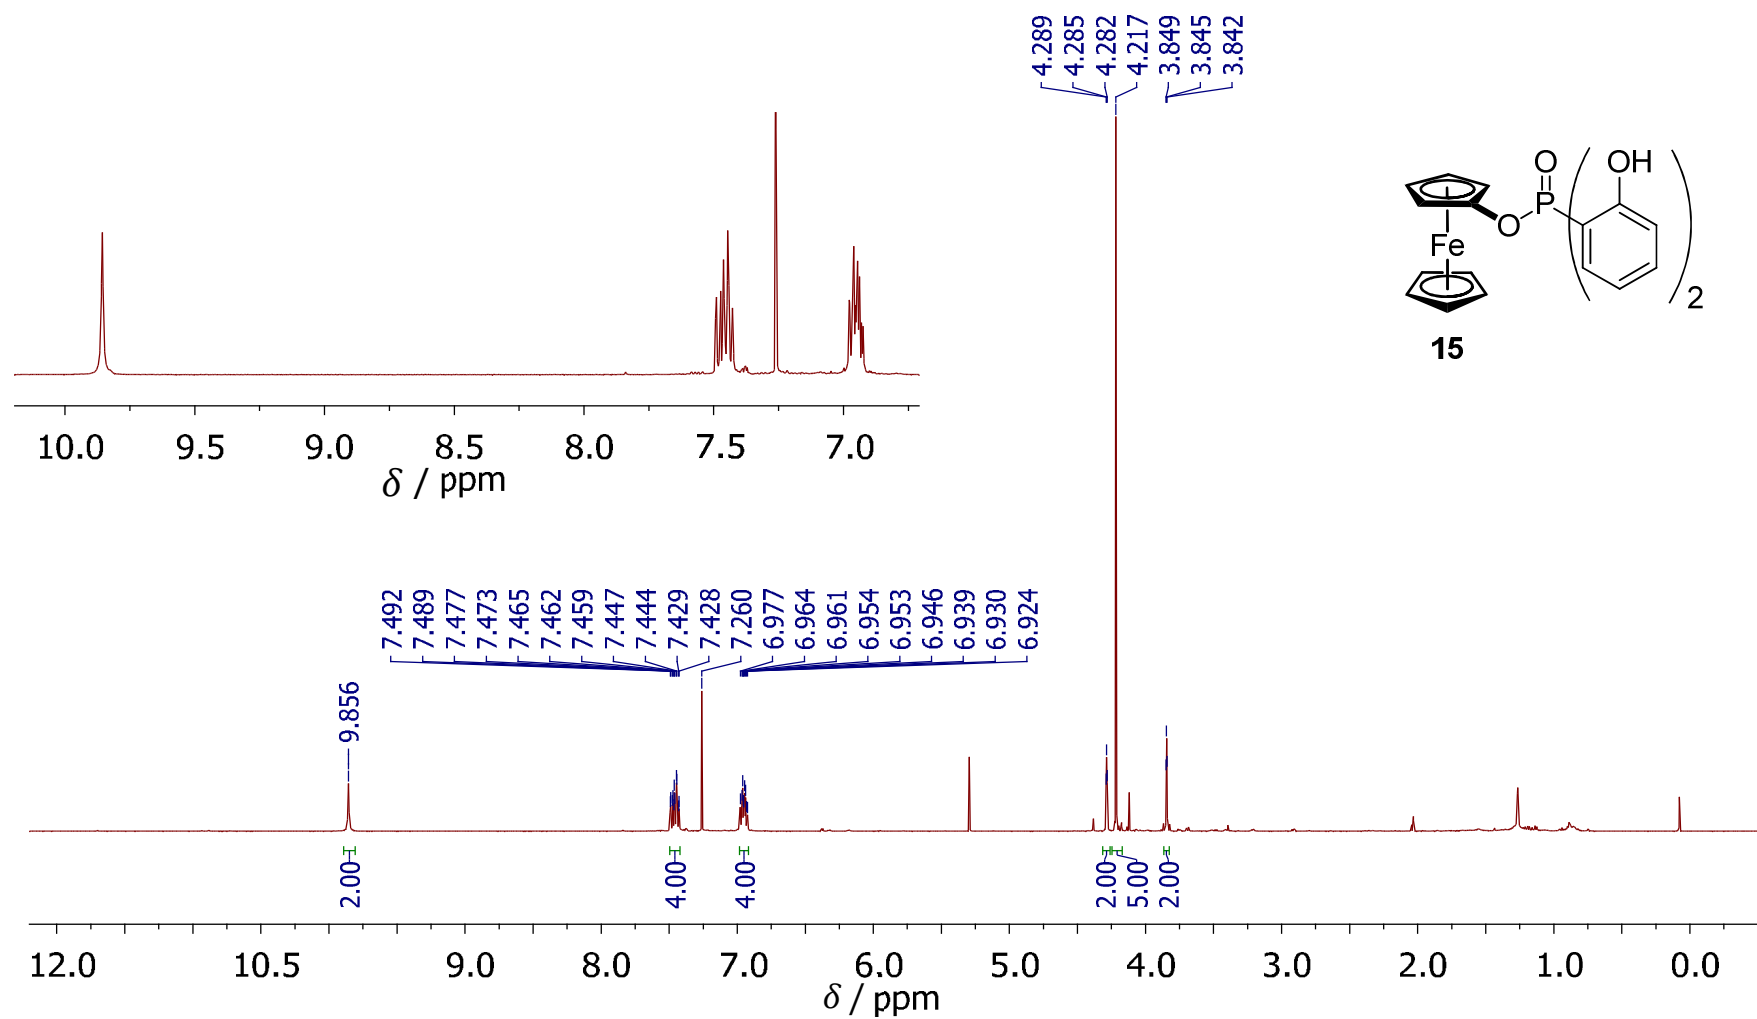

$^{13}\text{C}\{^1\text{H}\}$  NMR,  $\text{CDCl}_3$ , 25 °C

MK-219-F2-F3

C13CPD  $\text{CDCl}_3$  {C:\Bruker\TOPSPIN} korbm 11

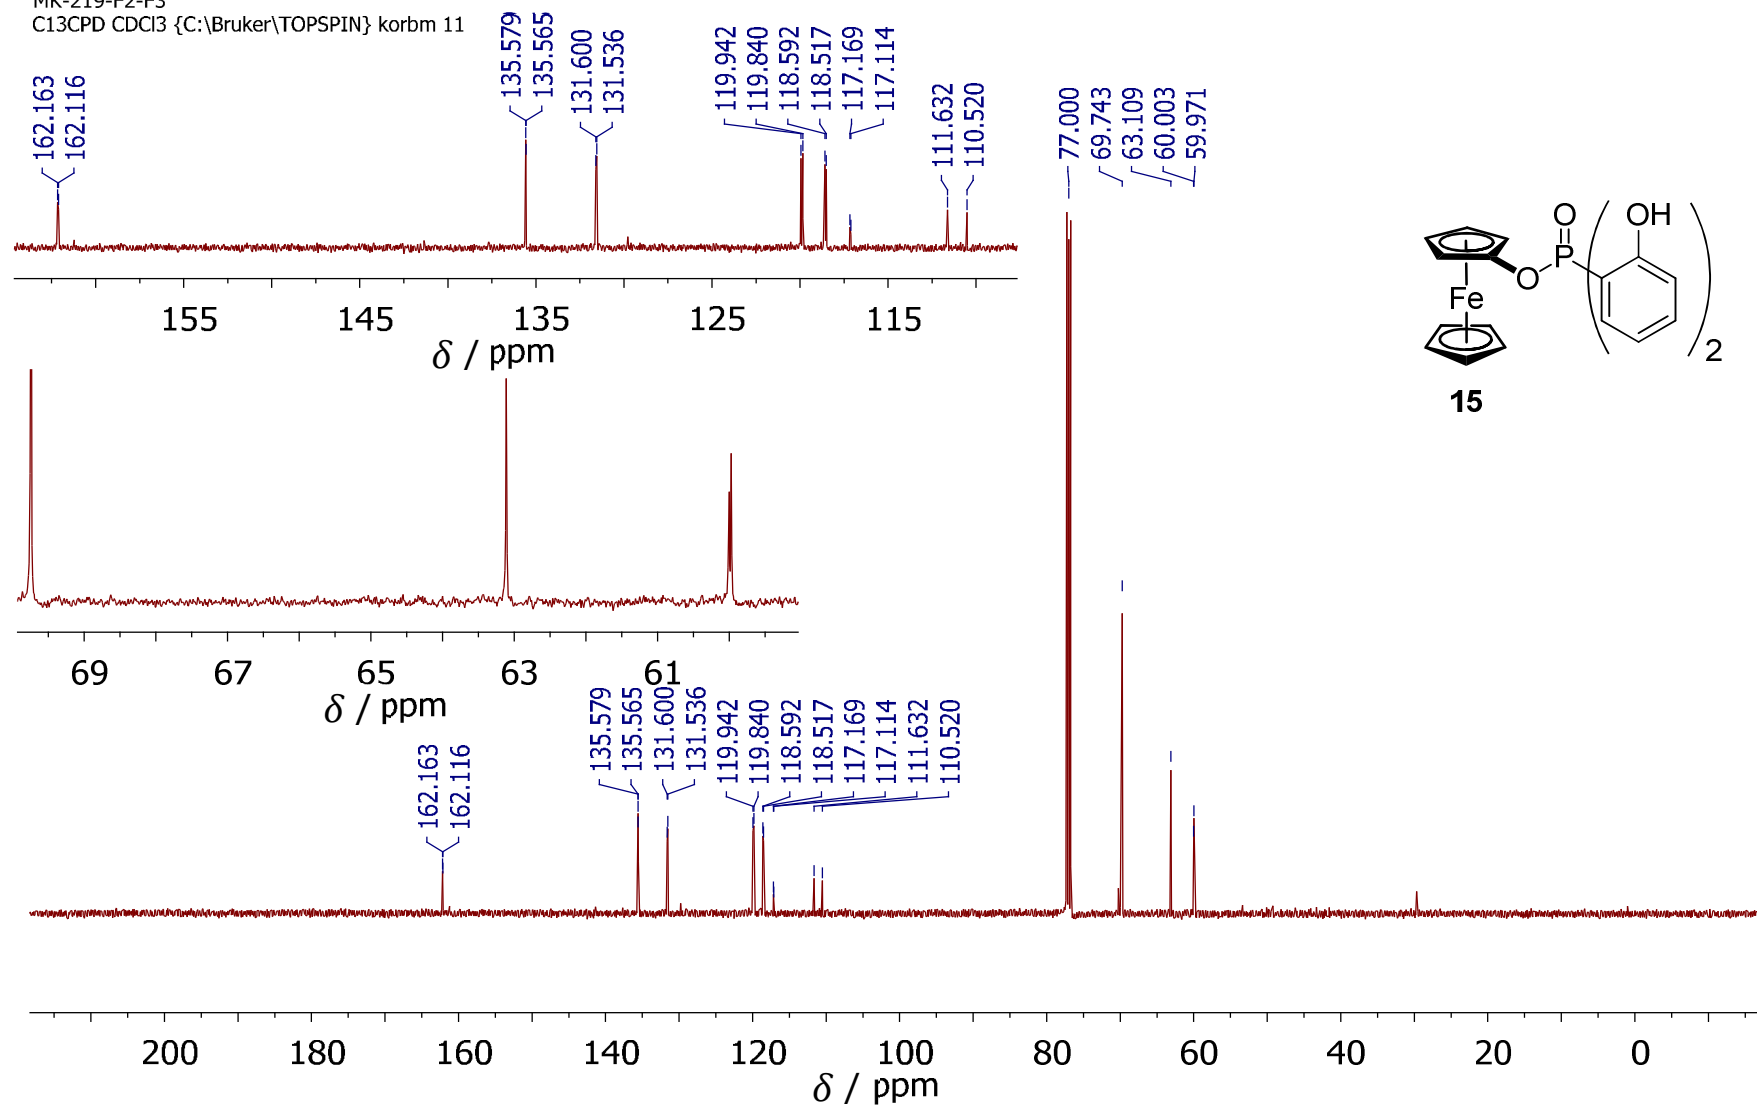

MK-220-neu-F3  
PROTON CDCl<sub>3</sub> {C:\Bruker\TOPSPIN} korbm 26

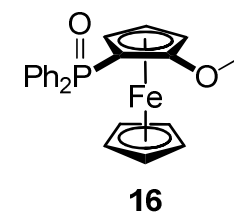

$^{13}\text{C}\{^1\text{H}\}$  NMR,  $\text{CDCl}_3$ , 25 °C

MK-220-neu-F3

C13CPD CDCl3 {C:\Bruker\TOPSPIN}\k0rbm 26 -

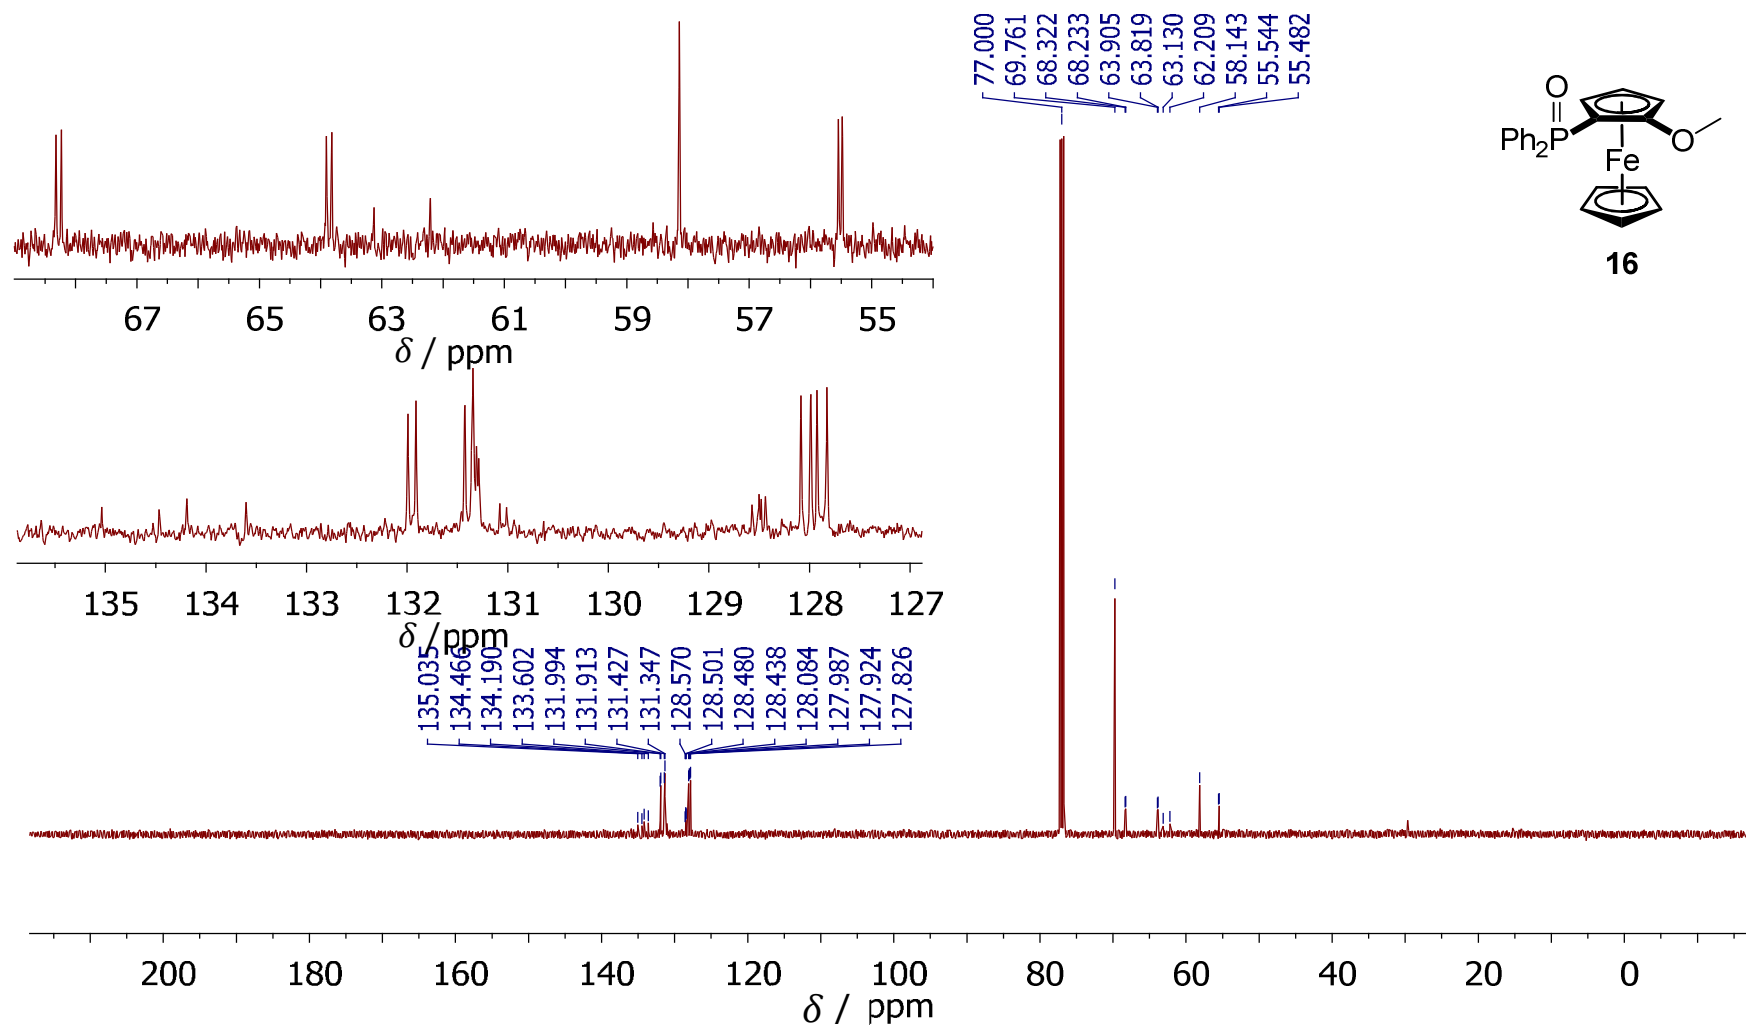

<sup>1</sup>H NMR, CDCl<sub>3</sub>, 25 °C

MK-226-F2-umkrist  
PROTON CDCl<sub>3</sub> {C:\Bruker\TOPSPIN} korbm 33

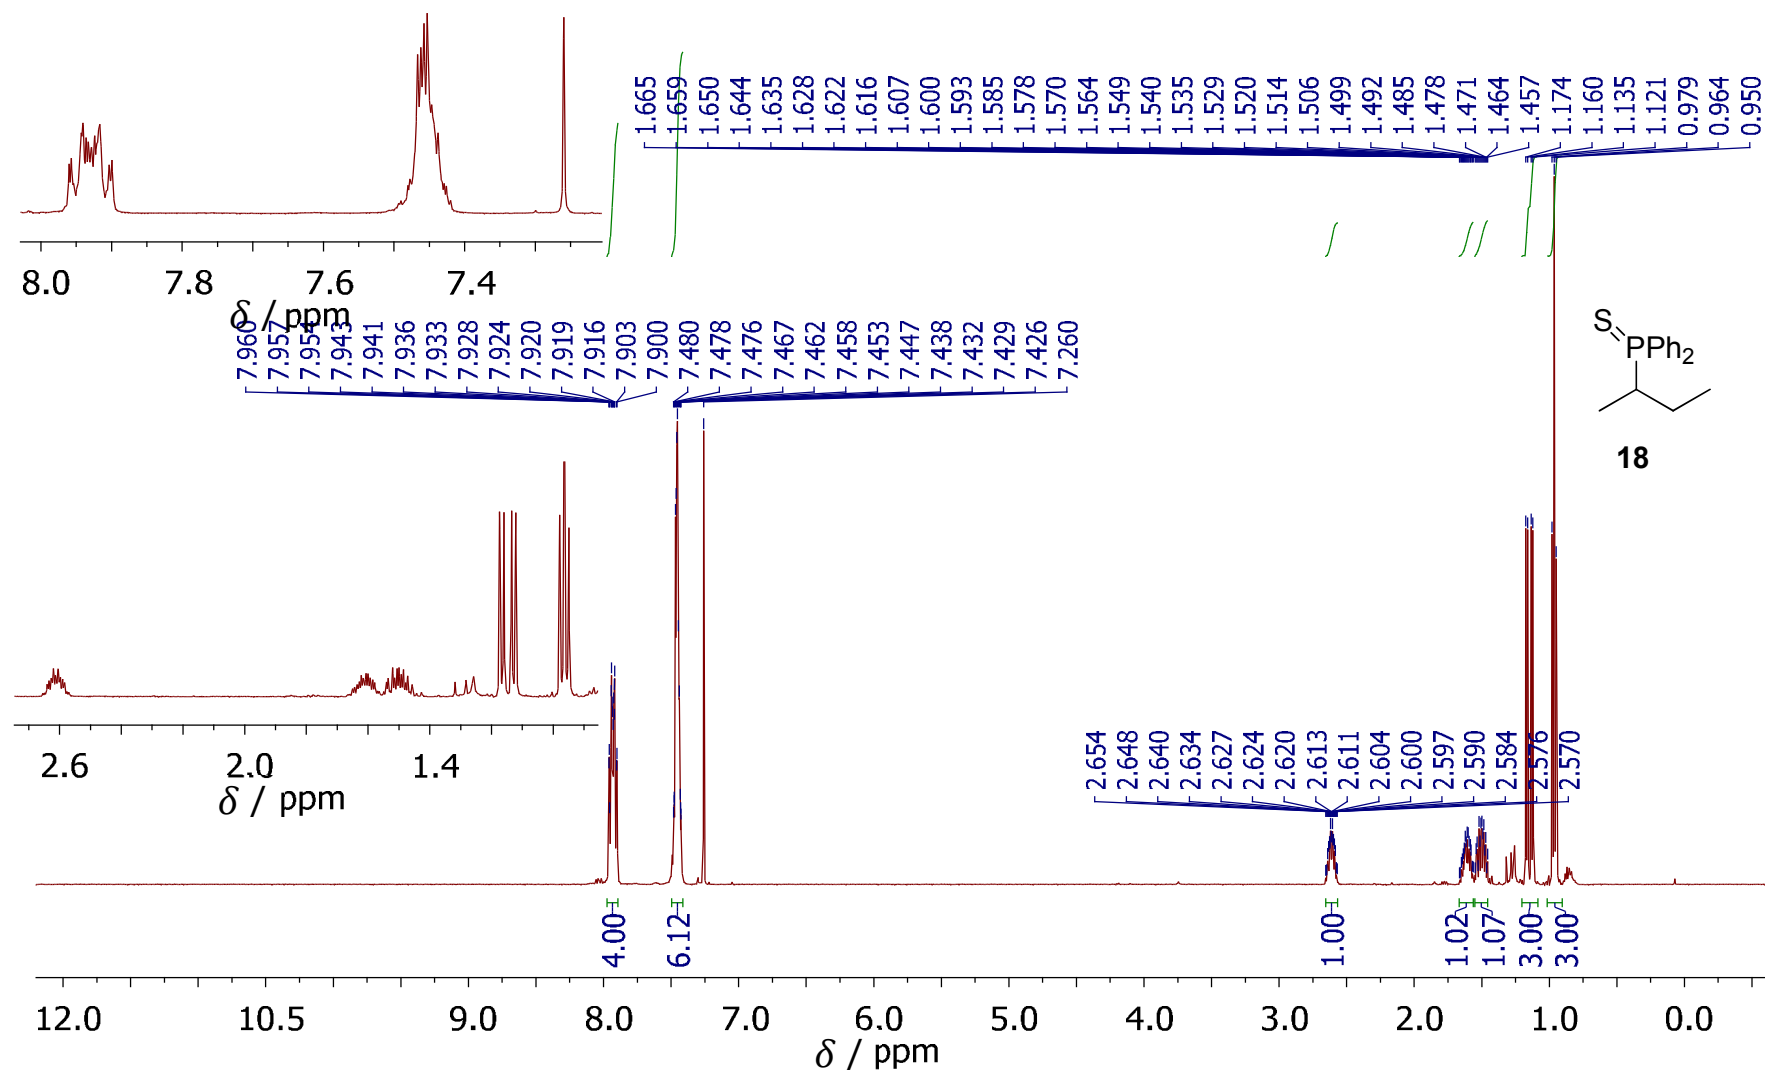

$^{13}\text{C}\{^1\text{H}\}$  NMR,  $\text{CDCl}_3$ , 25 °C

MK-226-F2-umkrist

C13CPD  $\text{CDCl}_3$  {C:\Bruker\TOPSPIN} korbm 33

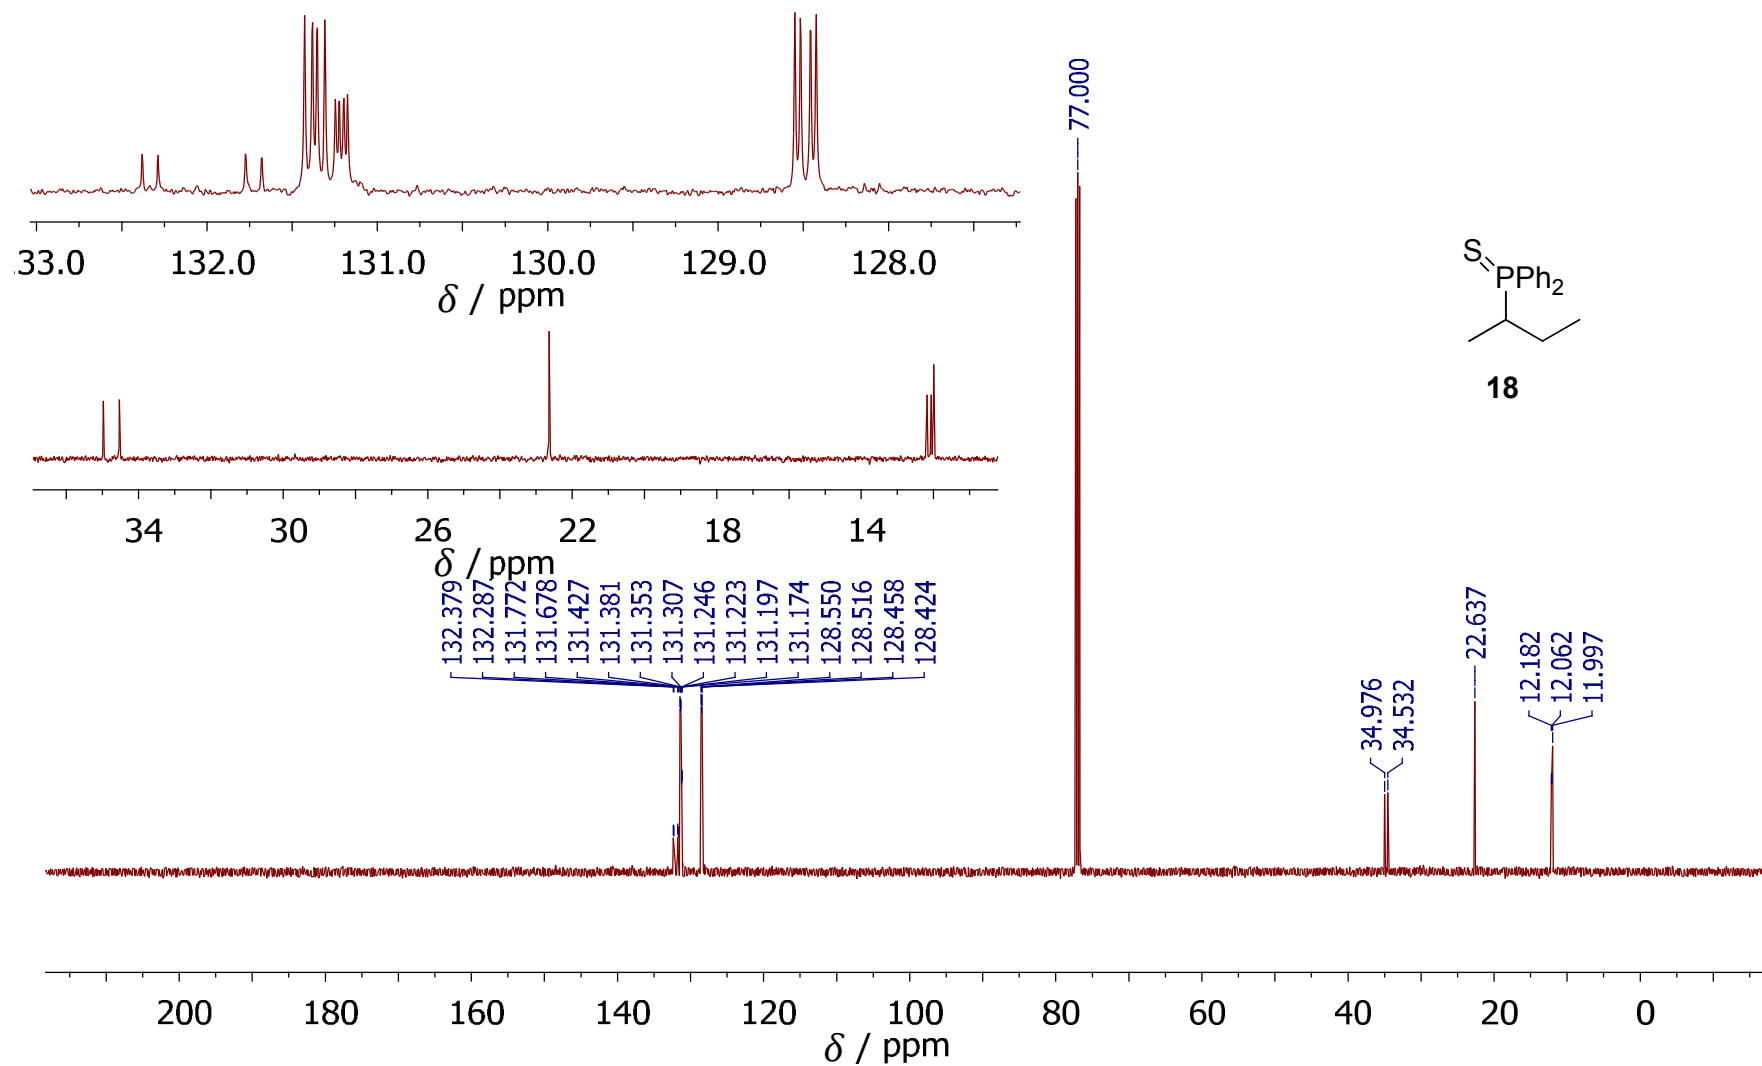

$^{13}\text{C}\{^1\text{H}\}$  NMR,  $\text{CDCl}_3$ , 25 °C

MK-212-2-F2-dick

C13CPD  $\text{CDCl}_3$  {C:\Bruker\TOPSPIN} korbm 53

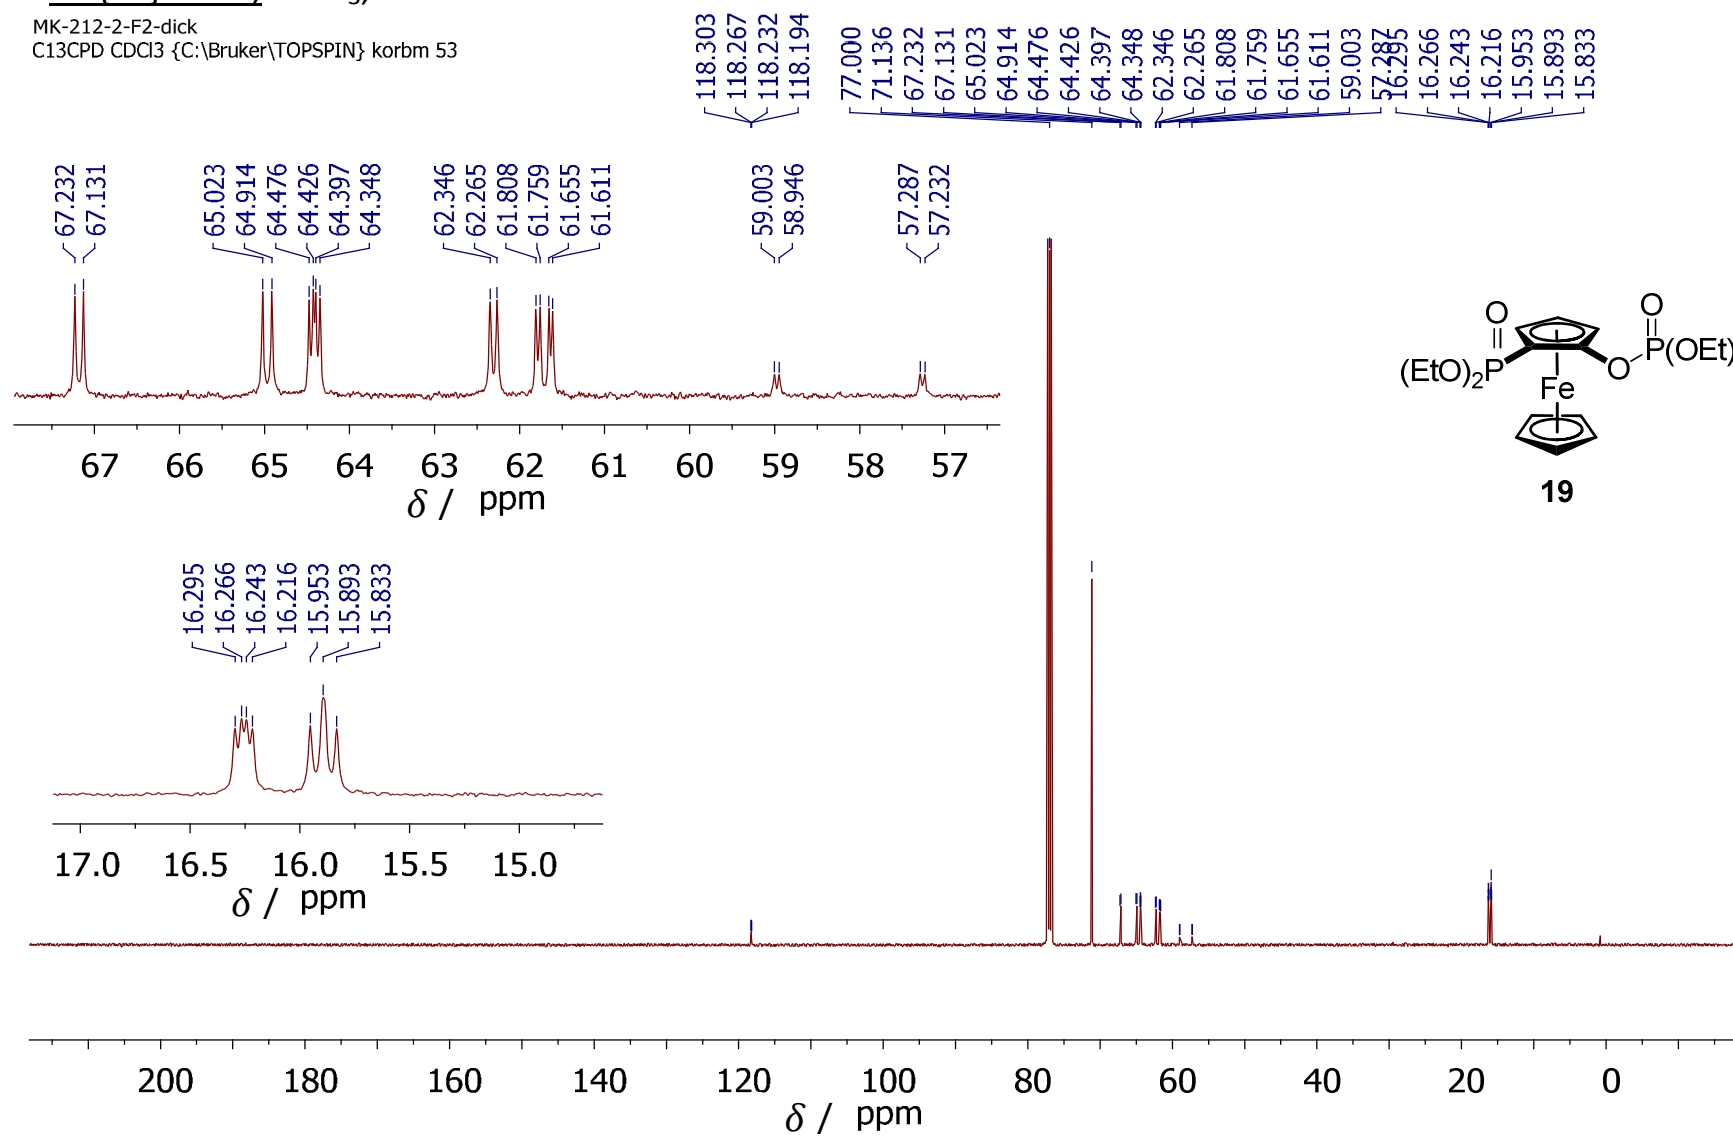

<sup>1</sup>H NMR, CDCl<sub>3</sub>, 25 °C

MK-212-2-F2  
PROTON CDCl<sub>3</sub> {C:\Bruker\TOPSPIN} korbm 38

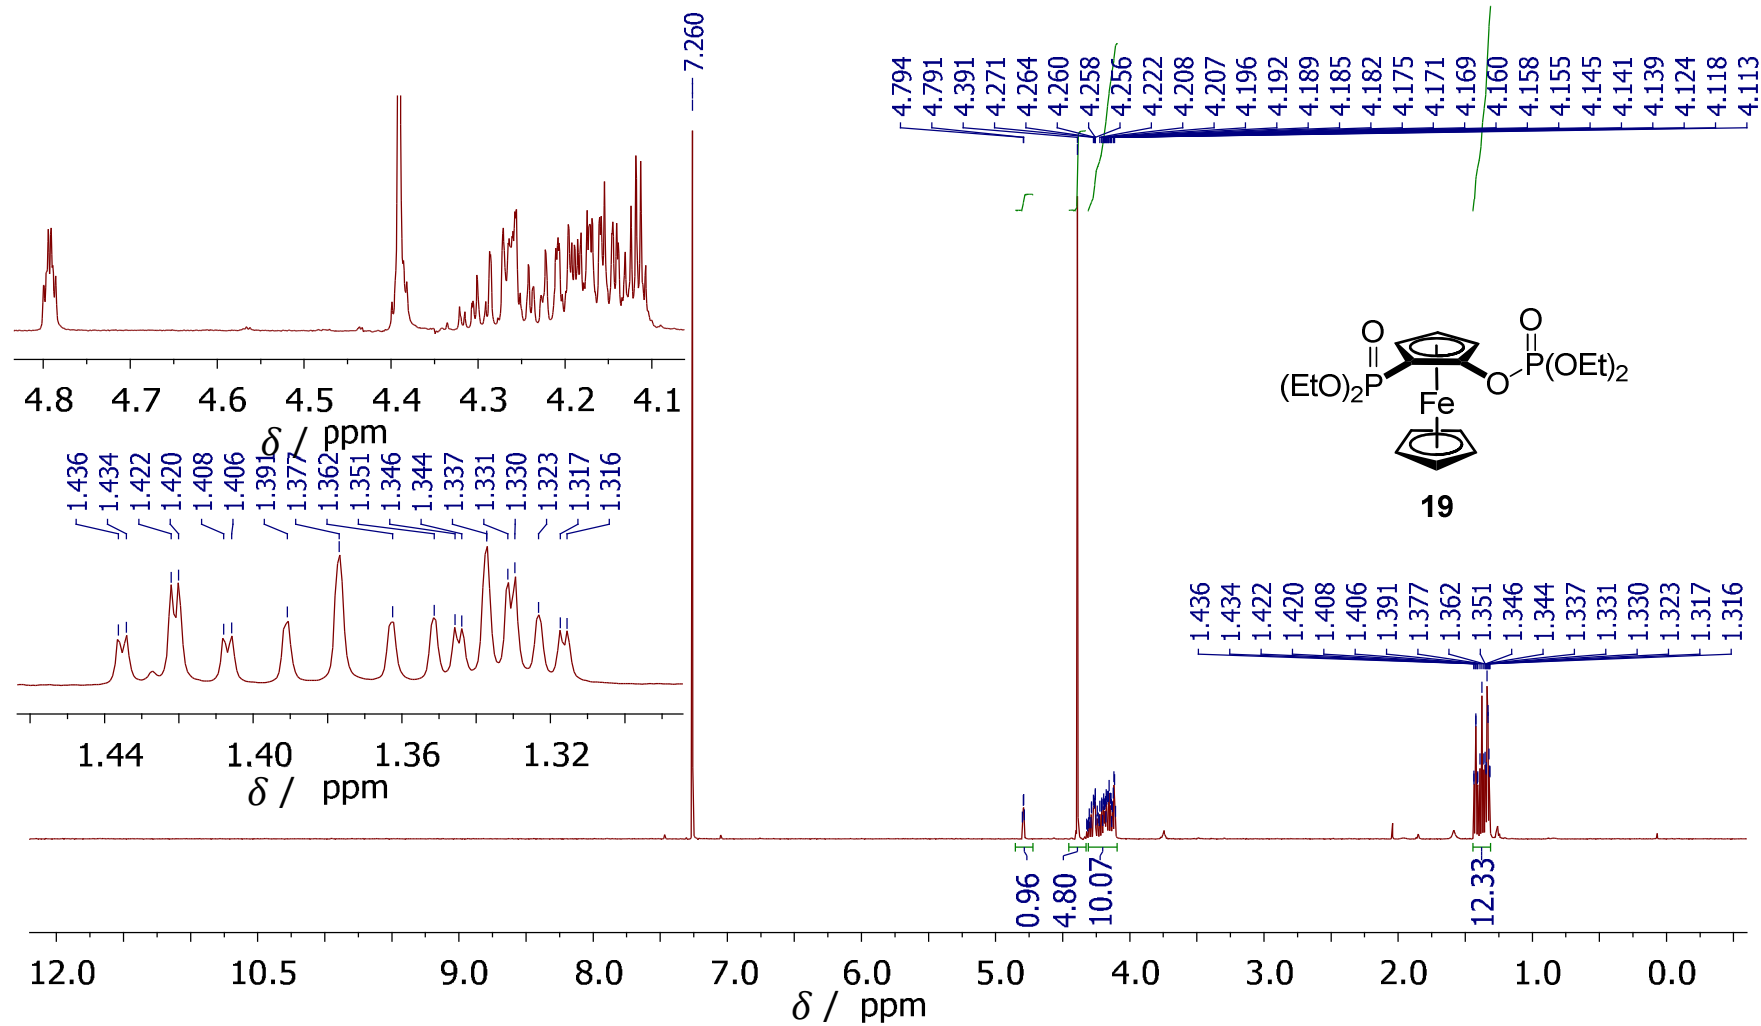

MK-218

**20**

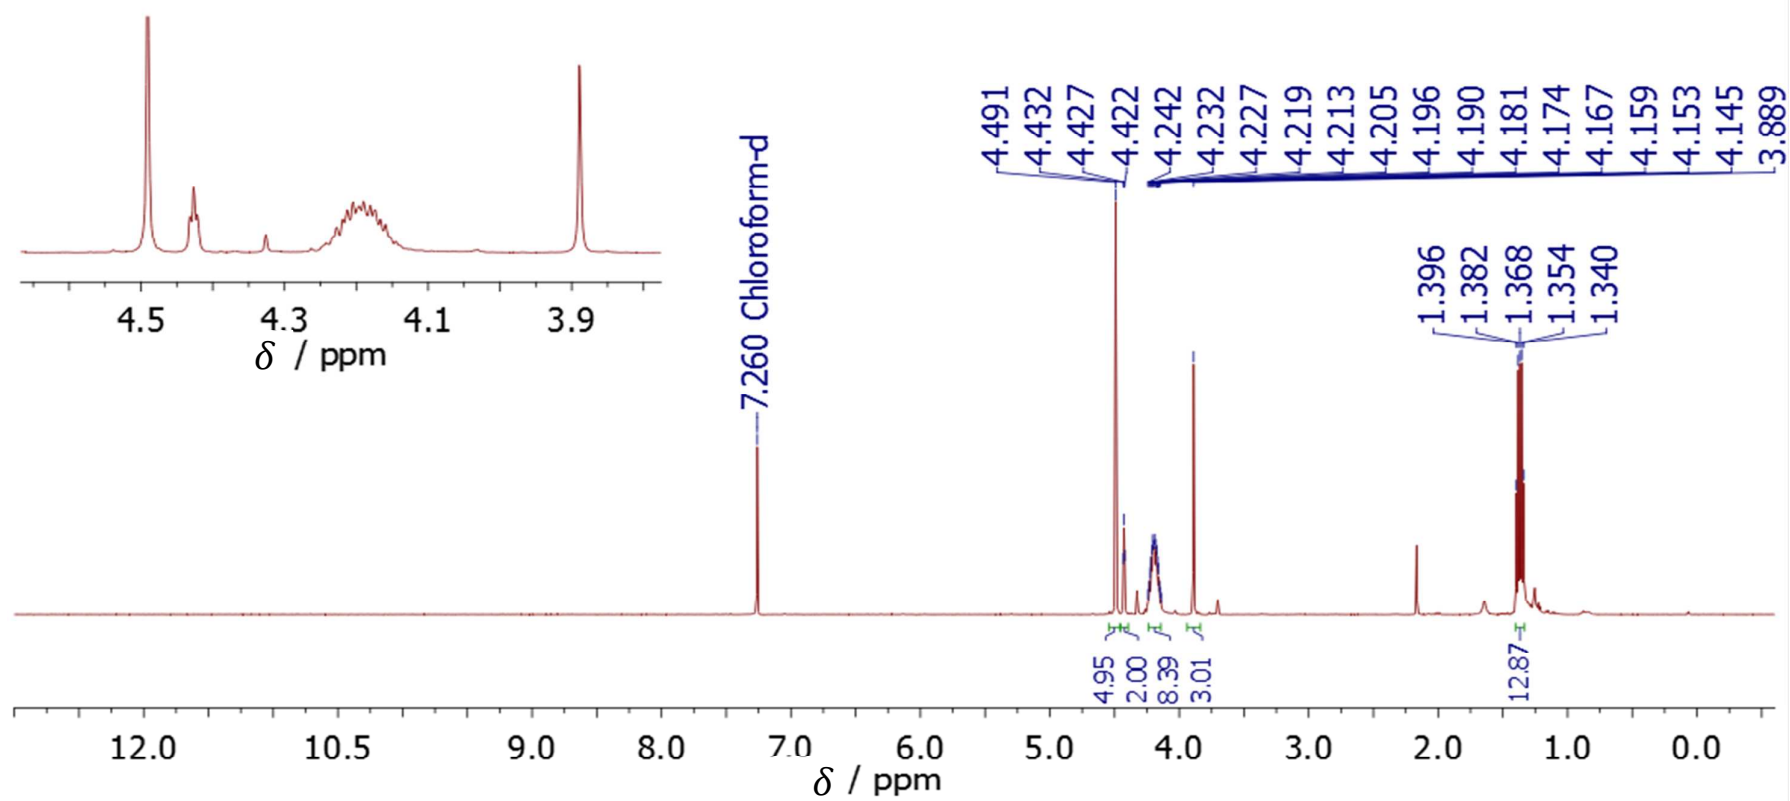

$^{13}\text{C}\{^1\text{H}\}$  NMR,  $\text{CDCl}_3$ , 25 °C

MK-218

C13CPD  $\text{CDCl}_3$  {C:\Bruker\TOPSPIN} korbm 21

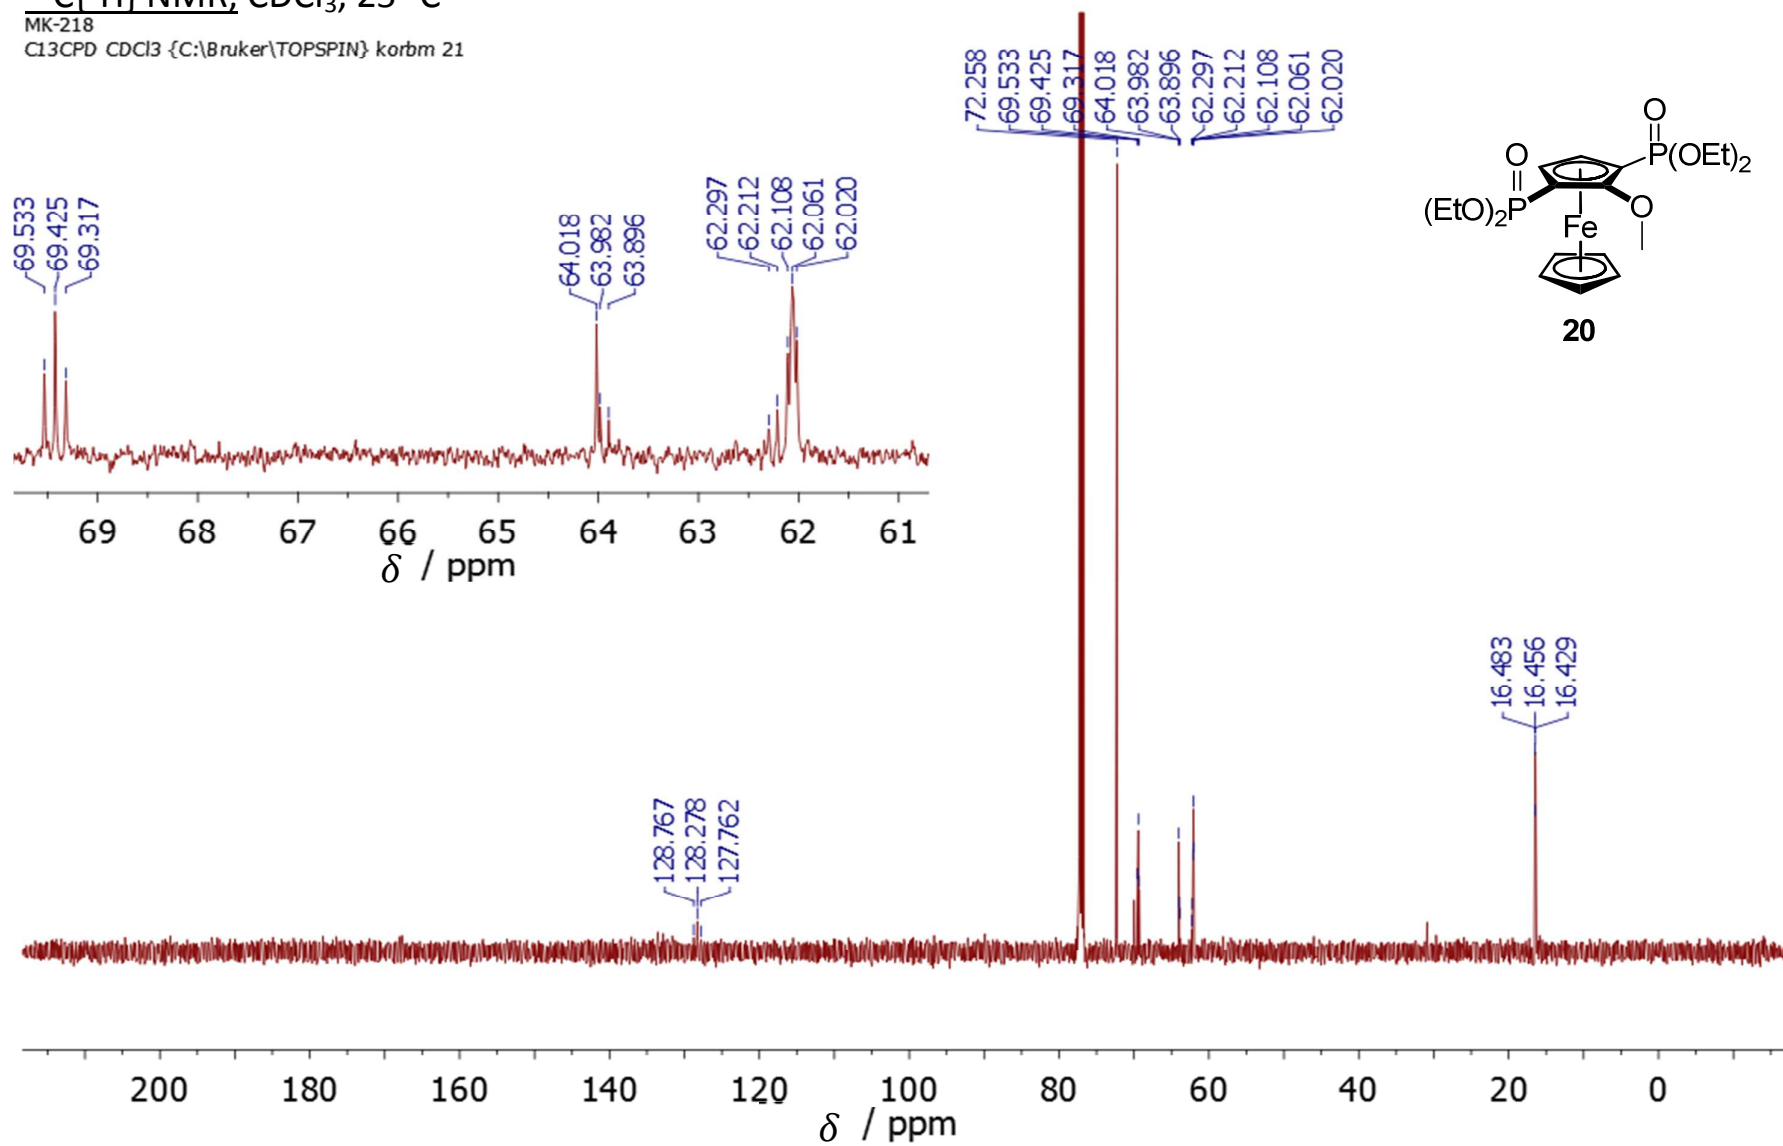

<sup>1</sup>H NMR, CDCl<sub>3</sub>, 25 °C

MK-K-1-10-2

PROTON CDCl<sub>3</sub> {C:\Bruker\TOPSPIN} korbm 43

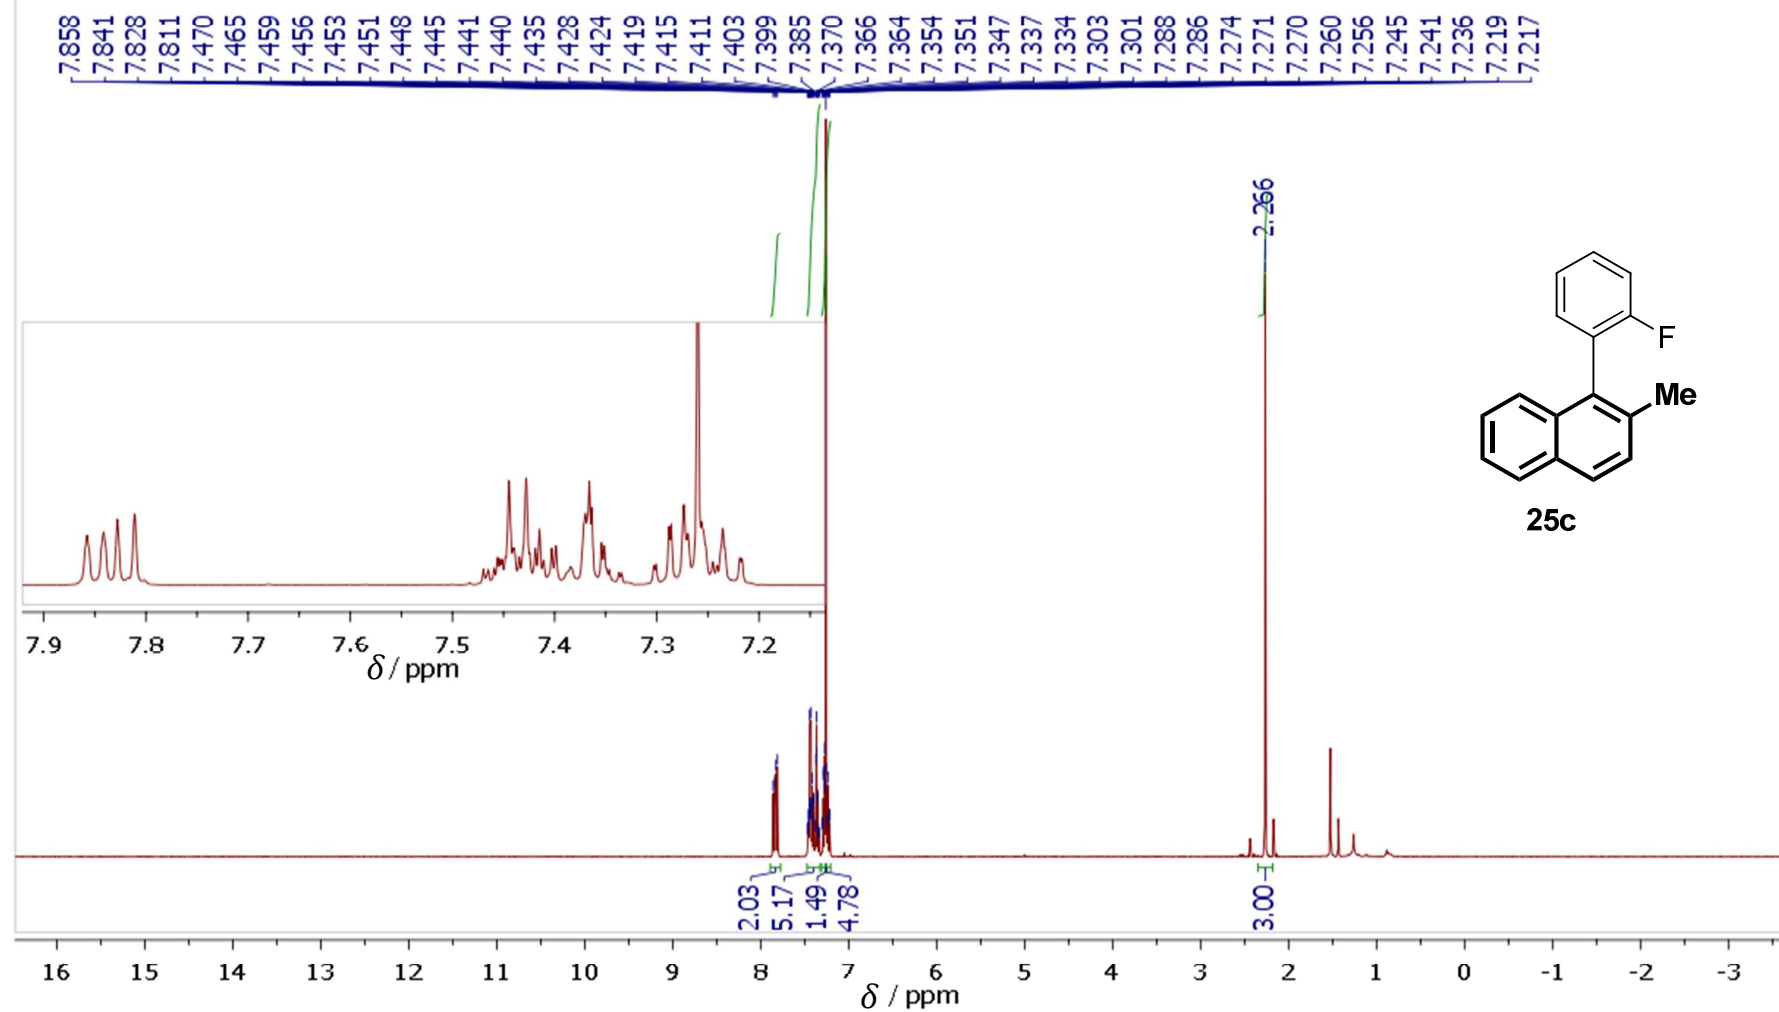

$^{13}\text{C}\{^1\text{H}\}$  NMR,  $\text{CDCl}_3$ , 25 °C

MK-K-1-10-2

CL3CPD  $\text{CDCl}_3$  {C:\Bruker\TOPSPIN} korbm 43

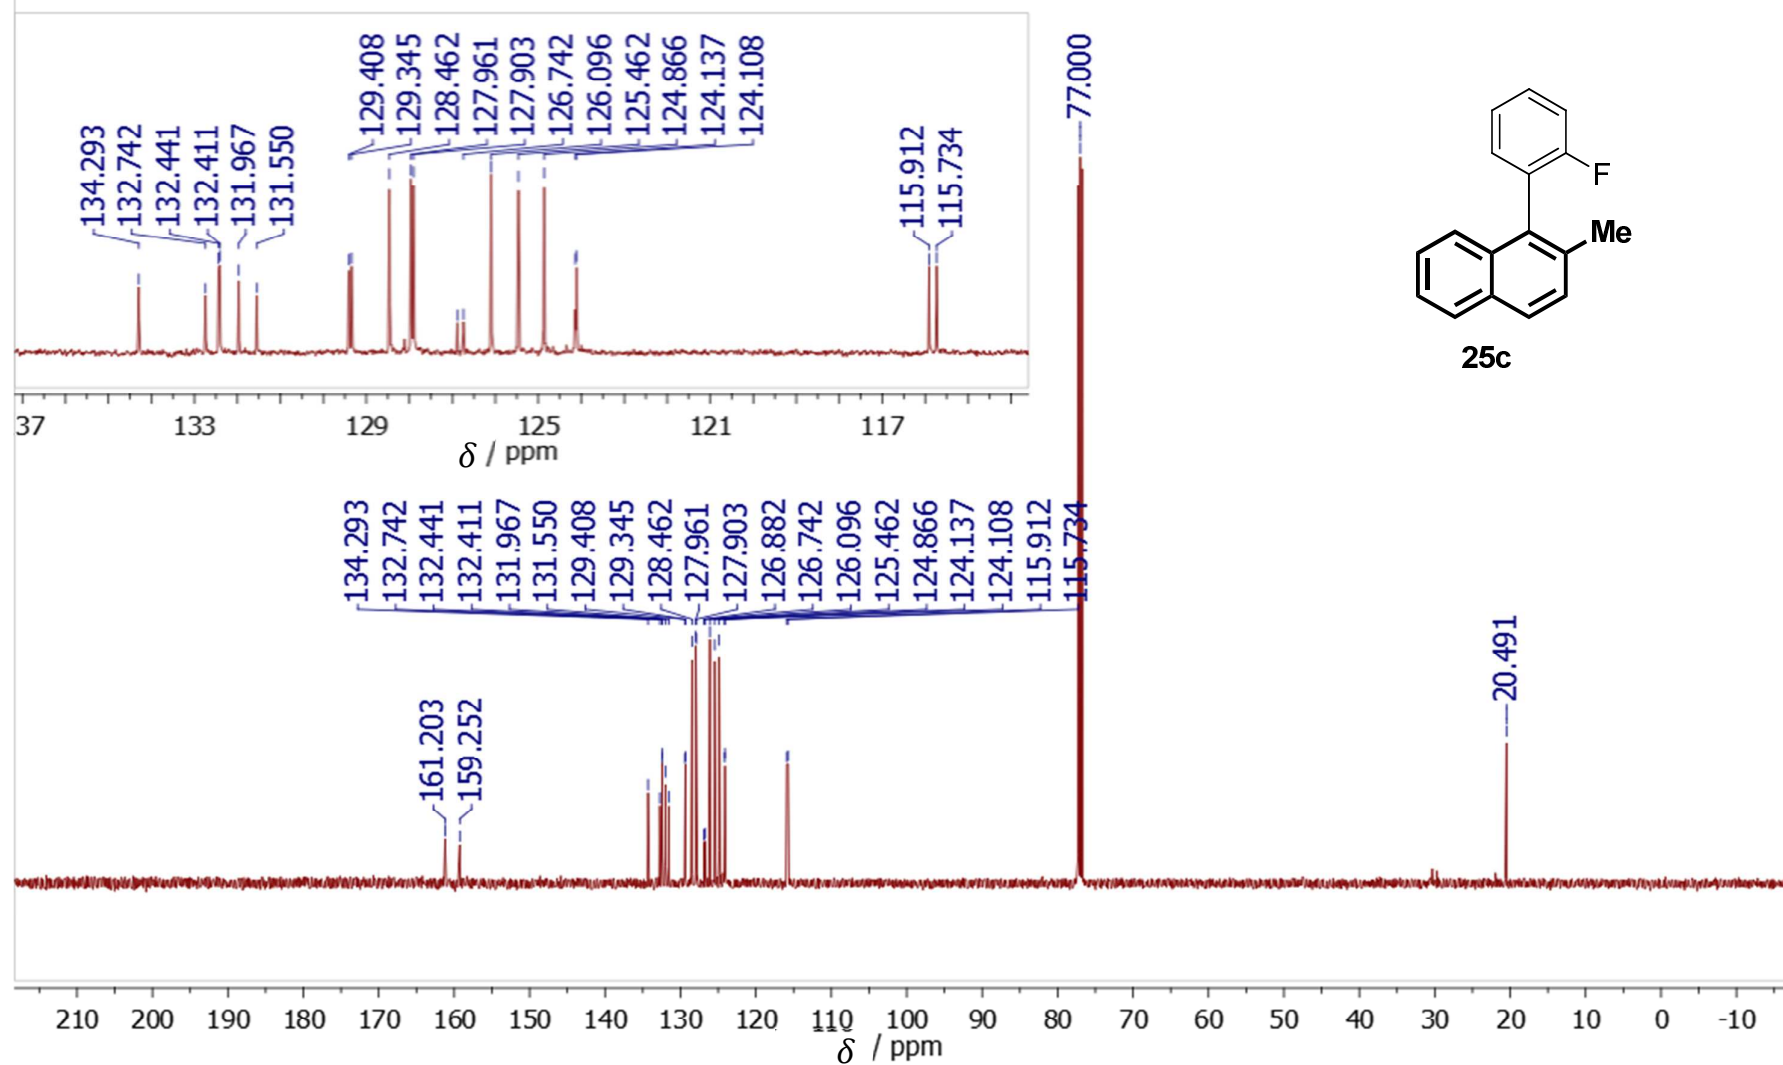

<sup>1</sup>H NMR, CDCl<sub>3</sub>, 25 °C

MK-K-1-9-2

PROTON CDCl<sub>3</sub> {C:\Bruker\TOPSPIN} korbm 52

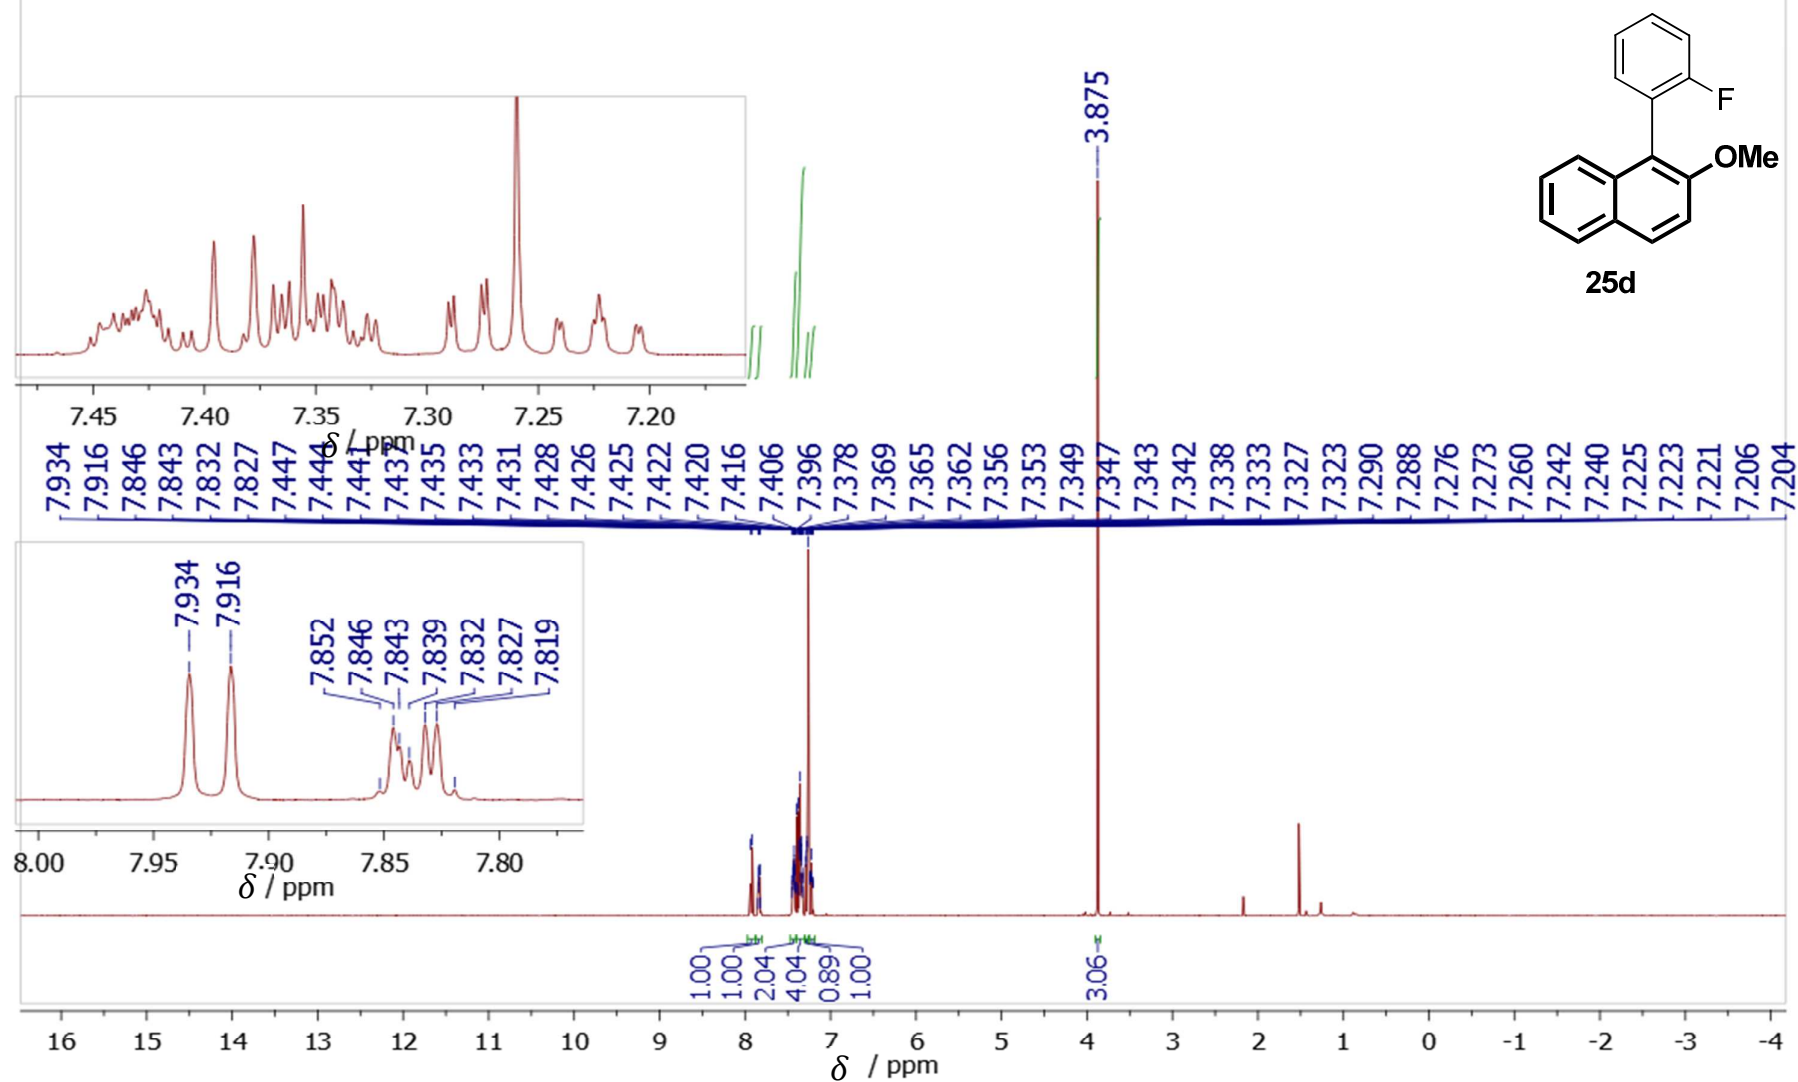

$^{13}\text{C}\{^1\text{H}\}$  NMR,  $\text{CDCl}_3$ , 25 °C

MK-K-1-9

CL3CPD  $\text{CDCl}_3$  {C:\Bruker\TOPSPIN} korbm 44

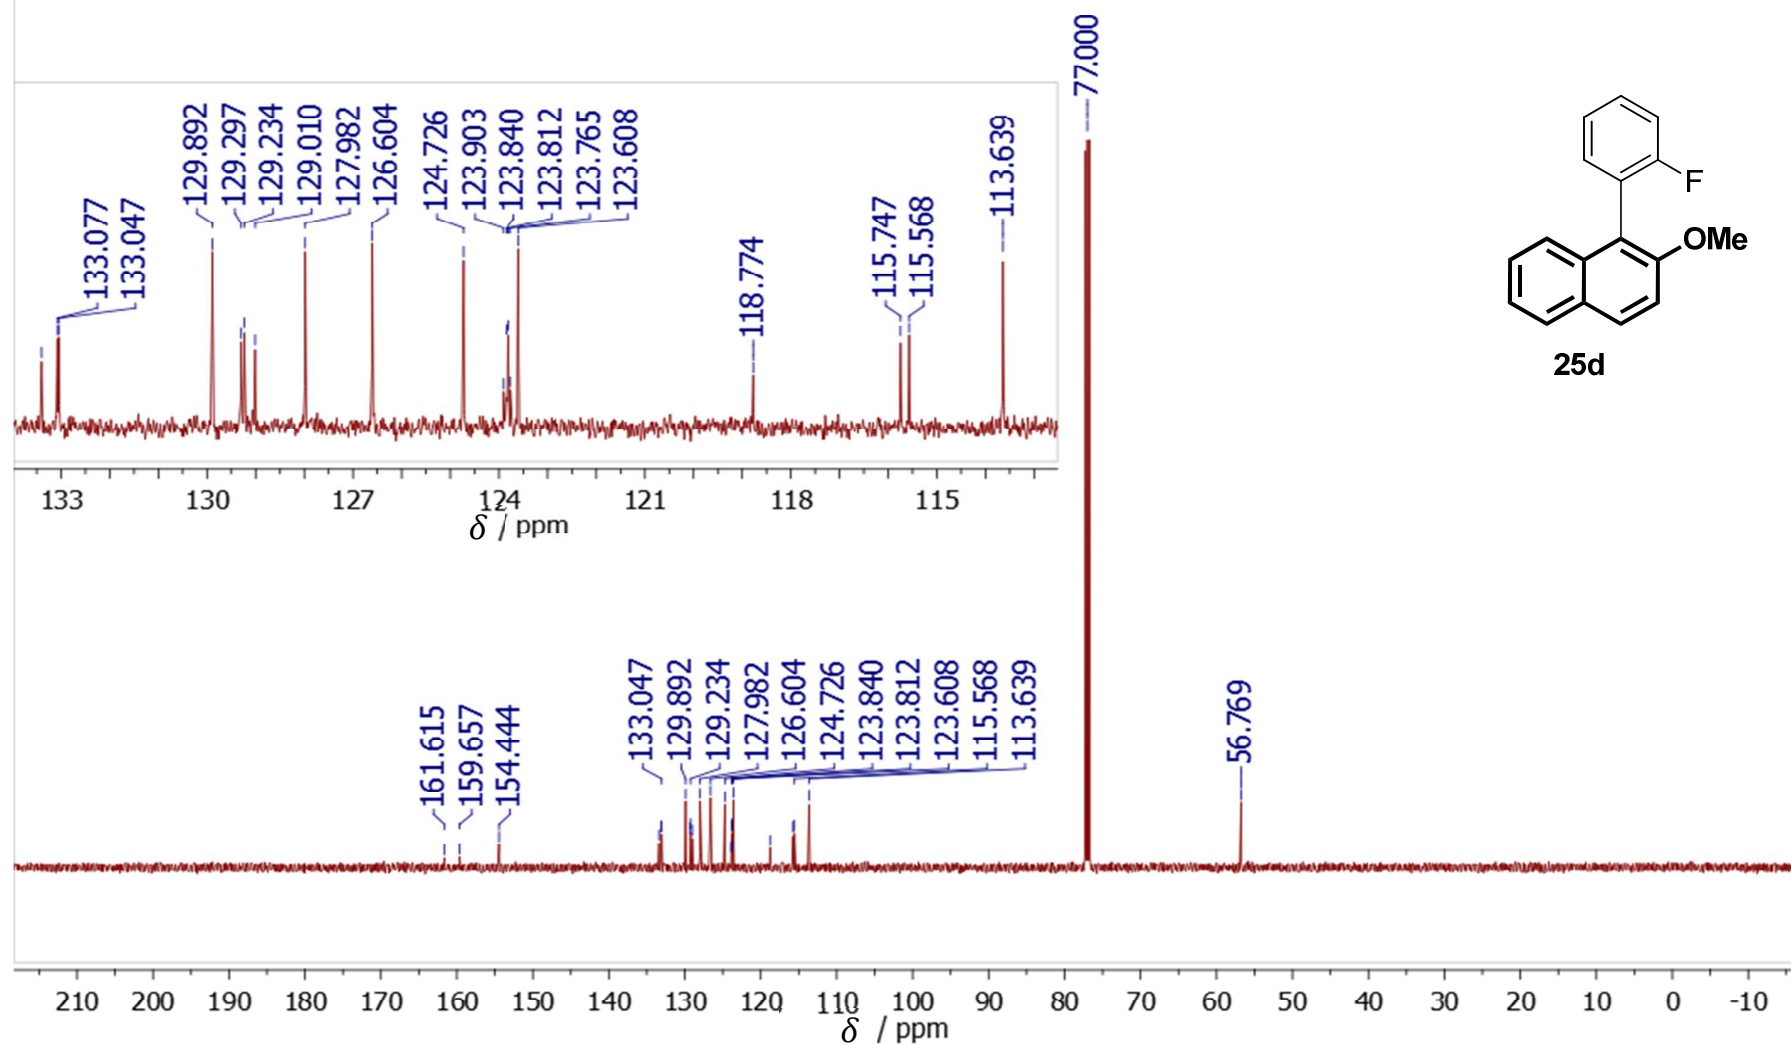

$^1\text{H}$  NMR,  $\text{CDCl}_3$ , 25 °C

MK-K-1-8

PROTON  $\text{CDCl}_3$  {C:\Bruker\TOPSPIN} korbm 30

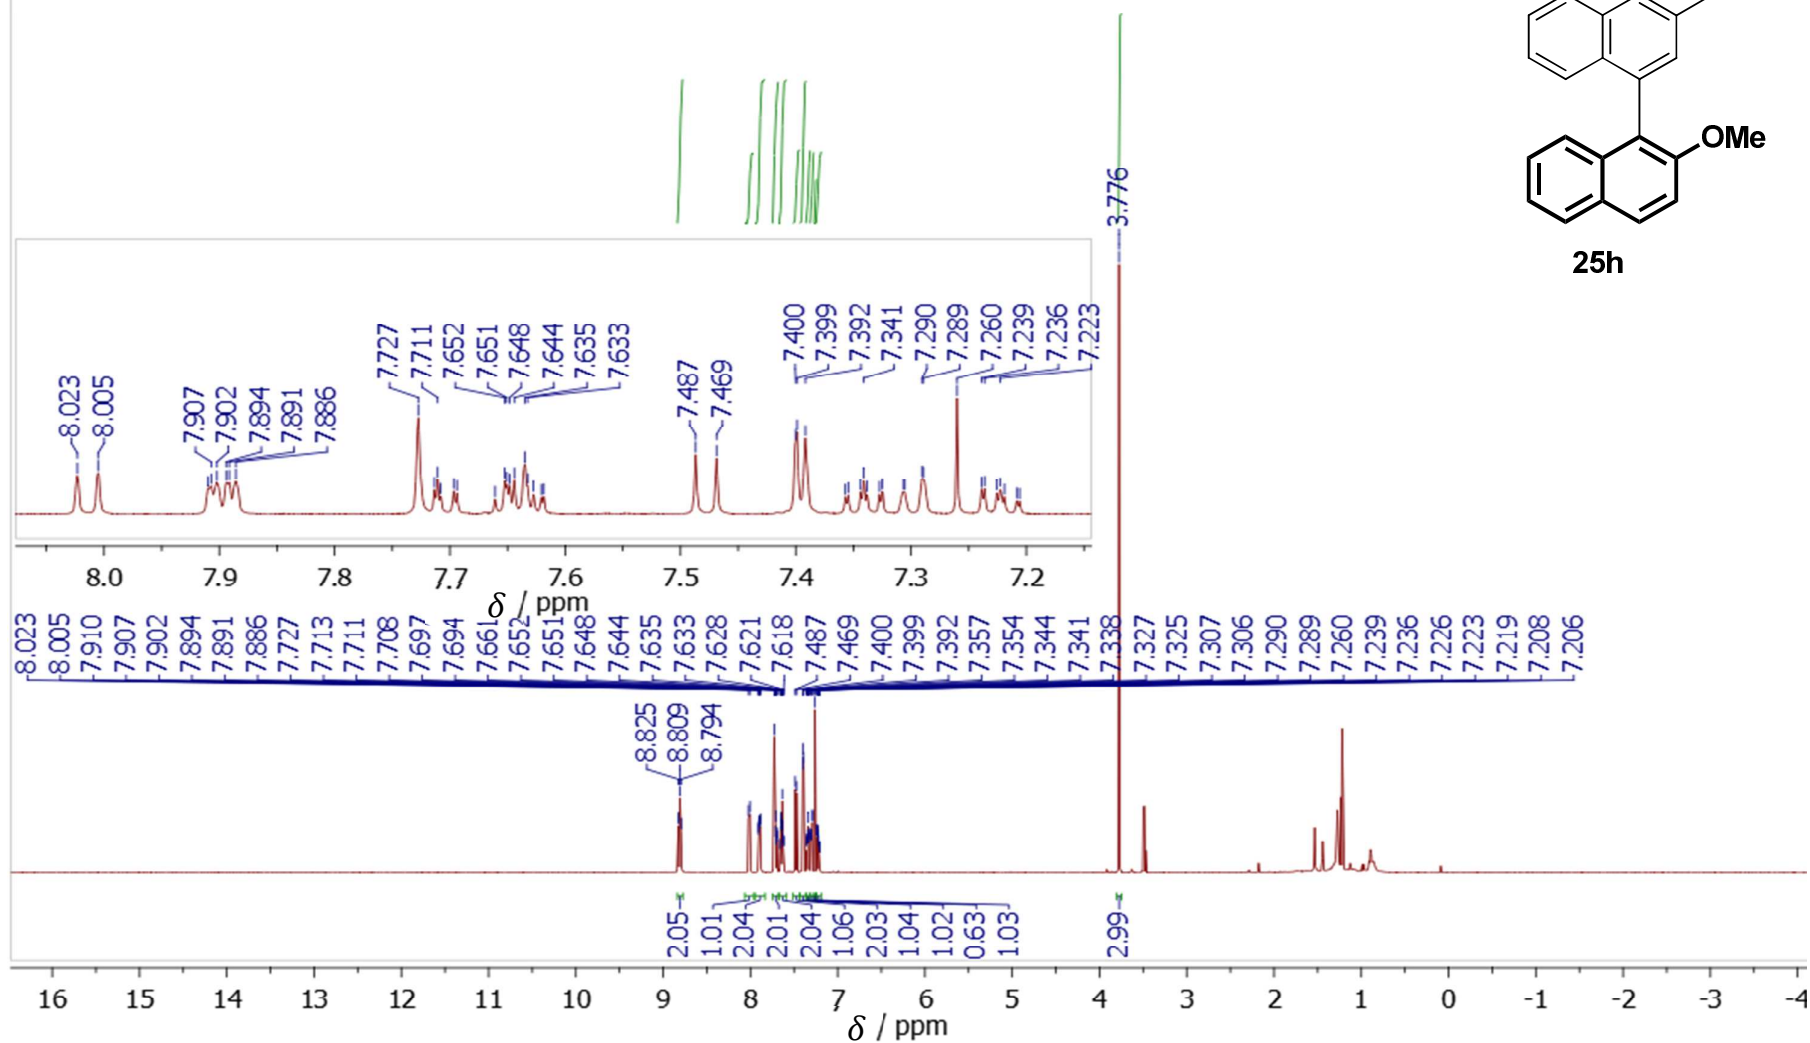

$^{13}\text{C}\{^1\text{H}\}$  NMR,  $\text{CDCl}_3$ , 25 °C

MK-K-1-8

C13CPD  $\text{CDCl}_3$  {C:\Bruker\TOPSPIN} korbm 39

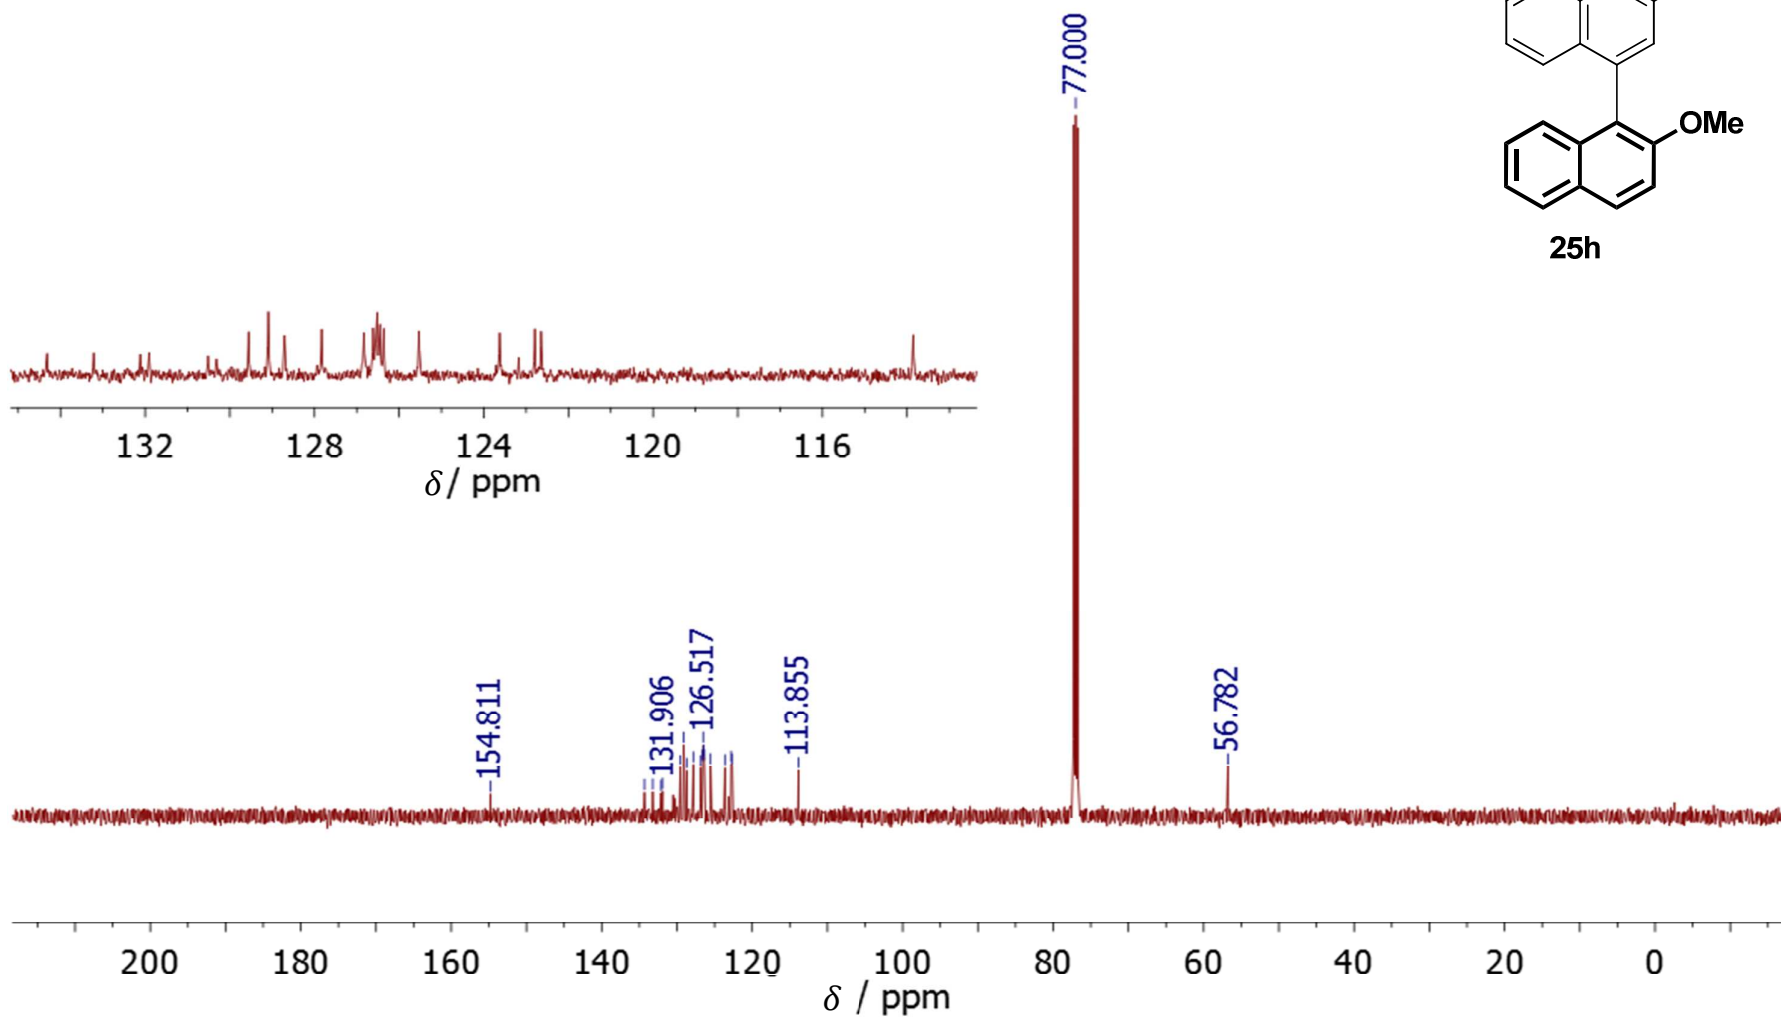

Supplement: Supplementary file 1 [file 3940291]
